## **APOBEC mutagenesis inhibits breast cancer growth through induction of a T cell-mediated antitumor immune response**

Ashley V. DiMarco<sup>1</sup>, Xiaodi Qin<sup>2</sup>, Sarah Van Alsten<sup>3</sup>, Brock McKinney<sup>1</sup>, Nina Marie G. Garcia<sup>1</sup>,  
Jeremy Force<sup>4</sup>, Brent A. Hanks<sup>4</sup>, Melissa A. Troester<sup>3</sup>, Kouros Owzar<sup>2</sup>, Jichun Xie<sup>2</sup>, James V.  
Alvarez<sup>1</sup>

<sup>1</sup>Department of Pharmacology and Cancer Biology, Duke University School of Medicine;

<sup>2</sup>Department of Biostatistics and Bioinformatics, Duke University School of Medicine;

<sup>3</sup>Department of Epidemiology, Gillings School of Global Public Health, University of North Carolina at Chapel Hill

<sup>4</sup>Division of Medical Oncology, Department of Medicine, Duke Cancer Institute

Running title: APOBEC activity induces antitumor immunity in breast cancer

Keywords: APOBEC, mutational signatures, APOBEC3B, breast cancer, immunotherapy, checkpoint blockade

The authors declare no potential conflicts of interest.

## 1 **ABSTRACT**

2           The APOBEC family of cytidine deaminases is one of the most common endogenous  
3 sources of mutations in human cancer. Genomic studies of tumors have found that APOBEC  
4 mutational signatures are particularly enriched in the HER2 subtype of breast cancer and have  
5 been associated with immunotherapy response in diverse cancer types. However, the direct  
6 consequences of APOBEC mutagenesis on the tumor immune microenvironment have not been  
7 thoroughly investigated. To address this, we developed syngeneic murine mammary tumor models  
8 with inducible expression of APOBEC3B. We found that APOBEC activity induces an antitumor  
9 adaptive immune response and CD4<sup>+</sup> T cell-mediated tumor growth inhibition. While polyclonal  
10 APOBEC tumors had a moderate growth defect, clonal APOBEC tumors were almost completely  
11 rejected by the immune system, suggesting that APOBEC-mediated genetic heterogeneity limits  
12 the antitumor adaptive immune response. Consistent with the observed immune infiltration in  
13 APOBEC tumors, APOBEC activity sensitized HER2-driven breast tumors to checkpoint  
14 inhibition. In human breast cancers, the relationship between APOBEC mutagenesis and  
15 immunogenicity varied by breast cancer subtype and the frequency of subclonal mutations. This  
16 work provides a mechanistic basis for the sensitivity of APOBEC tumors to checkpoint inhibitors  
17 and suggests a rationale for using APOBEC mutational signatures as a biomarker predicting  
18 immunotherapy response in HER2-positive breast cancers.



19 **SIGNIFICANCE**

20           APOBEC mutational signatures are observed in many cancers, yet the consequences of  
21 these mutations on the tumor immune microenvironment are not well understood. Using a novel  
22 mouse model, we show that APOBEC activity sensitizes HER2-driven mammary tumors to  
23 checkpoint inhibition and could inform immunotherapy treatment strategies for HER2-positive  
24 breast cancer patients.

## 25 INTRODUCTION

26 More than 50 distinct mutational signatures have been identified in cancer genomes (1–3).  
27 These signatures are thought to reflect transient or ongoing exogenous and endogenous mutational  
28 processes that occur over the lifetime of normal cells and during tumor development. Single-base  
29 substitution (SBS) signature 2 is characterized by C-to-T transitions within the trinucleotide motif  
30 of TCW (where W represents adenine or thymine), and SBS signature 13 is defined by C-to-G  
31 transversions within the same TCW motif. Both signatures are attributed to the APOBEC  
32 (apolipoprotein B mRNA editing enzyme, catalytic polypeptide-like) family of cytidine  
33 deaminases (1,2). APOBEC enzymes catalyze the deamination of cytosine to uracil on single-  
34 stranded DNA which, following repair, manifests predominantly as C-to-T and C-to-G point  
35 mutations. The majority of these substitutions are distributed stochastically throughout the somatic  
36 genome; however, some are localized in multi-kilobase long, strand-coordinated clusters referred  
37 to as ‘kataegis’ (1,4–6). While APOBEC enzymes have evolutionarily conserved activity in the  
38 generation of antibody diversification and restriction of viruses and endogenous retrotransposons,  
39 their off-target mutagenic activity on the host somatic genome drives cancer genome instability  
40 (reviewed by (7,8)). APOBEC-mediated mutational signatures have been detected in at least 22  
41 different tumor types and are particularly enriched in bladder, head and neck, cervical, and breast  
42 cancer (9,10). Importantly, nearly half of breast cancers exhibit kataegis hypermutation clusters  
43 (11). Among breast cancer subtypes, human epidermal growth factor receptor 2-positive (HER2<sup>+</sup>)  
44 breast tumors are reported to have the highest median levels of APOBEC signature enrichment  
45 (2,9,12).

46 Somatic mutations in cancer can give rise to unique mutant peptides that serve as immune-  
47 reactive neoantigens, allowing cytotoxic T cells to target tumor cells for elimination (13,14). Thus,

48 recent work has focused on understanding the role of ongoing mutational processes in contributing  
49 to tumor immunogenicity and response to immunotherapies (15–17). Despite the prevalence of  
50 APOBEC mutational signatures in breast cancer, these tumors are traditionally thought to be  
51 poorly immunogenic or “cold”. Breast tumors generally have a modest tumor mutation burden  
52 (TMB) (2) and low tumor-infiltrating lymphocytes relative to more immunogenic cancers that  
53 exhibit robust immune infiltration and are sensitive to checkpoint inhibitors (reviewed by (18–  
54 20)). However, the initial trials of anti-PD-1 and anti-PD-L1 monotherapy in triple-negative breast  
55 cancer (TNBC) showed promising objective response rates of up to 19% (21,22). The combination  
56 of anti-PD-L1 and nab-paclitaxel had an objective response rate of 39% and prolonged overall  
57 survival, leading to its FDA approval for advanced/metastatic PD-L1<sup>+</sup> TNBC in 2019, the first  
58 approval of immunotherapy for breast cancer (23). However, checkpoint inhibitor clinical trials  
59 have been less successful for HER2<sup>+</sup> breast cancer patients. In an initial trial for anti-PD-L1  
60 monotherapy in metastatic breast cancer, there were no objective responses in the HER2<sup>+</sup> subtype  
61 (24). When trastuzumab was combined with anti-PD-1 for HER2<sup>+</sup> patients, responses ranged from  
62 0%-15.2% and were highly dependent on PD-L1 status (25). However, APOBEC mutational  
63 signatures have yet to be investigated as a specific class of hypermutation that transforms an  
64 immunologically “cold” HER2<sup>+</sup> breast tumor “hot”, rendering the tumor responsive to checkpoint  
65 inhibition.

66       Recent work on how mutational signatures impact tumor immunity has revealed several  
67 pieces of evidence potentially implicating APOBEC mutagenesis in immunotherapy response. In  
68 pan-cancer analyses from The Cancer Genome Atlas (TCGA), the kataegis-like APOBEC  
69 mutational signature was significantly correlated with PD-L1 expression and neopeptide  
70 hydrophobicity (26,27). Further, APOBEC signatures were associated with a greater likelihood of

71 response to immune checkpoint inhibition in non-small cell lung cancer (NSCLC) (28), head and  
72 neck cancer, bladder cancer (29), and in a small cohort of breast cancer patients (30). In a recent  
73 study using mouse models of TNBC, overexpression of the murine APOBEC3 ortholog sensitized  
74 tumors to checkpoint inhibitors (31). Additionally, overexpression of human APOBEC3B in a  
75 vaccine setting sensitized mouse melanomas to checkpoint inhibition (32). However, the direct  
76 consequences of APOBEC mutagenesis on the tumor immune microenvironment and tumor  
77 growth in the absence of checkpoint inhibitors have not been thoroughly explored. A mechanistic  
78 understanding of how APOBEC mutagenesis alters the tumor immune microenvironment would  
79 inform the use of immune therapies for human tumors with APOBEC mutational signatures.  
80 Furthermore, despite the high enrichment of APOBEC signatures in HER2<sup>+</sup> breast cancer, no  
81 studies to our knowledge have investigated a role for APOBEC mutagenesis in conferring clinical  
82 benefit to checkpoint blockade in HER2<sup>+</sup> breast cancer.

83 To address these questions, we developed a syngeneic, immunocompetent murine HER2-  
84 driven mammary tumor model with APOBEC activity. Using this model, we examined the  
85 consequences of APOBEC activity and genetic heterogeneity on tumor growth, investigated  
86 tumor-immune system interactions in APOBEC tumors, and assessed the therapeutic response of  
87 these tumors to checkpoint inhibitor therapy. Finally, we examined the relationship between  
88 APOBEC mutagenesis and adaptive immune response in human breast tumors.

89

## 90 **RESULTS**

91 **Ectopic expression of A3B in murine mammary tumor cells is not lethal and induces cytidine**  
92 **deaminase activity**

93 To induce APOBEC mutagenesis *in vivo* in an immunocompetent HER2-driven mammary  
94 tumor model, we utilized the SMF cell line, which is derived from a mammary tumor arising in  
95 the MMTV-Neu/Her2 mouse model on the FVB background (33). We engineered SMF cells to  
96 conditionally express the human APOBEC family member, APOBEC3B (A3B), and thereby  
97 acquire APOBEC mutational signatures during tumor progression. Along with APOBEC3A, A3B  
98 is one of the major contributors of APOBEC mutations in cancer genomes (3,10,34,35). Studies  
99 in yeast and mammalian cells have shown that expression of A3B is sufficient to induce a kataegis-  
100 like pattern, and preferentially induce mutations at the TCW trinucleotide context resembling SBS  
101 signatures 2 and 13 in cancer genomes (5,36,37), whereas the murine APOBEC3 ortholog localizes  
102 to the cytoplasm and has low catalytic activity (38). The SMF cell line was stably transduced with  
103 a lentivirus encoding reverse tetracycline-controlled transactivator (rtTA) and a lentivirus  
104 encoding rtTA-responsive human A3B (referred to as “SMF-A3B cells”). This system allows for  
105 titratable and reversible expression of A3B in tumor cells with the administration of doxycycline  
106 (dox) in the cell culture medium or in the drinking water of mice.

107 To characterize the A3B expression system *in vitro*, SMF-A3B cells were cultured with  
108 increasing concentrations of dox, with or without subsequent removal of dox from the medium.  
109 A3B mRNA and protein expression were dose-responsive and reversible (Fig. 1A, B).  
110 Additionally, A3B protein was constitutively localized to the nucleus in the presence of dox,  
111 demonstrating proper subcellular localization of this APOBEC family member (39)(Fig. 1C). In  
112 an *in vitro* cytidine deaminase activity assay, increasing concentrations of dox induced dose-  
113 responsive deaminase activity in SMF-A3B cells (Fig. 1D). A3B expression did not affect cell  
114 proliferation or survival, as measured by an ATP-based cell viability assay and colony formation  
115 assay (Fig. 1E-G). For subsequent experiments we used a dox concentration (1 µg/mL) that

116 induced A3B expression levels and deaminase activity levels comparable to that of the APOBEC-  
117 high human HER2<sup>+</sup> breast cancer cell line, BT474 (Fig. 1A, D). These data suggest SMF-A3B is  
118 a suitable system to induce A3B expression and cytidine deaminase activity in a syngeneic,  
119 orthoptic murine tumor model.

120

121 **A3B expression does not affect tumor growth in immunodeficient mice and is predicted to**  
122 **induce APOBEC-mediated mutational signatures**

123 We first tested whether expression of A3B affects tumor growth in the absence of an  
124 adaptive immune system. SMF-A3B cells were implanted in the mammary fat pad of  
125 immunodeficient NOD.Cg-Prkdc<sup>scid</sup> Il2rg<sup>tm1Wjl</sup>/SzJ (NSG) mice, and mice received either normal  
126 or dox drinking water throughout the duration of tumor growth to express A3B. Control and A3B-  
127 expressing tumors grew at similar rates (Supplementary Fig. S1A), indicating that in the absence  
128 of a functional immune system, A3B expression does not affect tumor growth. This is consistent  
129 with the finding that A3B expression does not affect the growth or viability of SMF cells *in vitro*.

130 We next examined whether SMF-A3B tumors have evidence of APOBEC mutagenesis.  
131 Because APOBEC-induced mutations are randomly distributed throughout the genome, it is  
132 technically difficult to detect these mutations in a heterogeneous population of cancer cells (36,40).  
133 Therefore, to measure the APOBEC mutational process in mouse tumors generated from the SMF-  
134 A3B cell line, we developed a gene expression-based classifier for prediction of APOBEC  
135 mutational signatures. The classifier was trained using sets of differentially expressed genes from  
136 RNA-seq data of APOBEC-high and APOBEC-low breast cancers from TCGA using 10-fold  
137 cross validation (as determined by APOBEC mutational signature enrichment score from whole-  
138 exome sequencing; see Methods). This analysis suggested that a 10-gene classifier was optimal

139 for prediction. The genes selected for the classifier were *AXIN2*, *CCDC157*, *ICOS*, *NAGS*, *NXPH3*,  
140 *PRODH*, *PSD*, *SRRM3*, *STMN3*, and *TTC25*.

141 We next used this classifier to test whether SMF-A3B tumors in NSG mice have evidence  
142 of APOBEC mutagenesis. We performed RNA-seq on 6 control tumors and 6 tumors expressing  
143 A3B. When applied to this independent dataset, the classifier correctly identified 4 of 6 A3B-  
144 expressing tumors as well as 4 of 6 control tumors (66% sensitivity and 66% specificity,  
145 Supplementary Fig. S1B), for an overall accuracy in mouse tumors of 66%. This indicates that the  
146 gene expression-based classifier may be used to predict APOBEC mutational signatures in the  
147 genomes of human and murine tumors, and A3B-expressing tumors generated from SMF-A3B  
148 cells are likely to harbor genomic APOBEC-mediated mutations.

149

### 150 **APOBEC activity slows mammary tumor growth and triggers the infiltration of antitumor** 151 **adaptive immune cells**

152 Given the evidence that the APOBEC mutational signature is associated with both an  
153 immune response and sensitivity to immunotherapy in NSCLC, bladder, and head and neck cancer,  
154 we examined the effects of *in vivo* APOBEC activity on the tumor immune microenvironment.  
155 SMF-A3B cells were orthotopically implanted bilaterally in the mammary gland of syngeneic,  
156 immunocompetent wildtype FVB mice. One cohort of mice was administered dox in the drinking  
157 water to induce A3B expression and APOBEC activity in the tumor cells throughout tumor growth  
158 (“APOBEC tumors”), while the control cohort received normal drinking water (Fig. 2A).  
159 Interestingly, APOBEC tumors grew significantly slower than control tumors and had a smaller  
160 mass at endpoint (Fig. 2B). Immunofluorescence staining of APOBEC and control tumors for a  
161 marker of double-stranded DNA breaks,  $\gamma$ H2AX, showed no activation of the DNA damage

162 response *in vivo* (Supplementary Fig. S1C, D). Similarly, A3B expression for two weeks did not  
163 induce  $\gamma$ H2AX or cleaved PARP in SMF-A3B cells *in vitro* (Supplementary Fig. S1E). Taken  
164 together with the finding that A3B expression does not affect cell growth *in vitro* (Fig. 1E-G) or  
165 tumor growth in immunodeficient NSG mice (Supplementary Fig. S1A), this suggests that the  
166 growth defect of APOBEC tumors was mediated by a tumor cell-extrinsic mechanism, specifically  
167 the immune response.

168 To gain insight into how A3B expression alters the tumor microenvironment (TME) of  
169 APOBEC tumors, six mice per cohort were randomly selected for immune profiling by flow  
170 cytometry (see Supplementary Fig. S2 for gating strategy and Supplementary Fig. S3 for  
171 representative FACS plots). APOBEC tumors showed a substantial infiltration of total leukocytes  
172 ( $CD45^{+}EpCAM^{-}$ ) compared to control tumors (Fig. 2D).  $CD8^{+}$  T cells ( $CD45^{+}CD3^{+}CD8^{+}$ ),  $CD4^{+}$   
173 T cells ( $CD45^{+}CD3^{+}CD4^{+}$ ), and  $CD103^{+}$  dendritic cells (DCs;  $CD45^{+}CD11c^{+}MHC-II^{+}F4/80^{-}$   
174  $CD103^{+}$ ) were expanded in the APOBEC TME, as measured both as the percentage of  $CD45^{+}$  cells  
175 (Fig. 2C) and the percentage of total live cells (Fig. 2D). There was no change in the infiltration  
176 of natural killer (NK) cells ( $CD45^{+}NK1.1^{+}CD3^{-}$ ), although several subsets of cells that may have  
177 immunosuppressive potential were significantly reduced in the APOBEC tumors, including the  
178 fraction of T regulatory cells (Tregs;  $CD45^{+}CD3^{+}CD4^{+}FOXP3^{+}$ ), type-2 T helper cells (Th2;  
179  $CD45^{+}CD3^{+}CD4^{+}GATA3^{+}$ ), and tumor-associated macrophages ( $CD45^{+}F4/80^{+}CD11c^{low}$ ) (Fig.  
180 2D). Furthermore, APOBEC tumors were comprised of more immune cells producing the  
181 proinflammatory cytokine interferon- $\gamma$  ( $IFN\gamma$ ;  $CD45^{+}IFN\gamma^{+}$ ), and cytotoxic granule granzyme B  
182 (GZMB;  $CD45^{+}GzmB^{+}$ ) (Fig. 2E, F). Finally,  $PD-1^{+}$  immune cells ( $CD45^{+}PD-1^{+}$ ) and  $PD-L1^{+}$   
183 tumor cells ( $EpCAM^{+}PD-L1^{+}$ ) were elevated in the APOBEC tumors compared to control tumors,  
184 suggesting an active T cell-mediated immune response and potential feedback signaling leading



185 to T cell dysfunction (Fig. 2E, F). A similar expansion of CD8<sup>+</sup> T cell and CD103<sup>+</sup> DC populations  
186 was observed in the tumor-draining lymph nodes from mice with APOBEC tumors  
187 (Supplementary Fig. S4A). The defect in APOBEC tumor growth and enhanced immune  
188 infiltration measured by flow cytometry was also observed in an independent experiment  
189 (Supplementary Fig. S4B, C). To extend these results to a second breast cancer cell line, we  
190 engineered inducible A3B expression in the mouse breast cancer line, EMT6, (Supplementary Fig.  
191 S4D-F). As with SMF tumors, EMT6 APOBEC tumors grew more slowly and had increased  
192 infiltration of leukocytes when implanted in syngeneic BALB/c mice (Supplementary Fig. S4G-  
193 I).

194 Next, to examine the relationship between immune infiltration and tumor size, we  
195 measured the correlation between immune cell abundance and tumor size at endpoint in SMF  
196 tumors. CD8<sup>+</sup> T cells, CD4<sup>+</sup> T cells, CD103<sup>+</sup> DCs, and IFN $\gamma$ <sup>+</sup> cells were each negatively correlated  
197 with tumor size (Fig. 2G). This suggests that the adaptive immune response may mediate the  
198 growth defect observed in APOBEC tumors.

199 The localization of T cells in the TME is an important factor that influences tumor  
200 immunity and responses to immunotherapy (reviewed by (43)). T cells can be excluded from the  
201 tumor core and instead localize to the periphery in murine models and human tumors (44–47), and  
202 this exclusion may be one mechanism of immune suppression. Therefore, to assess T cell  
203 localization in APOBEC tumors, we performed immunohistochemical (IHC) staining for CD3 on  
204 an independent cohort of SMF tumors. CD3 staining was consistent with flow cytometry analyses  
205 and revealed an increase in the total number of T cells in APOBEC tumors. The T cells were most  
206 concentrated on the periphery of the APOBEC tumors, although importantly, significant levels of  
207 T cells also infiltrated the tumor core (Fig. 2H, I).

208

209 **The growth defect of APOBEC tumors is dependent on the A3B catalytic activity, not A3B**  
210 **protein expression**

211 To discern whether the antitumor immune response in APOBEC tumors was due to the  
212 catalytic activity of A3B, and to rule out the possibility that expression of the human A3B protein  
213 in mouse cells may be immunogenic, we generated a catalytically inactive A3B mutant by site-  
214 directed mutagenesis of one of the A3B catalytic domains (E255Q). SMF cells were transduced  
215 with lentivirus expressing the A3B catalytic mutant to generate SMF-A3B<sup>inactive</sup> cells. Dox  
216 treatment led to expression of catalytically-dead A3B in these cells, but there was no detectable  
217 increase in deaminase activity (Supplementary Fig. S5A-C). SMF-A3B<sup>inactive</sup> cells were then  
218 injected into the mammary glands of immunocompetent wildtype mice on dox water to induce  
219 expression of the full-length, catalytically dead A3B protein. Tumors expressing catalytically dead  
220 A3B (SMF-A3B<sup>inactive</sup> + dox) grew at similar rates and had similar numbers of total leukocytes  
221 (CD45<sup>+</sup> cells) and T cells (CD3<sup>+</sup> cells) as control tumors (Supplementary Fig. S5D, E). This  
222 indicates that the growth defect and immune response in APOBEC tumors is dependent on A3B  
223 catalytic activity and is not the result of expression of the human A3B protein in mouse cells.

224 To further explore whether the tumor growth defect and immune response of APOBEC  
225 tumors was due to A3B-mediated mutagenesis, as opposed to the expression of A3B protein, we  
226 took advantage of the reversibility of the dox-inducible system. SMF-A3B cells were cultured with  
227 dox in the cell medium for two weeks to mutagenize the cells and then dox was removed to  
228 downregulate A3B expression. These *in vitro* APOBEC mutagenized cells retain A3B-catalyzed  
229 mutations but do not express A3B protein. The proliferation rate of *in vitro* APOBEC mutagenized  
230 cells was similar to control, non-mutagenized cells (Supplementary Fig. S5F). In contrast, when

231 implanted into the mammary gland of wildtype mice without dox in their drinking water  
232 (Supplementary Fig. S5G), the *in vitro* APOBEC mutagenized tumors grew more slowly than  
233 control tumors and had evidence of an increased adaptive immune response, as measured by qRT-  
234 PCR for T cell-specific genes *Gzma*, *Prf-1*, *Tbx21* (Supplementary Fig. S5H, I). The growth defect  
235 of *in vitro* APOBEC mutagenized tumors was not evident in NSG mice (Supplementary Fig. S5J),  
236 further confirming the role of the adaptive immune response in mediating the growth defect of  
237 APOBEC tumors. Together these data reveal that A3B activity promotes an infiltrated-inflamed  
238 TME in HER2-driven murine tumors and leads to an immune-dependent growth defect.

239

#### 240 **APOBEC activity slows breast tumor growth by stimulating a tumor antigen-specific** 241 **adaptive immune response**

242 To understand the basis of the immune-mediated growth defect of APOBEC tumors, we  
243 performed RNA-sequencing on control and APOBEC tumors from either immunocompetent  
244 wildtype mice or immunodeficient NSG mice. APOBEC tumors in wildtype mice showed a  
245 significant upregulation of adaptive immune response gene ontology (GO) terms, including  
246 regulation of T cell mediated immunity/cytotoxicity/differentiation, antigen processing and  
247 presentation, and B cell activation (Fig. 3A, Supplementary Fig. S6A). Moreover, the top two  
248 pathways enriched in the APOBEC tumors in wildtype mice by gene set enrichment analysis  
249 (GSEA) were allograft rejection (Supplementary Fig. S6B) and IFN $\gamma$  response (Fig. 3B),  
250 suggesting an adaptive immune response mechanism of tumor cell killing. In APOBEC tumors  
251 harvested from immunodeficient NSG mice, in contrast, the DNA repair pathway was significantly  
252 enriched by GSEA (Fig. 3B, Supplementary Fig. S6C), possibly due to the activation of repair  
253 pathways following the generation of A3B-catalyzed uracil lesions in the genome.

254           Given that antigen presentation pathways were upregulated in APOBEC tumors, we were  
255 next interested in studying tumor-specific antigen responses in APOBEC tumors. To gain insight  
256 into these responses, we assessed changes in the T cell repertoire between control and APOBEC  
257 tumors using T cell receptor (TCR)-sequencing. RNA was extracted from control and APOBEC  
258 tumors growing in wildtype mice and used for TCR library preparation and sequencing of the  $\beta$   
259 chain. The CDR3 variants were interrogated and unique clonotypes were counted. APOBEC  
260 tumors had more unique TCR clonotypes than control tumors (Fig. 3C, D). Using the Shannon  
261 entropy diversity index to measure the diversity richness of the clonotypes in the population, we  
262 found that APOBEC tumors had a higher clonotype diversity than control tumors (Fig. 3E).  
263 Finally, we used the diversity evenness 50 ( $DE_{50}$ ) ratio, which is a measure of the number of  
264 clonotypes making up the top 50% of reads relative to the total number of reads, to assess clonotype  
265 evenness. A high  $DE_{50}$  ratio indicates that clonotypes are evenly represented in the population,  
266 whereas a low  $DE_{50}$  ratio corresponds to a TCR repertoire that is dominated by specific CDR3  
267 clonotypes. This analysis indicated that APOBEC tumors had a lower  $DE_{50}$  ratio than control  
268 tumors (Fig. 3F). Taken together, these analyses indicate that the TCR repertoire of APOBEC  
269 tumors exhibit increased diversity richness but decreased diversity evenness; interestingly, this  
270 pattern has been associated with productive T cell responses with antitumor effects and successful  
271 treatment with immunotherapy (48).

272           Tumor antigen-specific responses were examined by isolating splenocytes from APOBEC-  
273 tumor bearing mice and co-culturing the cells with autologous tumor cell lysate for 48 hours. Re-  
274 stimulation responses were measured by  $IFN\gamma$  ELISpot. Autologous APOBEC tumor lysate was  
275 capable of re-stimulating splenocytes from APOBEC-tumor bearing mice to produce  $IFN\gamma$  at  
276 comparable levels to that of naïve splenocytes (NS) stimulated with model antigen, concanavalin

277 A (ConA; Fig. 3G). Thus, A3B-mediated mutagenesis may lead to the generation of tumor-specific  
278 antigens which are targeted by T cells.

279

### 280 **CD4<sup>+</sup> T cells are required for the tumor growth defect of APOBEC tumors**

281 To explore the requirement for T cells in mediating the antitumor immune response against  
282 APOBEC tumors, we depleted CD8<sup>+</sup> T cells in APOBEC tumor-bearing mice using an anti-CD8  
283 depleting antibody. We confirmed that CD8<sup>+</sup> T cells were completely depleted in the peripheral  
284 blood using flow cytometry, and in the tumor at endpoint using qRT-PCR (Supplementary Fig.  
285 S7A-C). Interestingly, the growth defect of APOBEC tumors was not rescued upon CD8<sup>+</sup> T cell  
286 depletion alone (Supplementary Fig. S7D). We next depleted CD8<sup>+</sup> T cells and CD4<sup>+</sup> T cells  
287 simultaneously (Supplementary Fig. S7E-G). In the absence of both CD4<sup>+</sup> and CD8<sup>+</sup> T cells, the  
288 APOBEC tumor growth defect was completely rescued, and APOBEC tumors grew similarly to  
289 the control tumors (Fig. 3H). Control or CD4/CD8-depleted tumors were harvested to assess major  
290 histocompatibility complex class I (MHC-I) expression on tumor cells. In the presence of T cells,  
291 APOBEC tumors had higher expression of MHC-I on tumor cells compared to control tumors. In  
292 contrast, when T cells were depleted, MHC-I expression on tumor cells was abrogated (Fig. 3I, J).  
293 Together, these results reveal that T cells are required for MHC-I upregulation and slowed tumor  
294 growth in APOBEC tumors.

295

### 296 **APOBEC activity renders murine HER2-driven breast tumors responsive to immune** 297 **checkpoint inhibition**

298 Because we found that A3B expression stimulated a T cell-mediated antitumor immune  
299 response, we next asked if APOBEC activity renders the tumors responsive to checkpoint

300 inhibition. SMF-A3B cells were implanted in the mammary glands of wildtype mice and mice  
301 were administered dox water or control water. When control and APOBEC tumors reached 5 mm  
302 in diameter, mice were treated with combination anti-PD-1 and anti-CTLA-4 therapy twice  
303 weekly. Control tumors did not benefit from checkpoint inhibition, consistent with the clinical  
304 observation that checkpoint inhibition is not been effective in HER2<sup>+</sup> breast cancer patients. In  
305 contrast, APOBEC tumor growth was significantly blunted upon treatment with anti-PD-1/anti-  
306 CTLA4 therapy (Fig. 4A). We defined a complete response (CR) as a full tumor regression (-100%  
307 change in tumor volume from the treatment start) and a partial response (PR) as any reduction in  
308 tumor volume from the treatment start. Checkpoint inhibitor treatment led to a partial response in  
309 only 1 of the 13 control tumors (Fig. 4B, Supplementary Fig. S8A). In contrast, 7 out of 11  
310 APOBEC tumors had a complete or partial response to combination checkpoint inhibition (Fig.  
311 4B, Supplementary Fig. S8A). Interestingly, both control and APOBEC tumors did not respond to  
312 anti-PD-1 monotherapy (Supplementary Fig. S8B). These results show that APOBEC activity  
313 sensitized HER2-driven murine breast cancers to combination anti-PD-1/anti-CTLA-4 checkpoint  
314 inhibition, but not single agent therapy.

315

### 316 **APOBEC-mediated genetic heterogeneity permits immune escape, while clonal APOBEC** 317 **tumors remain in cancer-immune equilibrium**

318 Genomic studies of human cancer suggest that episodic APOBEC mutagenesis may fuel  
319 cancer heterogeneity and evolution (49–51). In melanoma and NSCLC, mutational and neoantigen  
320 heterogeneity reduces antitumor immunity (52–54) and response to checkpoint inhibitor therapy.  
321 For instance, lung tumors with more clonal neoantigens are better controlled by neoantigen-  
322 specific T cells and have improved responses to checkpoint inhibitors (55). The role of intratumor

323 diversity in breast cancer immunogenicity has yet to be thoroughly studied. Thus, we were  
324 interested in understanding the consequences of APOBEC-mediated genetic heterogeneity on  
325 antitumor immunity and mammary tumor growth in immunocompetent mice.

326 To assess differences between heterogenous and clonal APOBEC tumors, SMF-A3B cells  
327 were cultured with dox for 2 weeks to mutagenize and induce genetic heterogeneity in the  
328 population of cells, and then dox was removed to downregulate A3B. These cells are referred to  
329 as “parental APOBEC”, whereas the control, non-mutagenized cells are referred to as “parental  
330 control”. We next derived single-cell clones by limiting dilution from the parental APOBEC and  
331 parental control populations. We screened several clonal populations for the ability to grow at the  
332 same rate as parental populations *in vitro*. Control clone 1 and APOBEC clone 1 grew slower than  
333 the parentals, while control clone 2 and APOBEC clone 2 grew at the same rate as parentals (Fig.  
334 5A). When we implanted the clones in immunocompromised, athymic nude mice and measured  
335 tumor growth, only control clone 2 and APOBEC clone 2 were able to form tumors similarly to  
336 the parental counterparts (Fig. 5B). Therefore, we proceeded to study the tumor growth of control  
337 clone 2 and APOBEC clone 2 in immunocompetent, wildtype mice. While control clone 2 grew  
338 similarly to the parentals, APOBEC clone 2 cells gave rise to very small tumors that remained in  
339 a cancer-immune equilibrium until the animals were sacrificed (Fig. 5C). When we compared the  
340 average size of tumors formed in the presence or absence of the adaptive immune response, we  
341 found tumors formed from APOBEC clone 2 were significantly smaller in wildtype mice (Fig.  
342 5D). Thus, APOBEC-mediated heterogeneity may limit the potential of a fully productive immune  
343 response against hypermutated breast tumors. In contrast, clonal APOBEC tumor growth may be  
344 controlled in cancer-immune equilibrium.

345

346 **The APOBEC mutational signature is associated with an adaptive immune response in basal-**  
347 **like but not HER2-enriched human breast cancers**

348 We were next interested in determining whether human breast tumors with APOBEC  
349 mutagenesis have evidence of an increased adaptive immune response. To do this, we analyzed  
350 breast tumors from TCGA for which both whole-exome sequencing (WES) and RNA-sequencing  
351 data were available. To assess the enrichment of APOBEC mutational signatures, we analyzed  
352 WES data using an established algorithm that quantifies the enrichment of C-to-T or C-to-G  
353 mutations occurring in the TCW context relative to all other cytosine mutations (9) (Fig. 6A).  
354 Similar to previous reports (2,9,12), we found that the HER2-enriched subtype had the highest  
355 median APOBEC enrichment scores and the largest proportion of tumors with enrichment scores  
356 > 2 (Fig. 6A). To estimate immune cell infiltration, we analyzed RNA-seq data for the expression  
357 of individual immune checkpoint genes or immune cell gene signatures (56,57) (Supplementary  
358 Table 1). In this manner, we were able to generate quantitative estimates of APOBEC mutagenesis  
359 and immune cell infiltration within individual tumors (Supplementary Table 2). We first examined  
360 the relationship between APOBEC mutagenesis and the expression of immune signatures in  
361 HER2-enriched and basal-like breast cancers as determined by the PAM50 subtype. The basal-  
362 like category includes most of the TNBCs and is considered the most immunologically active  
363 subtype of breast cancer (58,59). We segregated basal-like and HER2-enriched tumors into  
364 APOBEC-high (Fig. 6B) or APOBEC-low groups (Supplementary Fig. S9A) using an APOBEC  
365 enrichment score cutoff of 2 (60). Hierarchical clustering of tumors based on immune cell  
366 signatures revealed two main clusters in each subtype. Tumors in cluster 1 had high expression of  
367 immune signatures that were reflective of an antitumor adaptive immune response, including type-  
368 1 T helper cells (Th1 cells), activated DCs (aDCs), CD8<sup>+</sup> T cells, cytotoxic cells, interferon



369 signaling pathway (IFN), major histocompatibility complex class II antigen presentation pathway  
370 (MHC-II), and checkpoint genes such as *LAG3*, *PDI*, *PDL1*, *PDL2*, *CTLA4*, and *TIM3*. Tumors  
371 in cluster 2 had low expression of antitumor immune response signatures and high expression of  
372 several immunosuppressive gene signatures, such as macrophages and neutrophils.

373 Nearly all of the APOBEC-high basal-like tumors fell within cluster 1, reflective of an  
374 antitumor adaptive immune response (Fig. 6B). These results are consistent with the well-defined  
375 hot TME of TNBC and their response to immune checkpoint inhibition. Surprisingly, in contrast  
376 to basal-like tumors, half of the APOBEC-high HER2-enriched tumors fell within cluster 1 and  
377 half within cluster 2 (Fig. 6B).

378 To further explore the differences in immune cell gene expression signatures between  
379 basal-like, HER2-enriched, and luminal A/B tumors, we analyzed the correlation between the  
380 APOBEC signature enrichment score and each immune cell gene signature, as measured by a  
381 quantitative score (Supplementary Table 3). This analysis showed that the correlation between  
382 APOBEC signatures and immune cell infiltration varied by breast cancer subtype. In the basal-like  
383 subtype, APOBEC signature enrichment score was positively correlated with numerous adaptive  
384 immune response gene signatures (e.g. MHC-II, aDCs, IFN, Th1 cells) and checkpoint genes (e.g.  
385 *PDL1*, *TIM3*, *CTLA4*), and negatively correlated with known immunosuppressive cell types  
386 (macrophages, neutrophils) (Fig. 6C). Luminal A and B subtypes showed similar patterns of  
387 correlation between APOBEC enrichment and immune signatures (Fig. 6C). In contrast, all but  
388 one of the immune signatures (T<sub>cm</sub>, T central memory cells), did not significantly correlate with  
389 APOBEC enrichment score in the HER2-enriched subtype, despite this subtype possessing the  
390 highest median APOBEC enrichment scores (Fig. 6C). In summary, the APOBEC mutational

391 signature is associated with antitumor adaptive immunity gene expression in basal-like breast  
392 cancer patients, but there was no evidence of association in HER2-enriched patients.

393

394 **APOBEC-high HER2-enriched tumors in cluster 2 have increased subclonal mutations**  
395 **compared to tumors in cluster 1**

396 To understand the differences in immune infiltration between APOBEC-high HER2-  
397 enriched tumors in cluster 1 and 2, we first examined clinical features of tumors from each cluster.  
398 There were no statistically significant differences in estrogen receptor status, p53 status by IHC,  
399 node positivity, risk of recurrence, or pathological stage between cluster 1 and 2 of APOBEC-high  
400 HER2 tumors (data not shown). Next, in light of previous findings that tumors with more subclonal  
401 mutations have a less productive immune response (52–55), we postulated that genetic  
402 heterogeneity may underly the TME differences between APOBEC-high basal-like and HER2-  
403 enriched tumors. To test this, we used the clonal phylogenies of TCGA breast cancers generated  
404 by Raynaud and colleagues (61) to explore the relationship between subclonal mutations and  
405 immunogenicity in human breast cancer. The HER2-enriched subtype is characterized as the breast  
406 cancer subtype with the highest levels of intratumor heterogeneity, as measured by number of  
407 clones in the tumor phylogeny (61). Further, HER2<sup>+</sup> breast cancers have increased allelic  
408 imbalance and chromosomal instability compared to HER2-negative tumors (62).

409 We compared the number of subclonal mutations between tumors with a hot TME (cluster  
410 1) and tumors with a cold TME (cluster 2). Interestingly, in HER2-enriched tumors, APOBEC-  
411 high tumors in cluster 2 had more subclonal mutations than APOBEC-high tumors in cluster 1  
412 (Fig. 6D), despite the fact that the APOBEC enrichment scores were similar between these two  
413 groups (Supplementary Fig. S9B). This suggests that the immunogenicity of APOBEC-high

414 tumors between breast cancer subtypes may be due to the levels of intratumor genetic diversity.  
415 Basal-like tumors are less heterogenous and have lower APOBEC enrichment scores on average  
416 than HER2-enriched tumors. Conversely, HER2-enriched tumors with high APOBEC enrichment  
417 scores and high levels of genetical heterogeneity may undergo immune escape and acquire a cold  
418 TME.

419

## 420 **DISCUSSION**

421 APOBEC mutational signatures have been identified in more than 22 different cancer types  
422 (9,10), but the functional consequences of APOBEC activity on the tumor immune  
423 microenvironment have not been explored. Here we show that APOBEC activity promotes an  
424 immunologically hot, infiltrated-inflamed tumor microenvironment, leading to slowed tumor  
425 growth. We find that the slowed growth of APOBEC tumors is due to an adaptive immune-  
426 mediated mechanism that requires the activity of CD4<sup>+</sup> T cells. APOBEC tumors exhibit a T cell-  
427 dependent upregulation of MHC-I expression on tumor cells, and this is associated with increased  
428 TCR diversity within tumors. Consistent with increased immune cell infiltration, APOBEC tumors  
429 are sensitive to checkpoint inhibitors. While other studies have examined how APOBEC  
430 mutagenesis sensitizes tumors to checkpoint inhibitors, this is the first study to our knowledge to  
431 comprehensively define the direct consequences of APOBEC activity on the tumor immune  
432 microenvironment in the absence of therapy.

433 The role of CD4<sup>+</sup> T cells in the APOBEC-dependent antitumor immune response is  
434 intriguing and opens up the possibility for CD4<sup>+</sup> T cell-directed therapies, such as CTLA-4  
435 inhibitors or CD4<sup>+</sup> T cell adoptive transfer, to treat APOBEC-high patients. In a recent study of  
436 murine APOBEC3-mutagenized models of TNBC, the function of T follicular helper cells in

437 activating B cells and antibody generation was found to be required for sensitivity to anti-CTLA-  
438 4/anti-PD-1 checkpoint blockade (31). Our work shows that A3B activity sensitizes HER2-driven  
439 mammary tumors to anti-CTLA-4/anti-PD-1 combination therapy, while anti-PD-1 monotherapy  
440 alone was ineffective. Similarly, Hollern and colleagues found that single-agent anti-PD-1 was  
441 inferior to the combination therapy for TNBC (31). Thus, while the majority of immunotherapy  
442 trials focus on re-invigorating CD8<sup>+</sup> cytotoxic T cells, our findings and others suggest that  
443 harnessing the activity of CD4<sup>+</sup> helper T cells may be more beneficial for breast tumors with  
444 APOBEC mutational signatures.

445         At the same time that APOBEC-catalyzed mutations may promote immunogenicity,  
446 APOBEC activity can also generate genetic heterogeneity and fuel tumor evolution (7,63). For  
447 example, extensive evidence of APOBEC mutagenesis was found in lung cancers harboring the  
448 highest burden of subclonal mutations (50), and more than 45% of subclonal mutations in cancer  
449 genes could be explained by APOBEC mutagenesis (51). While there is growing interest in  
450 understanding how intratumor genetic diversity impacts productive immune responses, little is  
451 known about the effects of APOBEC-catalyzed subclonal diversification on tumor  
452 immunogenicity. When we examined the relationship between APOBEC mutagenesis and  
453 immunogenicity in human breast cancers, we observed a strong correlation between APOBEC  
454 enrichment scores and immune cell gene signatures in basal-like tumors, consistent with findings  
455 in other tumor types (60,64,65). In contrast, there was no correlation between APOBEC  
456 enrichment and immune cell signatures in HER2-enriched breast cancers. In fact, half of HER2-  
457 enriched tumors with high APOBEC enrichment scores (cluster 2) had low expression of adaptive  
458 immune signatures. At first glance, this was a surprising result – especially in light of our finding  
459 that APOBEC activity promotes immune infiltration in HER2-driven mouse mammary tumors –

460 and suggested that cluster 2 tumors may have evolved immune-suppression mechanisms that limit  
461 an antitumor adaptive immune response. While the details of such mechanisms remain unknown,  
462 initial insight came from examining the frequency of subclonal mutations in these tumors. Among  
463 APOBEC-high tumors, immune-suppressed (cluster 2) tumors had a higher number of subclonal  
464 mutations than immune-infiltrated (cluster 1) tumors. These results are reminiscent of findings  
465 from other groups. For instance, in lung cancer, high clonal neoantigen burden is associated with  
466 neoantigen-reactive T cells and improved immunotherapy response (55). In breast cancer, tumors  
467 with high levels of heterogeneity have less infiltration of antitumor immune cells, including CD8<sup>+</sup>  
468 and CD4<sup>+</sup> T cells, lower expression of PD-L1, and lower expression of cytolytic enzymes,  
469 granzyme A and perforin-1 (66). These results suggest that a subset of APOBEC-high HER2  
470 tumors with a high frequency of subclonal mutations can evade immune activation. These results  
471 mirror our findings in mouse tumors, where clonal APOBEC tumors are controlled by the immune  
472 system more profoundly than polyclonal APOBEC tumors. We propose a model (Supplementary  
473 Fig. S9C), where APOBEC mutagenesis leads to immune infiltration and immunotherapy benefit  
474 in both mouse models and human breast tumors yet can also foster subclonal diversification to  
475 promote evasion of the immune response.

476 Therefore, to exploit the immunogenic nature of APOBEC mutations without allowing  
477 acceleration of the aggressiveness of the tumor, immunotherapy could be used early on to target  
478 the subclones already harboring APOBEC-catalyzed neoantigens and prevent further  
479 diversification. In fact, clinical trials of immunotherapy in breast cancer show that tumors respond  
480 better when administered in earlier lines of therapy (reviewed by (20)). Given our findings, prior  
481 evidence in murine models (31,32), and human genomic studies implicating APOBEC  
482 mutagenesis in immune infiltration (60,64,65) and immunotherapy response (27–30,67),

483 endogenous APOBEC mutagenesis may render human tumors responsive to immunotherapy.  
484 Thus, APOBEC mutational signatures and mutational clonality may be useful biomarkers  
485 predicting response to immunotherapy in women with breast cancer. This is particularly notable  
486 for HER2<sup>+</sup> breast cancer, because while the majority of reports of durable clinical benefit and  
487 newly initiated immunotherapy trials are for TNBC (reviewed by (20)), HER2<sup>+</sup> breast cancers have  
488 the highest median levels of APOBEC enrichment compared to other breast cancer subtypes.

489 Finally, our findings that APOBEC activity slows the growth of polyclonal tumors through  
490 an antitumor immune-mediated response are in contrast to a recent study of another mutational  
491 process, showing that UVB-derived mutational heterogeneity reduces antitumor immunity and  
492 generates highly aggressive tumors that grow faster than non-mutagenized tumors (54).  
493 Interestingly, the UVB mutational signature does not predict response to checkpoint blockade in  
494 melanoma patients (29). This raises the possibility that APOBEC-mediated mutagenesis is a  
495 particularly immunogenic mutational process, compared to other mutagens, such as UVB  
496 irradiation, or a general increase in the TMB. For instance, APOBEC SBS signature 13, but not  
497 overall TMB, correlates with immune response-specific gene expression in breast cancer (64).  
498 Additionally, the APOBEC mutational signature is a better predictor of durable clinical benefit to  
499 immunotherapy than total TMB in NSCLC (28). Lastly, in a cohort of patients with diverse cancer  
500 types, APOBEC signatures correlate with improved immunotherapy response, independent of  
501 TMB (27). It is possible that APOBEC-mediated mutations generate neoantigens that are  
502 particularly immunogenic (e.g. with increased hydrophobicity (27)) or are more likely to occur in  
503 highly expressed genes or regions of open chromatin (e.g. R-loops (68,69)), although human data  
504 shows an inverse correlation between C-to-T mutations and gene expression (1). Future work

505 should focus on the mechanism by which the APOBEC mutational process generates  
506 immunogenic neoantigens.

## 507 MATERIALS AND METHODS

### 508 Tissue culture and reagents

509 All cell lines were grown at 37°C in 5% CO<sub>2</sub>. SMF cells were provided by Dr. Lewis  
510 Chodosh (University of Pennsylvania) and were cultured in Dulbecco's Modified Eagle Medium  
511 (DMEM), 10% fetal bovine serum (FBS), 1% L-glutamine (Gibco 25030-081), 1%  
512 penicillin/streptomycin (Gibco 15140-122), and 5 µg/mL insulin (Gemini Bioproducts 700-112P).  
513 EMT6 cells were provided by the Duke Cell Culture Facility and were cultured in Waymouth's  
514 Medium 752/1, 15% FBS, 1% L-glutamine, and 1% penicillin/streptomycin. BT474 cells were  
515 cultured in RPMI-1640, 10% FBS, 1% L-glutamine, and 1% penicillin/streptomycin. SKBR3 cells  
516 were cultured in DMEM, 10% FBS, 1% L-glutamine, and 1% penicillin/streptomycin. SMF-A3B  
517 cells were selected in 1 µg/mL puromycin (Sigma P8833-10MG) and 1 mg/mL neomycin (G418,  
518 Sigma, 345810-1GM). EMT6-A3B cells were selected in 4 µg/mL puromycin and 1 mg/mL  
519 neomycin. Doxycycline (RPI D43020-100.0) was added to the cell medium to induce the  
520 expression of A3B where specified at concentrations described. Cells were harvested for qRT-  
521 PCR, deaminase activity assay, or Western blot analysis.

522 Cell viability assays were performed using CellTiter-Glo (Promega) according to  
523 manufacturer instructions. Cells were plated at 2,000 cells per well in an opaque 96-well plate and  
524 treated with doxycycline on day 0. Doxycycline in cell medium was refreshed every 3 days.

525 Colony formation assays were performed by plating cells at 2,000 cells per 10-cm plate  
526 and cultured with doxycycline for 14 days. Doxycycline in cell medium was refreshed every 3  
527 days. PBS was used to wash plates and 0.5% crystal violet in 25% methanol was used to stain cell  
528 colonies for 5 mins. The plates were dried overnight and imaged. Colonies were quantified using  
529 ImageJ Fiji.



530 For immunofluorescence staining of adherent cells,  $5 \times 10^4$  cells per well were plated on  
531 coverslips with 0.1% gelatin in a 24-well plate.  $1 \mu\text{g/mL}$  doxycycline was added, and cells were  
532 cultured for 3 days prior to fixation in 4% paraformaldehyde. Coverslips were washed in PBS,  
533 permeabilized in 0.5% Triton-X 100, washed in PBS, and blocked in 3% BSA and 10% normal  
534 goat serum for 1 hour at room temperature. Coverslips were incubated with 1:800 HA-tag rabbit  
535 (Cell Signaling 3724S) primary antibody overnight at  $4^\circ\text{C}$ , washed, and incubated in with 1:500  
536 goat anti-rabbit AF488 (Life Technologies A1103) secondary antibody for 1 hour at room  
537 temperature. Coverslips were then washed in PBS, stained with DAPI for 10 minutes, and mounted  
538 on slides with Prolong Gold (Thermo P36930). Slides were imaged Zeiss Axio Imager Widefield  
539 fluorescence microscope.

#### 540 **Plasmids and viral transduction**

541 To generate dox-inducible A3B expression in murine cancer cell lines, a 2-vector system  
542 was utilized. pLVX-Tet-On Advanced plasmid containing the rtTA cassette was provided by Dr.  
543 Ann Marie Pendergast (Duke University). pLenti-Tet-On-A3B plasmid containing tetracycline  
544 responsive human APOBEC3B gene (NM\_004900.4) that is HA-tagged on the C-terminus was  
545 generated by VectorBuilder. The APOBEC3B gene contains an in-frame 66 bp SV40 T-antigen  
546 intron sequence to disrupt transcription of the gene in *E. coli* for successful cloning without  
547 introducing A3B-catalyzed mutations in the construct sequence. To generate the catalytically  
548 inactive mutant of A3B (E255Q), site-directed mutagenesis of the pLenti-Tet-On-A3B plasmid  
549 was performed by Genewiz. HEK293T cells were transfected with psPAX2 and pMDG.2  
550 packaging plasmids (gifts from Didier Trono, EPFL, Lausanne, Switzerland; Addgene plasmids  
551 12559 and 12660), the lentiviral expression plasmid, PLUS reagent (Thermo 11514015), and  
552 Lipofectamine 2000 (Thermo 11668019). 0.8 mM sodium butyrate was added to cell medium 1-

553 and 2-days post-transfection to prevent epigenetic silencing of the lentiviral vector. Lentivirus was  
554 collected in the supernatant and filtered prior to concentrating with Lenti-X™ Concentrator  
555 (Clontech 631231) manufacturer protocol.

556 To generate SMF-A3B and EMT6-A3B cell lines, SMF cells and EMT6 cells were  
557 transduced at 50% confluency in 6-well plates with 1 mL of concentrated lentivirus and 6  $\mu$ g/mL  
558 polybrene (Sigma 107689) at 1000xg and 33°C for 2 hours. Cells transduced with pLVX-Tet-On  
559 Advanced lentivirus were selected in neomycin for at least 10 days. Cells were then transduced  
560 with pLenti-Tet-On-A3B lentivirus and selected in puromycin for an additional 14 days.

### 561 **Animal work**

562 Animal care and animal experiments were performed with the approval of, and in  
563 accordance with, guidelines of the Duke University IACUC. Mice were housed under barrier  
564 conditions with 12-hour light/12-hour dark cycles. Female FVB mice (FVB/NJ; used with SMF  
565 cells) and female BALB/c mice (BALBc/J; used with EMT6 cells) were obtained from The  
566 Jackson Laboratory. Female outbred athymic nude mice (J:NU) and female NOD.Cg-*Prkdc*<sup>scid</sup>  
567 *Il2rg*<sup>tm1Wjl</sup>/SzJ (NSG) mice were obtained from The Jackson Laboratory.

568 Tumor cell lines were implanted in bilateral 4<sup>th</sup> inguinal mammary fat pads of 6-8 week old  
569 female recipient mice. 2x10<sup>6</sup> SMF-A3B cells or 2x10<sup>4</sup> EMT6-A3B cells in complete cell medium  
570 were used for implantation. Tumors were monitored for growth, measured using calipers 2-3 times  
571 per week, and sacrificed at experimental endpoint or when tumors reached 10-15 mm in diameter.  
572 Tumor volume was calculated using  $(L*W*W*\pi)/6$ , where L is length of the longer side and W is  
573 length of the shorter side. Where indicated, 1 mg/mL of doxycycline supplemented with 5%  
574 sucrose was added to mouse drinking water 2 days prior to tumor cell implantation.

575 *In vivo* depletion antibodies were administered via intraperitoneal injected on day -2 and -  
576 1 prior to implantation, then continued twice weekly until endpoint. 300  $\mu$ g of anti-CD8 (BioXCell  
577 BE0117), or 300  $\mu$ g of anti-IgG2b isotype control (BioXCell BE0090), was used for CD8  
578 depletion alone. 200  $\mu$ g of anti-CD8 (BioXCell BE0117) and 200  $\mu$ g of anti-CD4 (BioXCell  
579 BE0003-1), or 400  $\mu$ g of anti-IgG2b isotype control (BioXCell BE0090), was used for CD8/CD4  
580 dual depletion. For anti-PD-1 monotherapy, antibodies were administered when the majority of  
581 tumors reached 5 mm in diameter, for a total of 3 doses in one week (day 13, 15, 17) and 3 doses  
582 in the next week (day 20, 22, 24). 200  $\mu$ g of anti-PD-1 (BioXCell BE0146), or 300  $\mu$ g of anti-  
583 IgG2b (BioXCell BE0090), was used for monotherapy. For combination anti-PD-1/anti-CTLA-4  
584 therapy, antibodies were administered when the majority of tumors reached 5 mm in diameter and  
585 continued twice weekly until endpoint. 200  $\mu$ g of anti-PD-1 (BioXCell BE0146) and 200  $\mu$ g of  
586 anti-CTLA-4 (BioXCell BE0164), or 400  $\mu$ g of anti-IgG2b isotype control (BioXCell BE0090),  
587 was used.

## 588 **Flow cytometry**

589 Bilateral tumors were harvested and aggregated for each mouse, then minced into small  
590 chunks. Tumor chunks were digested with warmed digestion buffer containing 300 U/mL  
591 collagenase (StemCell 554656) and 100 U/mL hyaluronidase (StemCell 554656) at 37 °C for 1  
592 hour, vortexing every 15 minutes. Digested tumors were incubated in ACK lysis buffer for 5  
593 minutes to lysis red blood cells. Tumors were centrifuged, washed in stain buffer (BD Biosciences  
594 554656), decanted, and resuspended in Dispase II (5 mg/mL; StemCell 7913) and DNase I (100  
595  $\mu$ g/mL; Worthington Biochemical LS002006) for 5 minutes, mixing. Tumors were then passed  
596 through 70  $\mu$ m strainer, washed in stain buffer, counted, and  $1 \times 10^6$  cells in 100  $\mu$ L of stain buffer  
597 were added to 96-well untreated v-bottom plate for staining. Prior to intracellular antigen staining,

598 cells were activated using 2  $\mu$ L of leukocyte activation cocktail with GolgiPlug (BD Biosciences  
599 550583) for 3 hours at 37°C and 5% CO<sub>2</sub>.

600 LIVE/DEAD™ Fixable Aqua Dead Cell Stain Kit (Thermo L34957) was used to stain dead  
601 cells in PBS according to manufacturer protocol for 30 minutes at 4°C in the dark. Cells were  
602 washed in PBS three times and resuspended in 100  $\mu$ L of PBS for antibody surface staining. 2  $\mu$ L  
603 of CD16/CD32 Fc Block antibody (BD Biosciences 553141) was added for 10 minutes at 4°C in  
604 the dark. Surface antigen antibodies were added at dilutions listed below and incubated for 30  
605 minutes at 4°C in the dark. Cells were washed in PBS and transferred to falcon tubes for analysis.

606 For intracellular antigen staining, cells were fixed in either Foxp3 fixation buffer (BD  
607 Biosciences 560409) or BD Cytfix™ Fixation Buffer (BD Biosciences 554655) for 30 minutes  
608 at 4°C in the dark. Cells were washed and stored at 4°C in the dark overnight. Cells were  
609 permeabilized in either Foxp3 permeabilization buffer (BD Biosciences 560409) for 30 minutes  
610 at 37°C or BD perm/wash buffer for 15 minutes at 4°C. Cells were washed in PBS and resuspended  
611 in 100  $\mu$ L of PBS for intracellular antigen staining using the antibody dilutions listed below and  
612 incubated for 25 minutes at room temperature in the dark. Cells were washed in PBS and  
613 transferred to falcon tubes for analysis.

614 Cells were analyzed using a FACSCanto analyzer (BD Biosciences) and data were  
615 analyzed using FlowJo software (TreeStar, Ashland, OR). Fluorescence minus one (FMO; all  
616 antibodies in the panel, except for one) was used to determine proper gating of individual cell  
617 types. Individual cell type compartments were represented as either the percentage of total CD45<sup>+</sup>  
618 cells or the percentage of total live cells. Treg and Th2 cell compartments were represented as  
619 percentage of total CD4<sup>+</sup> T cells. The correlation between immune cell frequency and tumor  
620 volume was calculated using the mean volume of bilateral tumors at endpoint.

| Marker/Cell Type     | Antigen        | Fluorophore | Clone       | Vendor    | Catalog Number | Dilution |
|----------------------|----------------|-------------|-------------|-----------|----------------|----------|
| PD-L1                | PD-L1 (CD274)  | BV421       | MIH5        | BD        | 564716         | 1:100    |
| PD-1                 | PD-1 (CD279)   | AF647       | RMP1-30     | BD        | 566715         | 1:20     |
| Dendritic Cell       | CD11c          | PECy7       | HL3         | BD        | 558079         | 1:100    |
| Dendritic Cell       | MHC-II I-A I-E | AF488       | M5/114.15.2 | BD        | 562352         | 1:100    |
| Dendritic Cell       | CD103          | PE          | M290        | BD        | 561043         | 1:100    |
| Epithelial Cell      | EpCAM (CD326)  | FITC        | G8.8        | Biologend | 118207         | 1:500    |
| Leukocyte            | CD45           | PECy5       | 30-F11      | BD        | 561870         | 1:200    |
| Leukocyte            | CD45           | PECy7       | 30-F11      | BD        | 552848         | 1:200    |
| Leukocyte            | CD45           | APC         | 30-F11      | BD        | 561870         | 1:200    |
| Leukocyte            | CD45           | V450        | 30-F11      | BD        | 560501         | 1:200    |
| Leukocyte            | CD45           | PE          | 30-F11      | BD        | 561087         | 1:500    |
| Leukocyte            | CD45           | PerCP-Cy5.5 | 30-F11      | BD        | 550994         | 1:200    |
| Macrophage           | F4/80          | APC         | BM8         | BioLegend | 123116         | 1:50     |
| Macrophage           | F4/80          | AF647       | T45-2342    | BD        | 565853         | 1:50     |
| Monocyte             | CD11b          | PE          | M1/70       | BD        | 561689         | 1:50     |
| Monocyte             | CD11b          | PECy7       | M1/70       | BD        | 561098         | 1:100    |
| Monocyte             | CD11b          | APCCy7      | M1/70       | BD        | 557657         | 1:100    |
| NK Cell              | NK1.1          | APC         | PK136       | BD        | 561117         | 1:100    |
| NK Cell              | CD49b          | APC         | DX5         | BioLegend | 108909         | 1:50     |
| T Cell               | CD3e           | PECy7       | 145-2C11    | BD        | 561100         | 1:100    |
| T Cell               | CD3e           | PE          | 145-2C11    | BD        | 561824         | 1:100    |
| T Cell               | CD3e           | PerCP-Cy5.5 | 145-2C11    | BD        | 561108         | 1:100    |
| T Cell               | CD4            | APCCy7      | GK1.5       | BD        | 561830         | 1:100    |
| T Cell               | CD8a           | APC         | 53-6.7      | BD        | 561093         | 1:200    |
| T Cell               | CD8a           | AF488       | 53-6.7      | BD        | 557668         | 1:100    |
| T Cell               | Foxp3          | AF488       | MF23        | BD        | 560407         | 1:200    |
| T Cell               | Tbet           | BV421       | O4-46       | BD        | 563318         | 1:100    |
| T Cell               | Gata3          | AF647       | L50-823     | BD        | 560068         | 1:200    |
| T Cell               | IL-4           | APC         | 11B11       | Biologend | 504105         | 1:100    |
| Granzyme B           | Granzyme B     | FITC        | GB11        | BD        | 515403         | 1:50     |
| Interferon- $\gamma$ | IFN $\gamma$   | BV421       | XMG1.2      | BD        | 563376         | 1:40     |
| Fc Block             | CD16/CD32      | -           | 2.4G2       | BD        | 553141         | 1:50     |

621

## 622 qRT-PCR and Western blotting

623 RNA was extracted, cDNA generated, and gene expression level determined by qRT-PCR

624 as previously described in (70). Taqman Probes (Thermo 4331182): APOBEC3B,

625 Hs00358981\_m1; ACTB, Hs01060665\_g1; Actb, Mm02619580\_g1; Foxp3, Mm00475162\_m1;  
626 Gzma, Mm01304452\_m1; Tbx21, Mm00450960\_m1; Prf1, Mm00812512\_m1. mRNA  
627 expression was normalized to  $\beta$ -actin and presented as the relative fold change. To compare A3B  
628 expression levels between murine cell lines (SMF-A3B and EMT6-A3B) and human cell lines  
629 (BT474), A3B expression was not normalized to account for differences in  $\beta$ -actin expression  
630 between mouse and human cells; fold change of relative Ct value was presented.

631 For Western blotting, cells were treated doxycycline as described and harvested. Cells were  
632 lysed in RIPA buffer and 1x Halt Proteinase/Phosphatase Inhibitor (Invitrogen 78444). Protein  
633 concentration in the supernatant was determined by Bradford assay. Laemmli Sample Buffer  
634 (BioRad 1610747) was added to diluted protein samples and denatured at 95°C for 5 minutes. 20  
635  $\mu$ g of denatured protein was loaded into wells of 10-15% SDS-PAGE gel and ran at 90-125 V for  
636 1 hour. Gel was transferred to immunoblot membrane using wet transfer at 90 V for 1 hour.  
637 Membranes were incubated with blocking buffer for 1 hour at room temperature and then primary  
638 antibodies at dilutions listed below overnight at 4°C. Membranes were washed in PBS-Tween 20  
639 and incubated with secondary antibodies at dilutions listed below for 1 hour at room temperature  
640 in the dark. Membranes were then washed and imaged using a Li-Cor Odyssey infrared imaging  
641 system and analyzed in ImageStudio Lite software (Li-Cor Biosciences).

| <b>Antibody</b>               | <b>Vendor</b>  | <b>Catalog Number</b> | <b>Dilution</b> |
|-------------------------------|----------------|-----------------------|-----------------|
| HA-tag Rabbit                 | Cell Signaling | 3724S                 | 1:1000          |
| $\alpha$ -Tubulin Mouse       | Cell Signaling | 3873                  | 1:2000          |
| $\gamma$ H2AX (Ser139) Rabbit | Cell Signaling | 2577S                 | 1:1000          |
| H2A Mouse                     | Cell Signaling | 3636S                 | 1:1000          |
| Cleaved PARP (Asp214) Mouse   | Cell Signaling | 9544S                 | 1:1000          |

|                          |        |           |        |
|--------------------------|--------|-----------|--------|
| Goat anti-Mouse IRDye800 | Li-Cor | 926-32210 | 1:5000 |
| Goat anti-Rabbit AF680   | Thermo | A-21076   | 1:5000 |

642

### 643 **Tissues, immunohistochemistry, and immunofluorescence**

644 Tumors were harvested and fixed in 10% normal formalin overnight before paraffin-  
645 embedding for immunohistochemistry by Duke Pathology Research Immunohistology Lab (Duke  
646 University, Durham, NC). Slides were imaged at 4 fields of view per tumor with Zeiss Axio Imager  
647 Widefield fluorescence microscope.

648 Tumors were harvested and frozen in OCT for immunofluorescence staining. Slides were  
649 fixed in 4% paraformaldehyde for 10 minutes. Slides were washed in PBS, permeabilized in 0.5%  
650 Triton-X 100 for 20 minutes, washed in PBS, and blocked in 3% BSA and 10% normal goat serum  
651 for 1 hour at room temperature. Slides were incubated with primary antibodies listed below  
652 overnight at 4°C, washed, and incubated in with secondary antibodies listed below for 1 hour at  
653 room temperature. Slides were then washed in PBS, stained with DAPI for 10 minutes, and  
654 coverslips were mounted on slides with Prolong Gold (Thermo P36930). For  $\gamma$ H2AX foci  
655 quantification, 8 fields of view were imaged per slide with Leica SP5 Inverted Confocal  
656 fluorescence microscope. For assessing expression of HA-tagged A3B in tumors, slides were  
657 imaged with Zeiss Axio Imager Widefield fluorescence microscope. Images were analyzed with  
658 ImageJ Fiji.

| <b>Antibody</b> | <b>Vendor</b>  | <b>Catalog Number</b> | <b>Dilution</b> |
|-----------------|----------------|-----------------------|-----------------|
| CD3 Rabbit      | Thermo         | RM-9107-S             | 1:100 (IHC)     |
| CD45 Rat        | BD Biosciences | 550939                | 1:50 (IHC)      |
| HA-tag Rabbit   | Cell Signaling | 3724S                 | 1:800 (IF)      |

|                               |                   |       |            |
|-------------------------------|-------------------|-------|------------|
| $\gamma$ H2AX (Ser139) Rabbit | Cell Signaling    | 2577S | 1:800 (IF) |
| Goat anti-Rabbit AF488        | Life Technologies | A1103 | 1:500 (IF) |

659

## 660 **Cytidine deaminase activity assay**

661 Cells were treated with doxycycline as described and harvested. Cells were lysed for 10  
662 minutes on ice in 25 mM HEPES (pH7.4, diluted in molecular grade water), 10% glycerol, 150  
663 mM NaCl, 0.5% Triton X-100, 1 mM EDTA, 1 mM MgCl<sub>2</sub>, 1 mM ZnCl<sub>2</sub>, and 1:100 protease  
664 inhibitor (Sigma P8340). Protein concentration of the supernatant was determined using DC™  
665 Protein Assay (BioRad) and manufacturer protocol. 10  $\mu$ g of protein was incubated for 2 hours at  
666 37°C with 4 pmol of oligonucleotide listed below, 0.5  $\mu$ L of uracil DNA glycosylase enzyme (NEB  
667 M0280S), 2  $\mu$ L of 10x uracil DNA glycosylase buffer (NEB M0280S), 2.5  $\mu$ L RNase A (M0280S)  
668 up to a 20  $\mu$ L reaction volume with molecular grade H<sub>2</sub>O. Then 10  $\mu$ L of 1N NaOH was added and  
669 heated to 95°C for 10 minutes to break the DNA backbone. Then 30  $\mu$ L of 2x RNA loading dye  
670 was added and heated to 95°C for 3 minutes to denature the DNA. 15% Urea-TBE-PAGE gel was  
671 made with 3.75 mL of 40% Acryl (29:1), 4.8 g of ultra-pure urea, 1 mL of 10x TBE buffer, 5.25  
672 mL of H<sub>2</sub>O, 99  $\mu$ L of 10% APS, and 4  $\mu$ L of TEMED. 15% Urea-TBE-PAGE gel was prewarmed  
673 for 1 hour at 150 V. 5  $\mu$ L of denatured sample was added per well and ran at 150 V for 30-45  
674 minutes. Gels were imaged with Li-Cor Odyssey infrared imaging system and analyzed in  
675 ImageStudio Lite software (Li-Cor Biosciences) to quantify the percent of deamination.

676 Oligonucleotide containing cytosine:

677 /5IRD700/ATTATTATTATTCAAATGGATTTATTTATTTATTTATTTATTT

678 Positive control oligonucleotide containing uracil:

679 /5IRD700/ATTATTATTATTUAAATGGATTTATTTATTTATTTATTTATTT



## 680 **RNA-sequencing and analysis**

681 RNA was isolated from tumors using the RNeasy kit (Qiagen). RNA was sequenced using  
682 Stranded mRNA-seq libraries and the NovaSeq 6000 S1 sequencing platform with 50 bp paired-  
683 end reads by the Duke GCB Sequencing and Genomic Technologies Shared Resource (Duke  
684 University, Durham, NC).

685 RNA-seq data was trimmed with Trim Galore! (Galaxy Version 0.6.3; Krueger, F.,  
686 Babraham Institute, [http://www.bioinformatics.babraham.ac.uk/projects/trim\\_galore/](http://www.bioinformatics.babraham.ac.uk/projects/trim_galore/)) and then  
687 FastQC (Galaxy Version 0.72+galaxy1; Andrews, S. (n.d.). FastQC A Quality Control tool for  
688 High Throughput Sequence Data. Retrieved from  
689 <http://www.bioinformatics.babraham.ac.uk/projects/fastqc/>) was used to assess quality. Reads  
690 were aligned to the GRCm38 reference mouse genome using RNA STAR (Galaxy Version  
691 2.7.5b)(71) and vM25 annotation file downloaded from the Gencode server. Reads were counted  
692 with featureCounts (Galaxy Version 1.6.4+galaxy2)(72) and differential gene expression analysis  
693 was performed with DESeq2 (Galaxy Version 2.11.40.6+galaxy1)(73).

694 Gene ontology (GO) analysis was performed using GO Ontology database (DOI:  
695 10.5281/zenodo.4033054 Released 2020-09-10)(74,75) for the log<sub>2</sub> fold change of genes with a  
696 FDR adjusted p-value < 0.05. Gene set enrichment analysis (GSEA) was performed using GSEA  
697 v4.1.0(76,77) using preranked gene list and Hallmark v7.2 gene set database at 1,000 permutations.  
698 *In silico* flow cytometry was used to compute immune cell fractions with CIBERSORTx(78) and  
699 the LM22 dataset.

## 700 **T cell receptor-sequencing and analysis**

701 RNA was isolated from tumors using the RNeasy kit (Qiagen) and TCR beta chain libraries  
702 were generated using SMARTer Mouse TCR a/b Profiling Kit (Clontech). Samples were pooled

703 to a final pool concentration of 4 nM and diluted to a final concentration of 13.5 pM, including a  
704 5–10% PhiX Control v3 spike-in. Libraries were sequencing using MiSeq600 v3 300 bp paired-  
705 end reads. MiXCR(79) was used to calculate clonotype frequencies with recommended settings  
706 and vegan R package (Jari Oksanen, F. Guillaume Blanchet, Michael Friendly, Roeland Kindt,  
707 Pierre Legendre, Dan McGlinn, Peter R. Minchin, R. B. O'Hara, Gavin L. Simpson, Peter Solymos,  
708 M. Henry H. Stevens, Eduard Szoecs and Helene Wagner (2020). *vegan: Community Ecology*  
709 *Package*. R package version 2.5-7. <https://CRAN.R-project.org/package=vegan>) was used to  
710 calculate Shannon entropy diversity index.  $DE_{50}$  was calculated as the number of clonotypes  
711 occupying the top 50% of read counts, divided by the total number of read counts.

## 712 **ELISpot**

713 Splens and tumors were harvested from 4 APOBEC tumor-bearing mice. Single cell  
714 splenocytes suspensions were generated and cryopreserved. Tumor chunks were snap-frozen in  
715 liquid nitrogen. For co-culture, splenocytes were thawed at 37°C, washed 3 times in splenocyte  
716 medium (RPMI, 10% FBS, and 1% penicillin/streptomycin), and counted. Tumor chunks were  
717 thawed on ice, lysed using 4 rounds of -80°C freeze/thaw cycles, and protein concentrations were  
718 determined from the supernatant using Bradford assay.  $1 \times 10^6$  splenocytes from APOBEC tumor-  
719 bearing mice were co-cultured for 48 hours with 100  $\mu\text{g/mL}$  of tumor lysate protein.  $2.5 \times 10^5$   
720 splenocytes from naïve mice were co-cultured for 48 hours with 1  $\mu\text{g/mL}$  of concanavalin A as a  
721 positive control or alone as a negative control. Mouse IFN- $\gamma$  ELISpot PLUS kit (MABTECH  
722 3321-4APT-2) manufacturer protocol was followed for development of the spots. Plates were dried  
723 overnight and imaged and quantified using CTL ImmunoSpot 7.0.26.0 software.

## 724 **Bioinformatics analysis of human breast cancers**

725 To estimate immune cell infiltration, we quantified the gene expression of individual  
726 immune checkpoint genes or immune cell gene signatures (56,57) collapsed into one value for  
727 each signature using a PCA-based method (see Supplementary Table 1 for gene lists). Raw gene  
728 counts from RNA-seq experiments for TCGA-BRCA patients were first queried from the National  
729 Cancer Institute Genomic Data Commons (GDC) (80) using the R package TCGAbiolinks  
730 (v2.12.6) (81), and normalized to effective library sizes calculated by the Trimmed Mean of M-  
731 values (TMM) (82) method and transformed by the voom method (83) implemented in the R  
732 packages edgeR (v3.28.0) (84) and Limma (v3.42.0) (85), respectively. For each gene signature,  
733 the first principal component (PC1) of a PCA model was used to summarize the gene expression  
734 values of the signature into a single score.

735 To calculate APOBEC enrichment score, single nucleotide polymorphisms (SNP) data  
736 called by the somatic mutation caller MuTect2 (86) were also queried from the GDC. For each  
737 tumor, an APOBEC mutagenesis enrichment score was calculated based on C>T mutations  
738 occurring in TCW motifs as described by Roberts et al (9).

739 Heatmaps of the relative expression of immune cell gene signatures in APOBEC-high and  
740 APOBEC-low tumors were created using R package Morpheus  
741 (<https://software.broadinstitute.org/morpheus>). Samples were grouped by subtype (HER2-  
742 enriched or basal-like), and Euclidian hierarchical clustering and cutting the dendrogram was used  
743 to identify 2 main immune clusters in the HER2-enriched subtype and 2 main immune clusters in  
744 the basal-like subtype (immune cluster 1 and cluster 2).

745 To measure the correlation of APOBEC enrichment score and immune gene signatures in  
746 samples based on subtype, Spearman's rho was calculated, and the significance was determined

747 by Spearman's rank correlation test. P-values were adjusted for multiple testing using the  
748 Benjamini-Hochberg method to control the false discovery rate.

749 To assess differences in genetic heterogeneity between immune clusters, the number of  
750 subclonal mutations per TCGA sample was downloaded from (61).

### 751 **Gene expression-based classifier of APOBEC mutagenesis**

752 APOBEC enrichment scores were calculated from TCGA tumors as in methods described  
753 above. We performed classification to nearest centroids to identify sets of genes that would  
754 distinguish individuals with high APOBEC enrichment from those without (87). After constructing  
755 a matrix of log-2 transformed, median-centered gene expression values for TCGA-BRCA samples,  
756 we filtered genes to the top 5% most differentially expressed ( $N = 1,026$  genes) between APOBEC-  
757 high and APOBEC-low samples using the samr package (R. Tibshirani, Michael J. Seo, G. Chu,  
758 Balasubramanian Narasimhan and Jun Li (2018). samr: SAM: Significance Analysis of  
759 Microarrays. R package version 3.0. <https://CRAN.R-project.org/package=samr>). We performed  
760 10-fold cross validation by randomly splitting the TCGA samples into 10 groups and training the  
761 classifier on nine of these groups (training set), leaving the remaining group to serve as an internal  
762 validation set (test set). In each of the 10 iterations of training, we varied the number of genes used  
763 to predict each APOBEC group from 1 to 50 and assessed model performance by calculating  
764 sensitivity and specificity in both training and test sets. Mean sensitivity compared to APOBEC  
765 enrichment calls derived from whole-exome-sequencing across each of the 10 folds ranged from  
766 61-71% in training sets, with the maximum test set sensitivity reached at 5 genes per group  
767 (Supplementary Fig. S10A, B). We chose the final number of genes based on the maximum  
768 Youden's index (sensitivity + specificity - 1). The maximum Youden's index for test data was  
769 achieved using 5 genes per group ( $Y = 0.30$ ), suggesting that a 10-gene classifier was optimal for

770 prediction (Supplementary Fig. S10C). Applied to the full TCGA breast cancer cohort, the  
771 predictor achieved 69% sensitivity and 61% specificity against APOBEC enrichment calls from  
772 whole-exome sequencing data, for an overall accuracy of 63% (Supplementary Fig. S10D). This  
773 accuracy is consistent with what would be expected given the observed instability in signature  
774 detection when resampling mutations within an individual, particularly in contexts of low mutation  
775 frequency (41,42). Finally, the expression-based predictor was applied to RNA-seq data from a  
776 sample of 12 mouse tumors from NSG mice (6 A3B-expressing tumors and 6 control tumors) to  
777 classify tumors demonstrating the APOBEC mutational signature. In this instance, sensitivity and  
778 specificity were calculated using A3B/control status as the gold standard.

#### 779 **Statistical reporting**

780 One-way ANOVA and Tukey's multiple comparisons test was used to assess statistical  
781 significance of qRT-PCR gene expression, colony formation assay, and MHC-I expression by flow  
782 cytometry. One-way ANOVA and Sidak's multiple comparisons test were used to assess statistical  
783 significance of the mouse tumor volume on a single day as indicated, differences in APOBEC  
784 enrichment score from human data, and the number of subclonal mutations in immune clusters  
785 from human data. Two-way ANOVA and Dunnett's multiple comparisons test was used to  
786 determine the statistical significance of differential cell growth *in vitro* using CellTiter Glo assay.  
787 Two-way repeated-measures ANOVA and Tukey's multiple comparison was used to measure  
788 statistical significance of changes in tumor volume over time *in vivo*. The adjusted p-values are  
789 reported for each.

790 Fisher's exact test was used to assess differences in response to checkpoint inhibition  
791 (CR/PR by percent change in tumor volume from treatment start day). Student's t-test was used to  
792 test the statistical significance of differences in tumor mass at endpoint, flow cytometry, IHC/IF,

793 and TCR-seq diversity measurements. Student's t-test p-values are reported. Statistical analysis  
794 was performed and graphs were created in R version 4.0.2 or using GraphPad Prism version 8.0.1.

## 795 **Research reproducibility**

796 Source code to reproduce analyses of gene expressed-based APOBEC classifier and to  
797 reproduce analyses of APOBEC enrichment and quantification of immune signature gene  
798 expression is available at <https://github.com/ashleydimarco/alvarezlab-APOBEC>

## 799 **Author contributions**

800 **Ashley V. DiMarco:** conceptualization, data curation, formal analysis, supervision,  
801 validation, investigation, visualization, methodology, writing—original draft, project  
802 administration; **Xiaodi Qin:** data curation, formal analysis, methodology, writing—review and  
803 editing for APOBEC enrichment score, immune gene signatures, and correlation analysis of  
804 TCGA data; **Sarah Van Alsten:** data curation, formal analysis, methodology, writing—review  
805 and editing for gene expressed-based classifier of APOBEC mutagenesis; **Brock McKinney:** data  
806 curation, resources; **Nina Marie G. Garcia:** data curation, writing—review and editing; **Jeremy**  
807 **Force:** methodology; **Brent A. Hanks:** supervision, writing—review and editing for depletion  
808 and checkpoint inhibitor studies; **Melissa A. Troester:** supervision, writing—review and editing  
809 for gene expressed-based classifier of APOBEC mutagenesis; **Kouros Owzar:** supervision,  
810 writing—review and editing for APOBEC enrichment score, immune gene signatures, and  
811 correlation analysis of TCGA data; **Jichun Xie:** supervision, writing—review and editing for  
812 APOBEC enrichment score, immune gene signatures, and correlation analysis of TCGA data;  
813 **James V. Alvarez:** conceptualization, supervision, funding acquisition, project administration,  
814 writing—review and editing.

## 815 **Acknowledgements**

816           We thank Dr. Lewis Chodosh (University of Pennsylvania) for providing the SMF cell line.  
817   We thank Dr. Michael Plebanek and Dr. Nicolas Devito (Duke University) for technical advice  
818   with flow cytometry and ELISpot. We thank Elizabeth Mendes and Alexandra Bennion (Duke  
819   University) for providing technical assistance, and Dr. Andrea Walens (University of North  
820   Carolina at Chapel Hill) for reviewing the manuscript. We thank the Duke Pathology Research  
821   Immunohistology Lab for paraffin processing and IHC staining of tissue. We thank Dr. Nicolas  
822   Devos (Duke University) and the Duke University School of Medicine Sequencing and Genomic  
823   Technologies Shared Resource for providing library preparation and sequencing for RNA-seq and  
824   WES analyses, and sequencing for TCR-seq analysis. This work was funded by the National  
825   Cancer Institute under award R01CA208042 (to J.V.A.) and T32-CA009111 (to A.V.D.), as well  
826   as the American Cancer Society under award 132556-RSG-18-130-CCG (to J.V.A.) and by startup  
827   funds from the Duke Cancer Institute, the Duke University School of Medicine, the Whitehead  
828   Foundation (to J.V.A.), and the National Institutes of Health under T32-GM007184 (to A.V.D.).

829 **SUPPLEMENTARY MATERIAL**

830 **Supplementary Figures S1-S10**

831 **Supplementary Table S1:** Spreadsheet of gene lists for immune cell gene signatures for analyses  
832 in Figure 6 and Supplementary Figure S9. The genes that were absent from the TCGA-BRCA  
833 RNA-seq dataset are colored in red.

834 **Supplementary Table S2:** Spreadsheet containing TCGA-BRCA patient ID and data used for  
835 analyses in Figure 6 and Supplementary Figure S9. Column descriptions:

836 Sample\_ID – TCGA sample identifier

837 Cluster\_Number – APOBEC-high or -low immune cluster number (e.g. “APOBEC-high HER2-  
838 1” refers to APOBEC-high HER2 subtype Immune Cluster 1)

839 Age\_Median – patient age

840 ER.Status – clinical ER status

841 PR.Status – clinical PR status

842 Her2.Status – clinical HER2 status

843 PAM50 – PAM50 subtype

844 Pathologic\_stage – clinical pathologic stage

845 Histological\_type – clinical histological type

846 n\_C\_mut – number of C>T/G (or G>A) mutations

847 n\_C\_con – number of C (or G) within the 41-nucleotide region centered on the C>T/G (or G>C/A)  
848 mutations

849 n\_TCW\_mut – number of C>T/G (or G>C/A) mutations in TCW (or WGA) motifs

850 n\_TCW\_con – number of TCW (or WGA) motifs within the 41-nucleotide region centered on the  
851 mutated motifs, TCW to TTW/TGW (or WGA to WAA/WCA).



852 APOBEC – APOBEC enrichment score

853 Number\_of\_Subclonal\_Mutations – number of subclonal mutations from Raynaud et al. 2018

854 The remaining columns are principal component analysis (PCA)-collapsed log2 normalized gene

855 expression of immune cell gene signatures from RNA-seq data.

856 **Supplementary Table S3:** Spreadsheet of correlations between APOBEC enrichment score and

857 immune cell signatures used for analyses in Figure 6. Column descriptions:

858 PAM50 – PAM50 subtype

859 rho – Spearman’s rho value from correlation analysis

860 pvalue – p-value from correlation analysis

861 adjusted\_pvalue – adjusted p-value from correlation analysis

## 862 REFERENCES

- 863 1. Nik-Zainal S, Alexandrov LB, Wedge DC, Van Loo P, Greenman CD, Raine K, et al.  
864 Mutational processes molding the genomes of 21 breast cancers. *Cell*. 2012;149:979–93.
- 865 2. Alexandrov LB, Nik-Zainal S, Wedge DC, Aparicio SAJR, Behjati S, Biankin AV, et al.  
866 Signatures of mutational processes in human cancer. *Nature*. 2013;500:415–21.
- 867 3. Alexandrov LB, Kim J, Haradhvala NJ, Huang MN, Tian Ng AW, Wu Y, et al. The  
868 repertoire of mutational signatures in human cancer. *Nature*. 2020;578:94–101.
- 869 4. Roberts SA, Sterling J, Thompson C, Harris S, Mav D, Shah R, et al. Clustered mutations  
870 in yeast and in human cancers can arise from damaged long single-strand DNA regions.  
871 *Mol Cell*. 2012;46:424–35.
- 872 5. Taylor BJ, Nik-Zainal S, Wu YL, Stebbings LA, Raine K, Campbell PJ, et al. DNA  
873 deaminases induce break-associated mutation showers with implication of APOBEC3B  
874 and 3A in breast cancer kataegis. *Elife*. 2013;2:e00534.
- 875 6. Supek F, Lehner B. Clustered Mutation Signatures Reveal that Error-Prone DNA Repair  
876 Targets Mutations to Active Genes. *Cell*. 2017;170:534–547.e23.
- 877 7. Swanton C, McGranahan N, Starrett GJ, Harris RS. APOBEC enzymes: mutagenic fuel for  
878 cancer evolution and heterogeneity. *Cancer Discov*. 2015;5:704–12.
- 879 8. Roberts SA, Gordenin DA. Clustered and genome-wide transient mutagenesis in human  
880 cancers: Hypermutation without permanent mutators or loss of fitness. *Bioessays*.  
881 2014;36:382–93.
- 882 9. Roberts SA, Lawrence MS, Klimczak LJ, Grimm SA, Fargo D, Stojanov P, et al. An  
883 APOBEC cytidine deaminase mutagenesis pattern is widespread in human cancers. *Nat*  
884 *Genet*. 2013;45:970–6.
- 885 10. Burns MB, Temiz NA, Harris RS. Evidence for APOBEC3B mutagenesis in multiple  
886 human cancers. *Nat Genet*. 2013;45:977–83.
- 887 11. Nik-Zainal S, Davies H, Staaf J, Ramakrishna M, Glodzik D, Zou X, et al. Landscape of  
888 somatic mutations in 560 breast cancer whole-genome sequences. *Nature*. 2016;534:47–54.
- 889 12. Kanu N, Cerone MA, Goh G, Zalmas L-P, Bartkova J, Dietzen M, et al. DNA replication  
890 stress mediates APOBEC3 family mutagenesis in breast cancer. *Genome Biol*.  
891 2016;17:185.
- 892 13. van Rooij N, van Buuren MM, Philips D, Velds A, Toebes M, Heemskerk B, et al. Tumor  
893 exome analysis reveals neoantigen-specific T-cell reactivity in an ipilimumab-responsive  
894 melanoma. *J Clin Oncol*. 2013;31:e439-42.
- 895 14. Castle JC, Kreiter S, Diekmann J, Löwer M, van de Roemer N, de Graaf J, et al. Exploiting  
896 the mutanome for tumor vaccination. *Cancer Res*. 2012;72:1081–91.
- 897 15. Le DT, Uram JN, Wang H, Bartlett BR, Kemberling H, Eyring AD, et al. PD-1 Blockade  
898 in Tumors with Mismatch-Repair Deficiency. *N Engl J Med*. 2015;372:2509–20.
- 899 16. Le DT, Durham JN, Smith KN, Wang H, Bartlett BR, Aulakh LK, et al. Mismatch repair  
900 deficiency predicts response of solid tumors to PD-1 blockade. *Science*. 2017;357:409–13.
- 901 17. Rizvi NA, Hellmann MD, Snyder A, Kvistborg P, Makarov V, Havel JJ, et al. Cancer  
902 immunology. Mutational landscape determines sensitivity to PD-1 blockade in non-small  
903 cell lung cancer. *Science*. 2015;348:124–8.
- 904 18. Vonderheide RH, Domchek SM, Clark AS. Immunotherapy for breast cancer: what are we  
905 missing? *Clin Cancer Res*. 2017;23:2640–6.
- 906 19. Emens LA. Breast cancer immunotherapy: facts and hopes. *Clin Cancer Res*. 2018;24:511–  
907 20.

- 908 20. Adams S, Gatti-Mays ME, Kalinsky K, Korde LA, Sharon E, Amiri-Kordestani L, et al.  
909 Current landscape of immunotherapy in breast cancer: A review. *JAMA Oncol.* 2019;  
910 21. Nanda R, Chow LQM, Dees EC, Berger R, Gupta S, Geva R, et al. Pembrolizumab in  
911 Patients With Advanced Triple-Negative Breast Cancer: Phase Ib KEYNOTE-012 Study. *J*  
912 *Clin Oncol.* 2016;34:2460–7.  
913 22. Emens LA, Cruz C, Eder JP, Braiteh F, Chung C, Tolaney SM, et al. Long-term Clinical  
914 Outcomes and Biomarker Analyses of Atezolizumab Therapy for Patients With Metastatic  
915 Triple-Negative Breast Cancer: A Phase 1 Study. *JAMA Oncol.* 2019;5:74–82.  
916 23. Schmid P, Adams S, Rugo HS, Schneeweiss A, Barrios CH, Iwata H, et al. Atezolizumab  
917 and Nab-Paclitaxel in Advanced Triple-Negative Breast Cancer. *N Engl J Med.*  
918 2018;379:2108–21.  
919 24. Dirix LY, Takacs I, Jerusalem G, Nikolinakos P, Arkenau H-T, Forero-Torres A, et al.  
920 Avelumab, an anti-PD-L1 antibody, in patients with locally advanced or metastatic breast  
921 cancer: a phase 1b JAVELIN Solid Tumor study. *Breast Cancer Res Treat.* 2018;167:671–  
922 86.  
923 25. Loi S, Giobbie-Hurder A, Gombos A, Bachelot T, Hui R, Curigliano G, et al.  
924 Pembrolizumab plus trastuzumab in trastuzumab-resistant, advanced, HER2-positive breast  
925 cancer (PANACEA): a single-arm, multicentre, phase 1b-2 trial. *Lancet Oncol.*  
926 2019;20:371–82.  
927 26. Boichard A, Tsigelny IF, Kurzrock R. High expression of PD-1 ligands is associated with  
928 kataegis mutational signature and APOBEC3 alterations. *Oncoimmunology.*  
929 2017;6:e1284719.  
930 27. Boichard A, Pham TV, Yeerna H, Goodman A, Tamayo P, Lippman S, et al. APOBEC-  
931 related mutagenesis and neo-peptide hydrophobicity: implications for response to  
932 immunotherapy. *Oncoimmunology.* 2019;8:1550341.  
933 28. Wang S, Jia M, He Z, Liu X-S. APOBEC3B and APOBEC mutational signature as  
934 potential predictive markers for immunotherapy response in non-small cell lung cancer.  
935 *Oncogene.* 2018;37:3924–36.  
936 29. Miao D, Margolis CA, Vokes NI, Liu D, Taylor-Weiner A, Wankowicz SM, et al.  
937 Genomic correlates of response to immune checkpoint blockade in microsatellite-stable  
938 solid tumors. *Nat Genet.* 2018;50:1271–81.  
939 30. Barroso-Sousa R, Jain E, Cohen O, Kim D, Buendia-Buendia J, Winer E, et al. Prevalence  
940 and mutational determinants of high tumor mutation burden in breast cancer. *Ann Oncol.*  
941 2020;31:387–94.  
942 31. Hollern DP, Xu N, Thennavan A, Glodowski C, Garcia-Recio S, Mott KR, et al. B cells  
943 and T follicular helper cells mediate response to checkpoint inhibitors in high mutation  
944 burden mouse models of breast cancer. *Cell.* 2019;179:1191–1206.e21.  
945 32. Driscoll CB, Schuelke MR, Kottke T, Thompson JM, Wongthida P, Tonne JM, et al.  
946 APOBEC3B-mediated corruption of the tumor cell immunopeptidome induces heteroclitic  
947 neoepitopes for cancer immunotherapy. *Nat Commun.* 2020;11:790.  
948 33. Elson A, Leder P. Protein-tyrosine phosphatase epsilon. An isoform specifically expressed  
949 in mouse mammary tumors initiated by v-Ha-ras OR neu. *J Biol Chem.* 1995;270:26116–  
950 22.  
951 34. Chan K, Roberts SA, Klimczak LJ, Sterling JF, Saini N, Malc EP, et al. An APOBEC3A  
952 hypermutation signature is distinguishable from the signature of background mutagenesis  
953 by APOBEC3B in human cancers. *Nat Genet.* 2015;47:1067–72.

- 954 35. Burns MB, Lackey L, Carpenter MA, Rathore A, Land AM, Leonard B, et al. APOBEC3B  
955 is an enzymatic source of mutation in breast cancer. *Nature*. 2013;494:366–70.
- 956 36. Akre MK, Starrett GJ, Quist JS, Temiz NA, Carpenter MA, Tutt ANJ, et al. Mutation  
957 Processes in 293-Based Clones Overexpressing the DNA Cytosine Deaminase  
958 APOBEC3B. *PLoS One*. 2016;11:e0155391.
- 959 37. Nikkilä J, Kumar R, Campbell J, Brandsma I, Pemberton HN, Wallberg F, et al. Elevated  
960 APOBEC3B expression drives a kataegic-like mutation signature and replication stress-  
961 related therapeutic vulnerabilities in p53-defective cells. *Br J Cancer*. 2017;117:113–23.
- 962 38. MacMillan AL, Kohli RM, Ross SR. APOBEC3 inhibition of mouse mammary tumor  
963 virus infection: the role of cytidine deamination versus inhibition of reverse transcription. *J*  
964 *Virology*. 2013;87:4808–17.
- 965 39. Landry S, Narvaiza I, Linfesty DC, Weitzman MD. APOBEC3A can activate the DNA  
966 damage response and cause cell-cycle arrest. *EMBO Rep*. 2011;12:444–50.
- 967 40. Petljak M, Alexandrov LB, Brammied JS, Price S, Wedge DC, Grossmann S, et al.  
968 Characterizing mutational signatures in human cancer cell lines reveals episodic APOBEC  
969 mutagenesis. *Cell*. 2019;176:1282–1294.e20.
- 970 41. Huang X, Wojtowicz D, Przytycka TM. Detecting presence of mutational signatures in  
971 cancer with confidence. *Bioinformatics*. 2018;34:330–7.
- 972 42. Li S, Crawford FW, Gerstein MB. Using sigLASSO to optimize cancer mutation  
973 signatures jointly with sampling likelihood. *Nat Commun*. 2020;11:3575.
- 974 43. Binnewies M, Roberts EW, Kersten K, Chan V, Fearon DF, Merad M, et al. Understanding  
975 the tumor immune microenvironment (TIME) for effective therapy. *Nat Med*.  
976 2018;24:541–50.
- 977 44. Ademmer K, Ebert M, Müller-Ostermeyer F, Friess H, Büchler MW, Schubert W, et al.  
978 Effector T lymphocyte subsets in human pancreatic cancer: detection of CD8+CD18+ cells  
979 and CD8+CD103+ cells by multi-epitope imaging. *Clin Exp Immunol*. 1998;112:21–6.
- 980 45. Herbst RS, Soria J-C, Kowanetz M, Fine GD, Hamid O, Gordon MS, et al. Predictive  
981 correlates of response to the anti-PD-L1 antibody MPDL3280A in cancer patients. *Nature*.  
982 2014;515:563–7.
- 983 46. Beatty GL, Winograd R, Evans RA, Long KB, Luque SL, Lee JW, et al. Exclusion of T  
984 cells from pancreatic carcinomas in mice is regulated by ly6c(low) F4/80(+) extratumoral  
985 macrophages. *Gastroenterology*. 2015;149:201–10.
- 986 47. Mlecnik B, Bindea G, Angell HK, Maby P, Angelova M, Tougeron D, et al. Integrative  
987 analyses of colorectal cancer show immunoscore is a stronger predictor of patient survival  
988 than microsatellite instability. *Immunity*. 2016;44:698–711.
- 989 48. Hosoi A, Takeda K, Nagaoka K, Iino T, Matsushita H, Ueha S, et al. Increased diversity  
990 with reduced “diversity evenness” of tumor infiltrating T-cells for the successful cancer  
991 immunotherapy. *Sci Rep*. 2018;8:1058.
- 992 49. Nik-Zainal S, Van Loo P, Wedge DC, Alexandrov LB, Greenman CD, Lau KW, et al. The  
993 life history of 21 breast cancers. *Cell*. 2012;149:994–1007.
- 994 50. Jamal-Hanjani M, Wilson GA, McGranahan N, Birkbak NJ, Watkins TBK, Veeriah S, et  
995 al. Tracking the Evolution of Non-Small-Cell Lung Cancer. *N Engl J Med*.  
996 2017;376:2109–21.
- 997 51. McGranahan N, Favero F, de Bruin EC, Birkbak NJ, Szallasi Z, Swanton C. Clonal status  
998 of actionable driver events and the timing of mutational processes in cancer evolution. *Sci*  
999 *Transl Med*. 2015;7:283ra54.

- 1000 52. Jia Q, Wu W, Wang Y, Alexander PB, Sun C, Gong Z, et al. Local mutational diversity  
1001 drives intratumoral immune heterogeneity in non-small cell lung cancer. *Nat Commun.*  
1002 2018;9:5361.
- 1003 53. Rosenthal R, Cadieux EL, Salgado R, Bakir MA, Moore DA, Hiley CT, et al. Neoantigen-  
1004 directed immune escape in lung cancer evolution. *Nature.* 2019;567:479–85.
- 1005 54. Wolf Y, Bartok O, Patkar S, Eli GB, Cohen S, Litchfield K, et al. UVB-Induced Tumor  
1006 Heterogeneity Diminishes Immune Response in Melanoma. *Cell.* 2019;179:219–235.e21.
- 1007 55. McGranahan N, Furness AJS, Rosenthal R, Ramskov S, Lyngaa R, Saini SK, et al. Clonal  
1008 neoantigens elicit T cell immunoreactivity and sensitivity to immune checkpoint blockade.  
1009 *Science.* 2016;351:1463–9.
- 1010 56. Bindea G, Mlecnik B, Tosolini M, Kirilovsky A, Waldner M, Obenauf AC, et al.  
1011 Spatiotemporal dynamics of intratumoral immune cells reveal the immune landscape in  
1012 human cancer. *Immunity.* 2013;39:782–95.
- 1013 57. Faruki H, Mayhew GM, Serody JS, Hayes DN, Perou CM, Lai-Goldman M. Lung  
1014 adenocarcinoma and squamous cell carcinoma gene expression subtypes demonstrate  
1015 significant differences in tumor immune landscape. *J Thorac Oncol.* 2017;12:943–53.
- 1016 58. Savas P, Salgado R, Denkert C, Sotiriou C, Darcy PK, Smyth MJ, et al. Clinical relevance  
1017 of host immunity in breast cancer: from TILs to the clinic. *Nat Rev Clin Oncol.*  
1018 2016;13:228–41.
- 1019 59. Cimino-Mathews A, Thompson E, Taube JM, Ye X, Lu Y, Meeker A, et al. PD-L1 (B7-  
1020 H1) expression and the immune tumor microenvironment in primary and metastatic breast  
1021 carcinomas. *Hum Pathol.* 2016;47:52–63.
- 1022 60. Glaser AP, Fantini D, Wang Y, Yu Y, Rimar KJ, Podojil JR, et al. APOBEC-mediated  
1023 mutagenesis in urothelial carcinoma is associated with improved survival, mutations in  
1024 DNA damage response genes, and immune response. *Oncotarget.* 2018;9:4537–48.
- 1025 61. Raynaud F, Mina M, Tavernari D, Ciriello G. Pan-cancer inference of intra-tumor  
1026 heterogeneity reveals associations with different forms of genomic instability. *PLoS Genet.*  
1027 2018;14:e1007669.
- 1028 62. Ellsworth RE, Ellsworth DL, Patney HL, Deyarmin B, Love B, Hooke JA, et al.  
1029 Amplification of HER2 is a marker for global genomic instability. *BMC Cancer.*  
1030 2008;8:297.
- 1031 63. Takahashi H, Asaoka M, Yan L, Rashid OM, Oshi M, Ishikawa T, et al. Biologically  
1032 Aggressive Phenotype and Anti-cancer Immunity Counterbalance in Breast Cancer with  
1033 High Mutation Rate. *Sci Rep.* 2020;10:1852.
- 1034 64. Smid M, Rodríguez-González FG, Sieuwerts AM, Salgado R, Prager-Van der Smissen  
1035 WJC, Vlugt-Daane M van der, et al. Breast cancer genome and transcriptome integration  
1036 implicates specific mutational signatures with immune cell infiltration. *Nat Commun.*  
1037 2016;7:12910.
- 1038 65. Faden DL, Ding F, Lin Y, Zhai S, Kuo F, Chan TA, et al. APOBEC mutagenesis is tightly  
1039 linked to the immune landscape and immunotherapy biomarkers in head and neck  
1040 squamous cell carcinoma. *Oral Oncol.* 2019;96:140–7.
- 1041 66. McDonald K-A, Kawaguchi T, Qi Q, Peng X, Asaoka M, Young J, et al. Tumor  
1042 Heterogeneity Correlates with Less Immune Response and Worse Survival in Breast  
1043 Cancer Patients. *Ann Surg Oncol.* 2019;26:2191–9.
- 1044 67. Chen Z, Wen W, Bao J, Kuhs KL, Cai Q, Long J, et al. Integrative genomic analyses of  
1045 APOBEC-mutational signature, expression and germline deletion of APOBEC3 genes, and



- 1046 immunogenicity in multiple cancer types. *BMC Med Genomics*. 2019;12:131.
- 1047 68. Adolph MB, Love RP, Feng Y, Chelico L. Enzyme cycling contributes to efficient  
1048 induction of genome mutagenesis by the cytidine deaminase APOBEC3B. *Nucleic Acids*  
1049 *Res*. 2017;45:11925–40.
- 1050 69. Chédin F. Nascent Connections: R-Loops and Chromatin Patterning. *Trends Genet*.  
1051 2016;32:828–38.
- 1052 70. Mabe NW, Fox DB, Lupo R, Decker AE, Phelps SN, Thompson JW, et al. Epigenetic  
1053 silencing of tumor suppressor Par-4 promotes chemoresistance in recurrent breast cancer. *J*  
1054 *Clin Invest*. 2018;128:4413–28.
- 1055 71. Dobin A, Davis CA, Schlesinger F, Drenkow J, Zaleski C, Jha S, et al. STAR: ultrafast  
1056 universal RNA-seq aligner. *Bioinformatics*. 2013;29:15–21.
- 1057 72. Liao Y, Smyth GK, Shi W. featureCounts: an efficient general purpose program for  
1058 assigning sequence reads to genomic features. *Bioinformatics*. 2014;30:923–30.
- 1059 73. Love MI, Huber W, Anders S. Moderated estimation of fold change and dispersion for  
1060 RNA-seq data with DESeq2. *Genome Biol*. 2014;15:550–550.
- 1061 74. Ashburner M, Ball CA, Blake JA, Botstein D, Butler H, Cherry JM, et al. Gene Ontology:  
1062 tool for the unification of biology. *Nat Genet*. 2000;25:25–9.
- 1063 75. The Gene Ontology Consortium. The Gene Ontology Resource: 20 years and still GOing  
1064 strong. *Nucleic Acids Res*. 2019;47:D330–8.
- 1065 76. Subramanian A, Tamayo P, Mootha VK, Mukherjee S, Ebert BL, Gillette MA, et al. Gene  
1066 set enrichment analysis: a knowledge-based approach for interpreting genome-wide  
1067 expression profiles. *Proc Natl Acad Sci USA*. 2005;102:15545–50.
- 1068 77. Mootha VK, Lindgren CM, Eriksson K-F, Subramanian A, Sihag S, Lehar J, et al. PGC-  
1069  $\alpha$ -responsive genes involved in oxidative phosphorylation are coordinately  
1070 downregulated in human diabetes. *Nat Genet*. 2003;34:267–73.
- 1071 78. Newman AM, Steen CB, Liu CL, Gentles AJ, Chaudhuri AA, Scherer F, et al. Determining  
1072 cell type abundance and expression from bulk tissues with digital cytometry. *Nat*  
1073 *Biotechnol*. 2019;37:773–82.
- 1074 79. Bolotin DA, Poslavsky S, Mitrophanov I, Shugay M, Mamedov IZ, Putintseva EV, et al.  
1075 MiXCR: software for comprehensive adaptive immunity profiling. *Nat Methods*.  
1076 2015;12:380–1.
- 1077 80. Grossman RL, Heath AP, Ferretti V, Varmus HE, Lowy DR, Kibbe WA, et al. Toward a  
1078 shared vision for cancer genomic data. *N Engl J Med*. 2016;375:1109–12.
- 1079 81. Colaprico A, Silva TC, Olsen C, Garofano L, Cava C, Garolini D, et al. TCGAbiolinks: an  
1080 R/Bioconductor package for integrative analysis of TCGA data. *Nucleic Acids Res*.  
1081 2016;44:e71.
- 1082 82. Anders S, Huber W. Differential expression analysis for sequence count data. *Genome*  
1083 *Biol*. 2010;11:R106.
- 1084 83. Law CW, Chen Y, Shi W, Smyth GK. voom: Precision weights unlock linear model  
1085 analysis tools for RNA-seq read counts. *Genome Biol*. 2014;15:R29.
- 1086 84. Robinson MD, McCarthy DJ, Smyth GK. edgeR: a Bioconductor package for differential  
1087 expression analysis of digital gene expression data. *Bioinformatics*. 2010;26:139–40.
- 1088 85. Ritchie ME, Phipson B, Wu D, Hu Y, Law CW, Shi W, et al. limma powers differential  
1089 expression analyses for RNA-sequencing and microarray studies. *Nucleic Acids Res*.  
1090 2015;43:e47.
- 1091 86. Benjamin DI, Sato T, Lichtenstein L, Stewart C, Getz G, Cibulskis K. Calling Somatic

1092 SNVs and Indels with Mutect2. *BioRxiv*. 2019;  
1093 87. Dabney AR. Classification of microarrays to nearest centroids. *Bioinformatics*.  
1094 2005;21:4148–54.  
1095

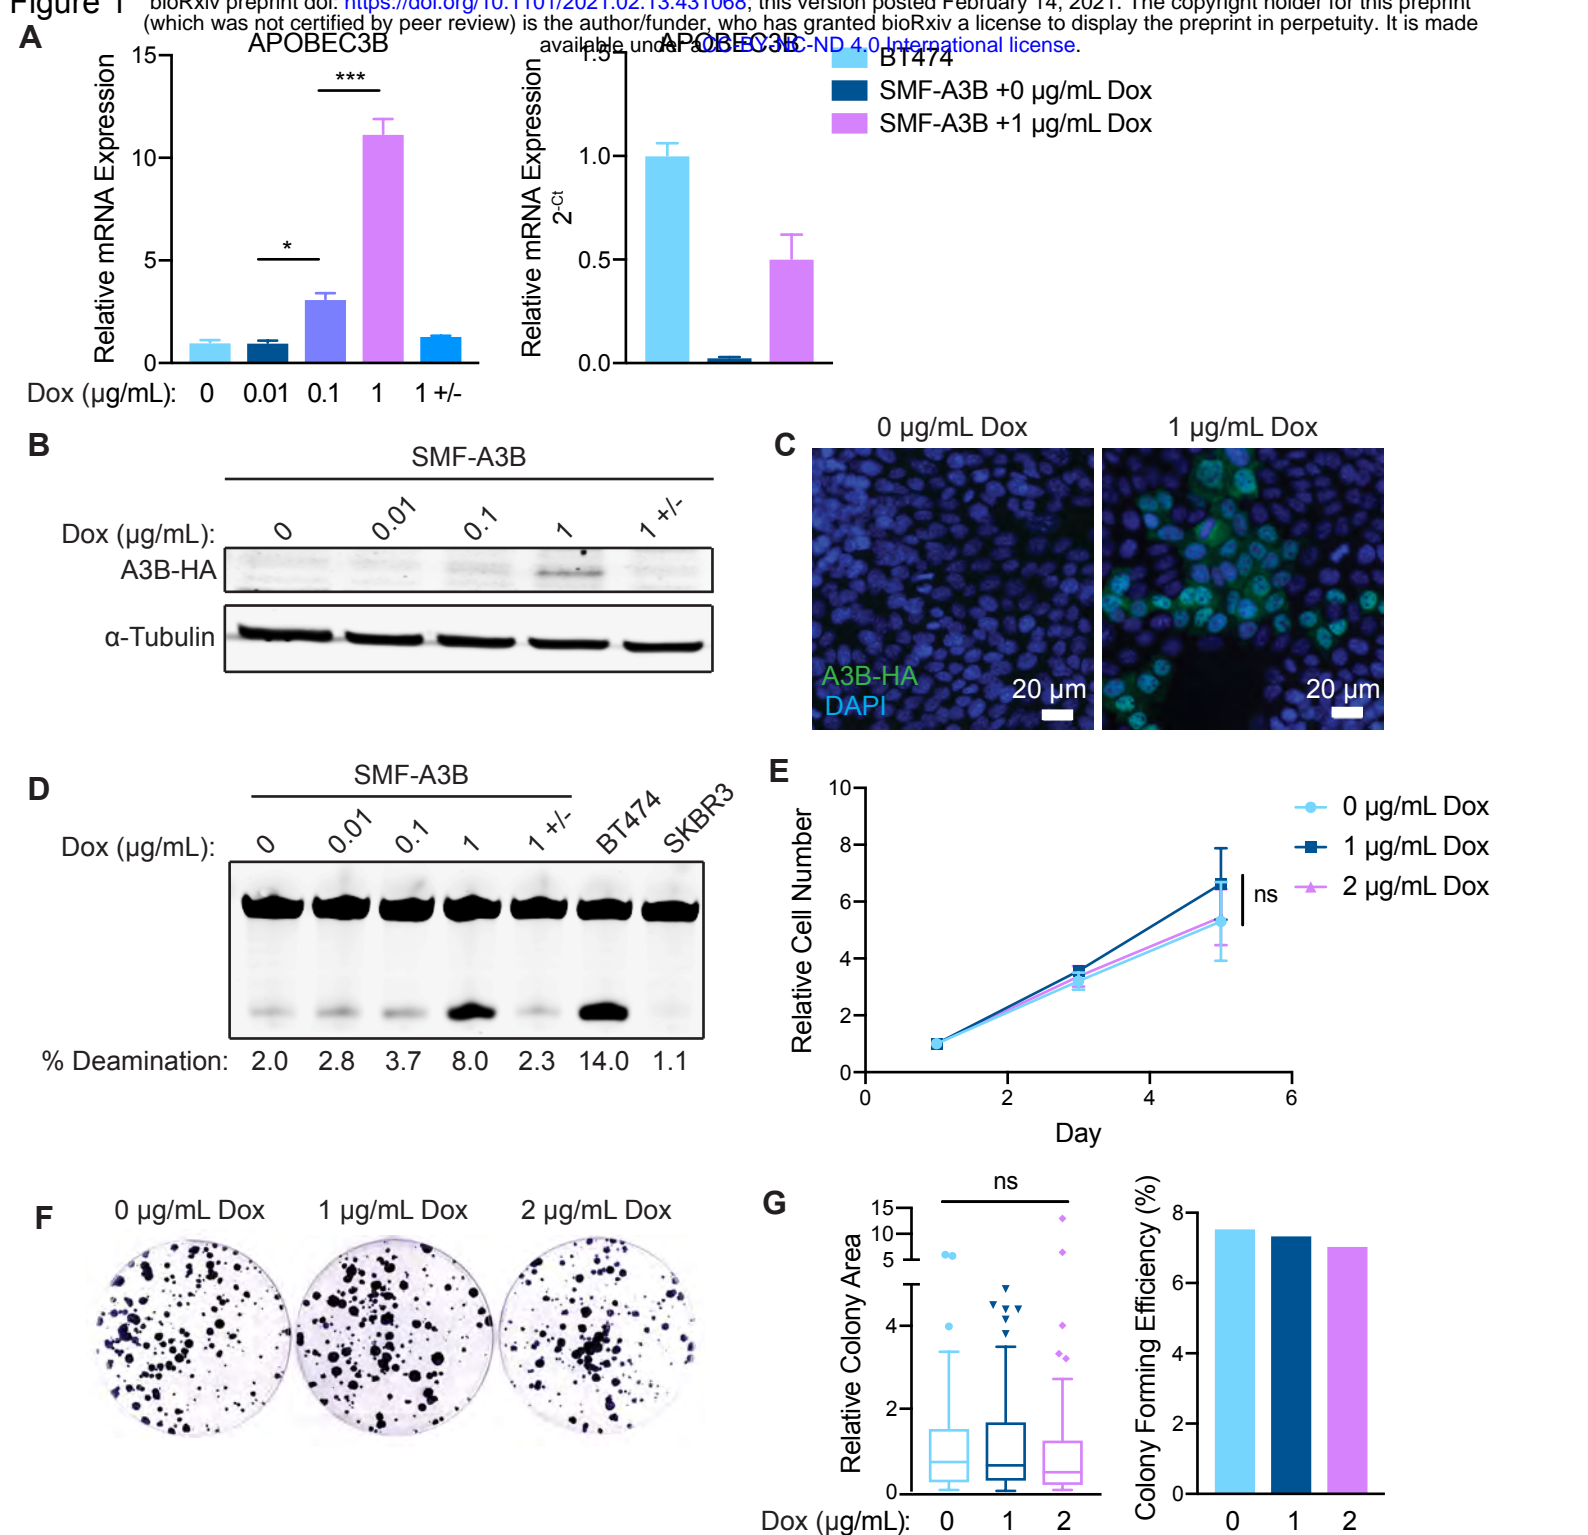

**Figure 1: SMF-A3B cells express titratable and reversible APOBEC3B without loss in cell viability.** (A) qRT-PCR of A3B gene expression in SMF-A3B cells treated with the indicated concentrations of dox for 2 days. 1 +/- indicates treatment with 1  $\mu\text{g/mL}$  of dox for 2 days, then removal of dox for 2 days. Left: A3B expression relative to 0  $\mu\text{g/mL}$  dox condition. Right: A3B expression relative to BT474 cells. Data are representative of 2 independent experiments. Results show 3 biological replicates and error bars depict mean  $\pm$  SEM. Significance was determined using a one-way ANOVA and Tukey's multiple comparisons test. (B) Western blot of HA-tagged A3B in SMF-A3B cells treated with dox as in (A). (C) Immunofluorescence staining for the HA epitope in SMF-A3B cells treated with dox as in (A), showing nuclear localization of HA-A3B. Blue channel is DAPI and green channel is HA. (D) In vitro cytidine deaminase activity assay of SMF-A3B cells treated with dox as in (A). The APOBEC-high human cell line BT474 and the A3B-null human cell line SKBR3 are shown as controls. (E) CellTiter-Glo assay showing growth curves of SMF-A3B cells treated with the indicated concentration of dox. Results are shown as mean  $\pm$  SD of 3 replicates. Statistical significance was determined by two-way ANOVA. (F) Clonogenic assay of SMF-A3B cells cultured with dox for 2 weeks to measure long term survival. Colonies were stained with crystal violet. (G) Quantification of clonogenic assay in (F). Left: Boxplots depicting the relative colony area. Statistical significance was determined using a one-way ANOVA. Right: Colony forming efficiency in each condition. ns  $p > 0.05$ , \*  $p < 0.05$ , \*\*  $p < 0.01$ , \*\*\*  $p < 0.001$



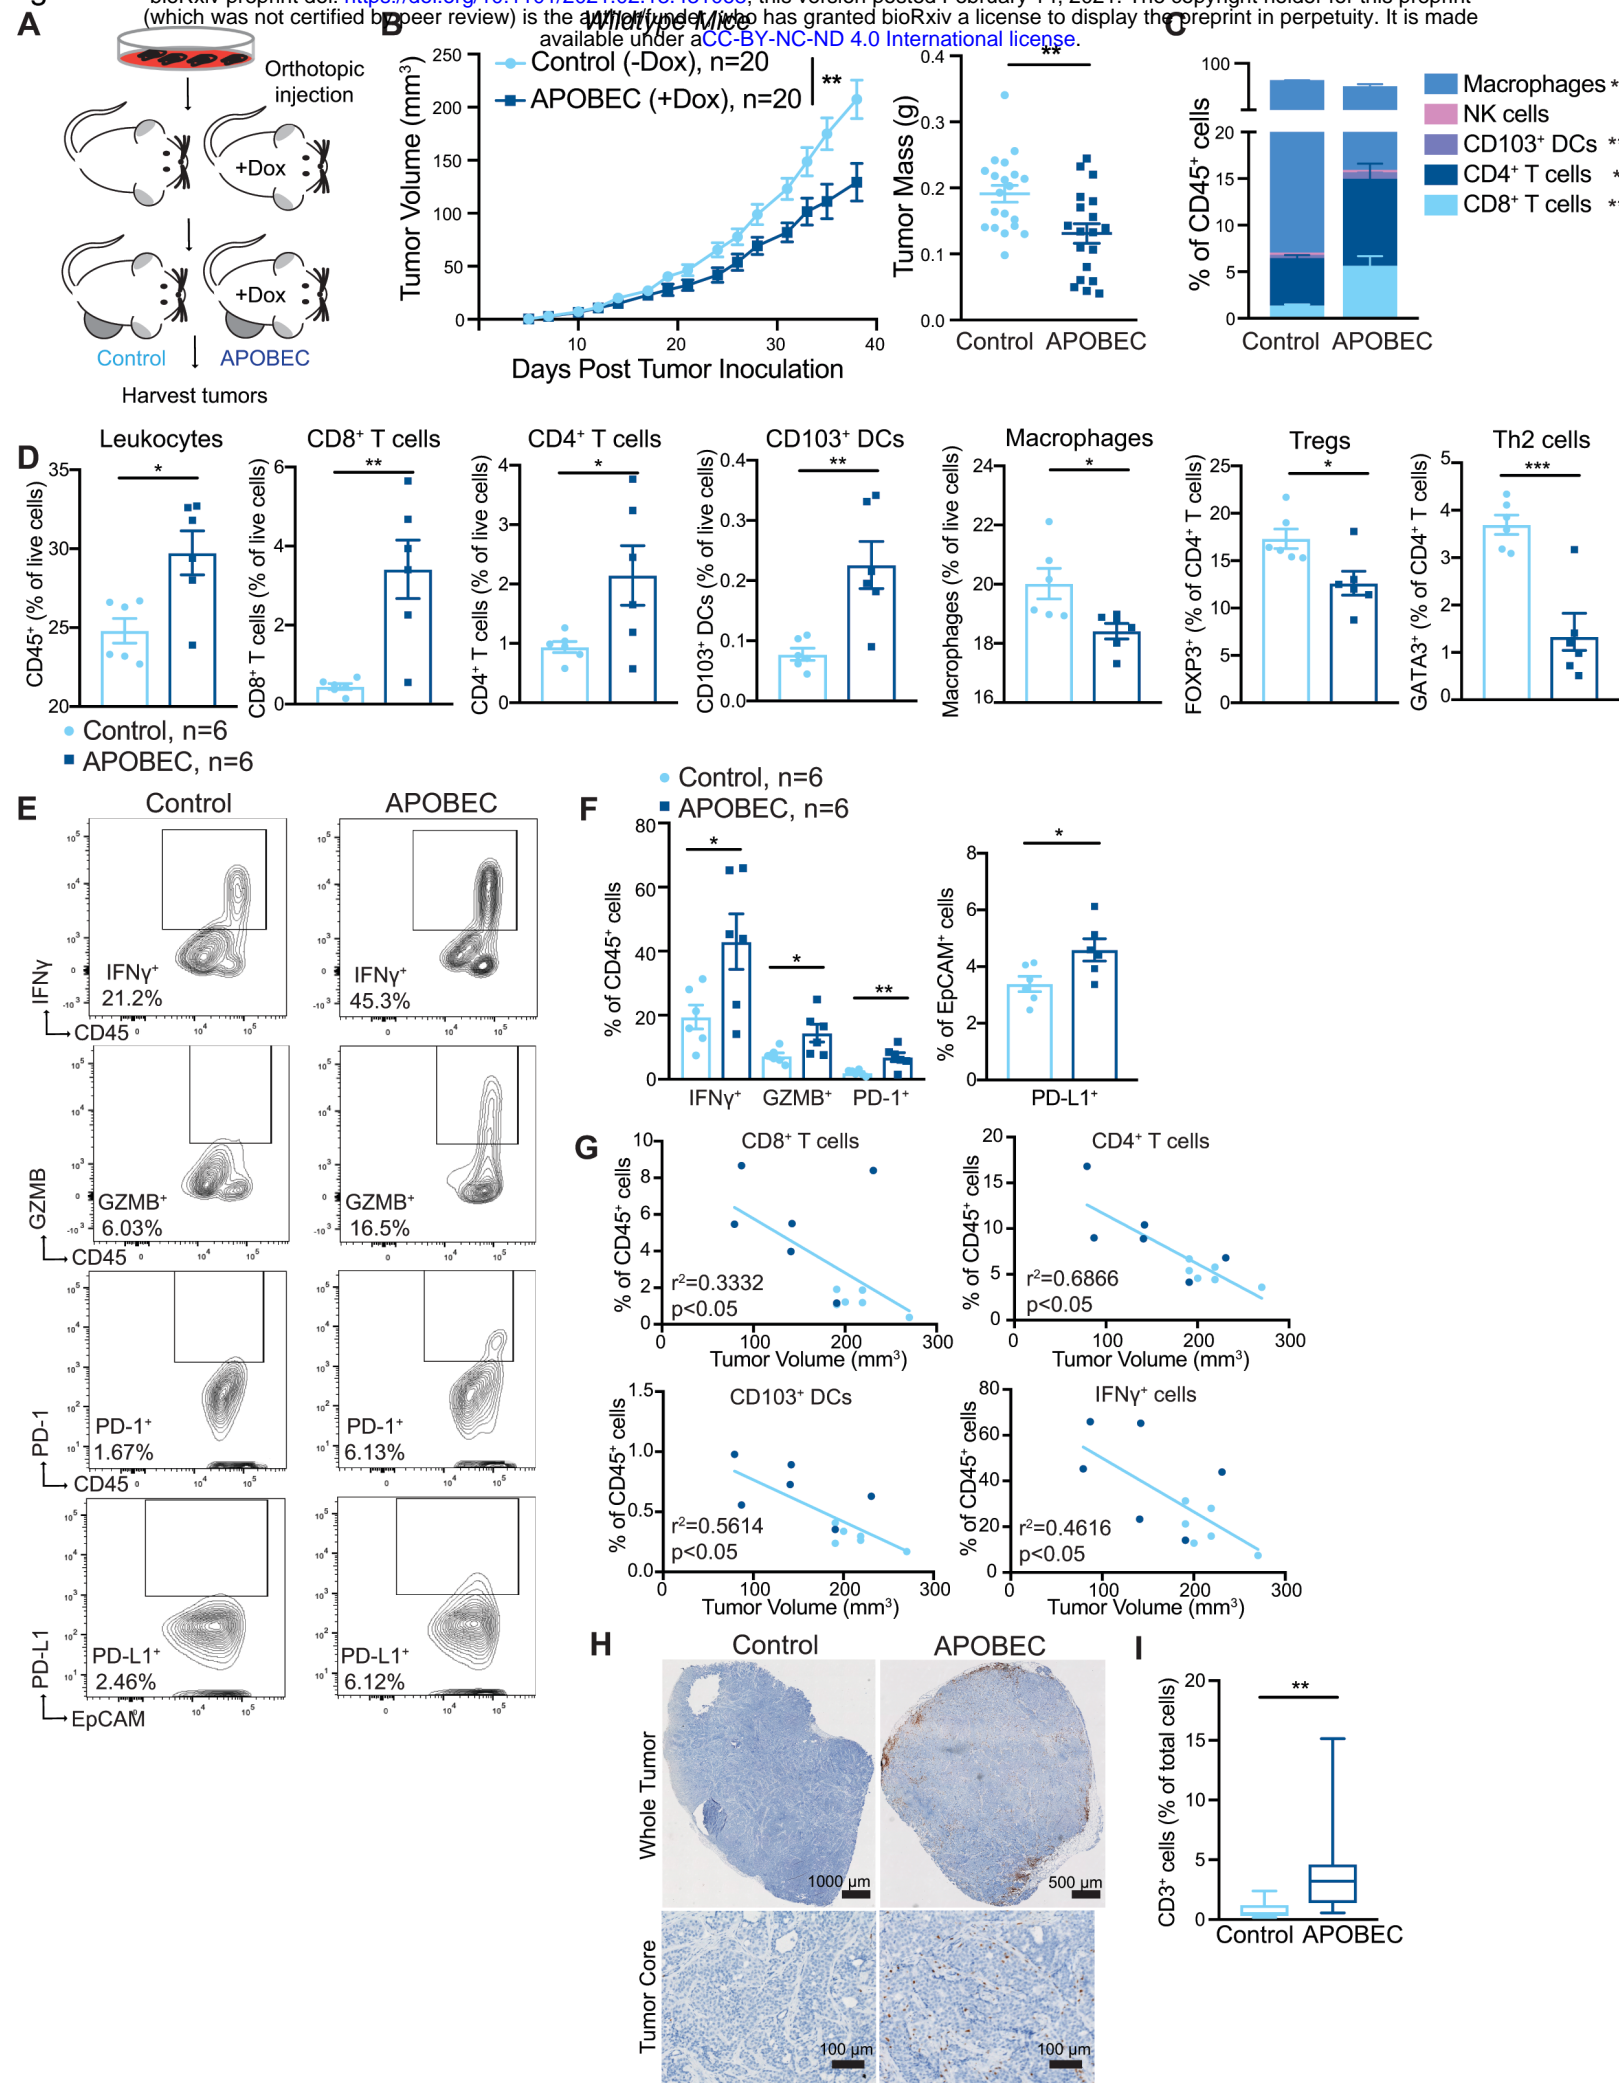

**Figure 2. A3B expression slows tumor growth and triggers the infiltration of antitumor immune cells into the tumor core.** (A) Schematic showing experimental design for tumor growth experiment. SMF-A3B cells were orthotopically implanted in the mammary gland of mice. The APOBEC cohort was administered dox in the drinking water and control cohort was administered normal drinking water until endpoint. (B) Left: tumor volume of control (n=20) and APOBEC tumors (n=20) in wildtype mice. Statistical significance was determined by two-way repeated-measures ANOVA. Right: tumor mass (g) of control and APOBEC tumors at endpoint. Statistical significance was determined by unpaired Student's t-test. Error bars denote mean  $\pm$  SEM. Data is representative of 2 independent experiments. (C) The frequency of immune cell types, expressed as a percentage of total CD45+ cells, in control (n=6) and APOBEC (n=6) tumors as determined by flow cytometry. (D) Flow cytometry quantification of immune cells in control (n=6) and APOBEC (n=6) tumors. Leukocytes, CD8+ T cells, CD4+ T cells, CD103+ dendritic cells (DCs), and macrophages are represented as the percentage of total live cells. T regulatory cells (Tregs) and type-2 T helper (Th2) cells are represented as the percentage of total CD4+ T cells. Statistical significance was determined by unpaired Student's t-test. Error bars denote mean  $\pm$  SEM. (E-F) Representative flow cytometry plots (E) and quantification (F) of staining for IFN  $\gamma$ , Granzyme B, PD-1 and PD-L1 in control (n=6) and APOBEC (n=6) tumors. Statistical significance was determined by unpaired Student's t-test. Error bars denote mean  $\pm$  SEM. (G) Pearson correlation between immune cell frequency and mean tumor volume (mm<sup>3</sup>) in control (light blue) and APOBEC (dark blue) tumors. Only significant correlations are shown, and the r squared values are indicated. (H) Immunohistochemistry (IHC) staining for the T cell marker CD3 in control and APOBEC tumors. The top image is a tiled scan of the whole tumor, and the bottom image is a representative region in the tumor core. (I) Quantification of CD3 staining for control (n=4) and APOBEC (n=4) tumors. Four fields of view were imaged for each tumor. Boxplots show the median percentage of CD3+ cells with minimum and maximum whiskers. Statistical significance was determined by unpaired Student's t test with Welch's correction. \* p < 0.05, \*\* p < 0.01, \*\*\* p < 0.001

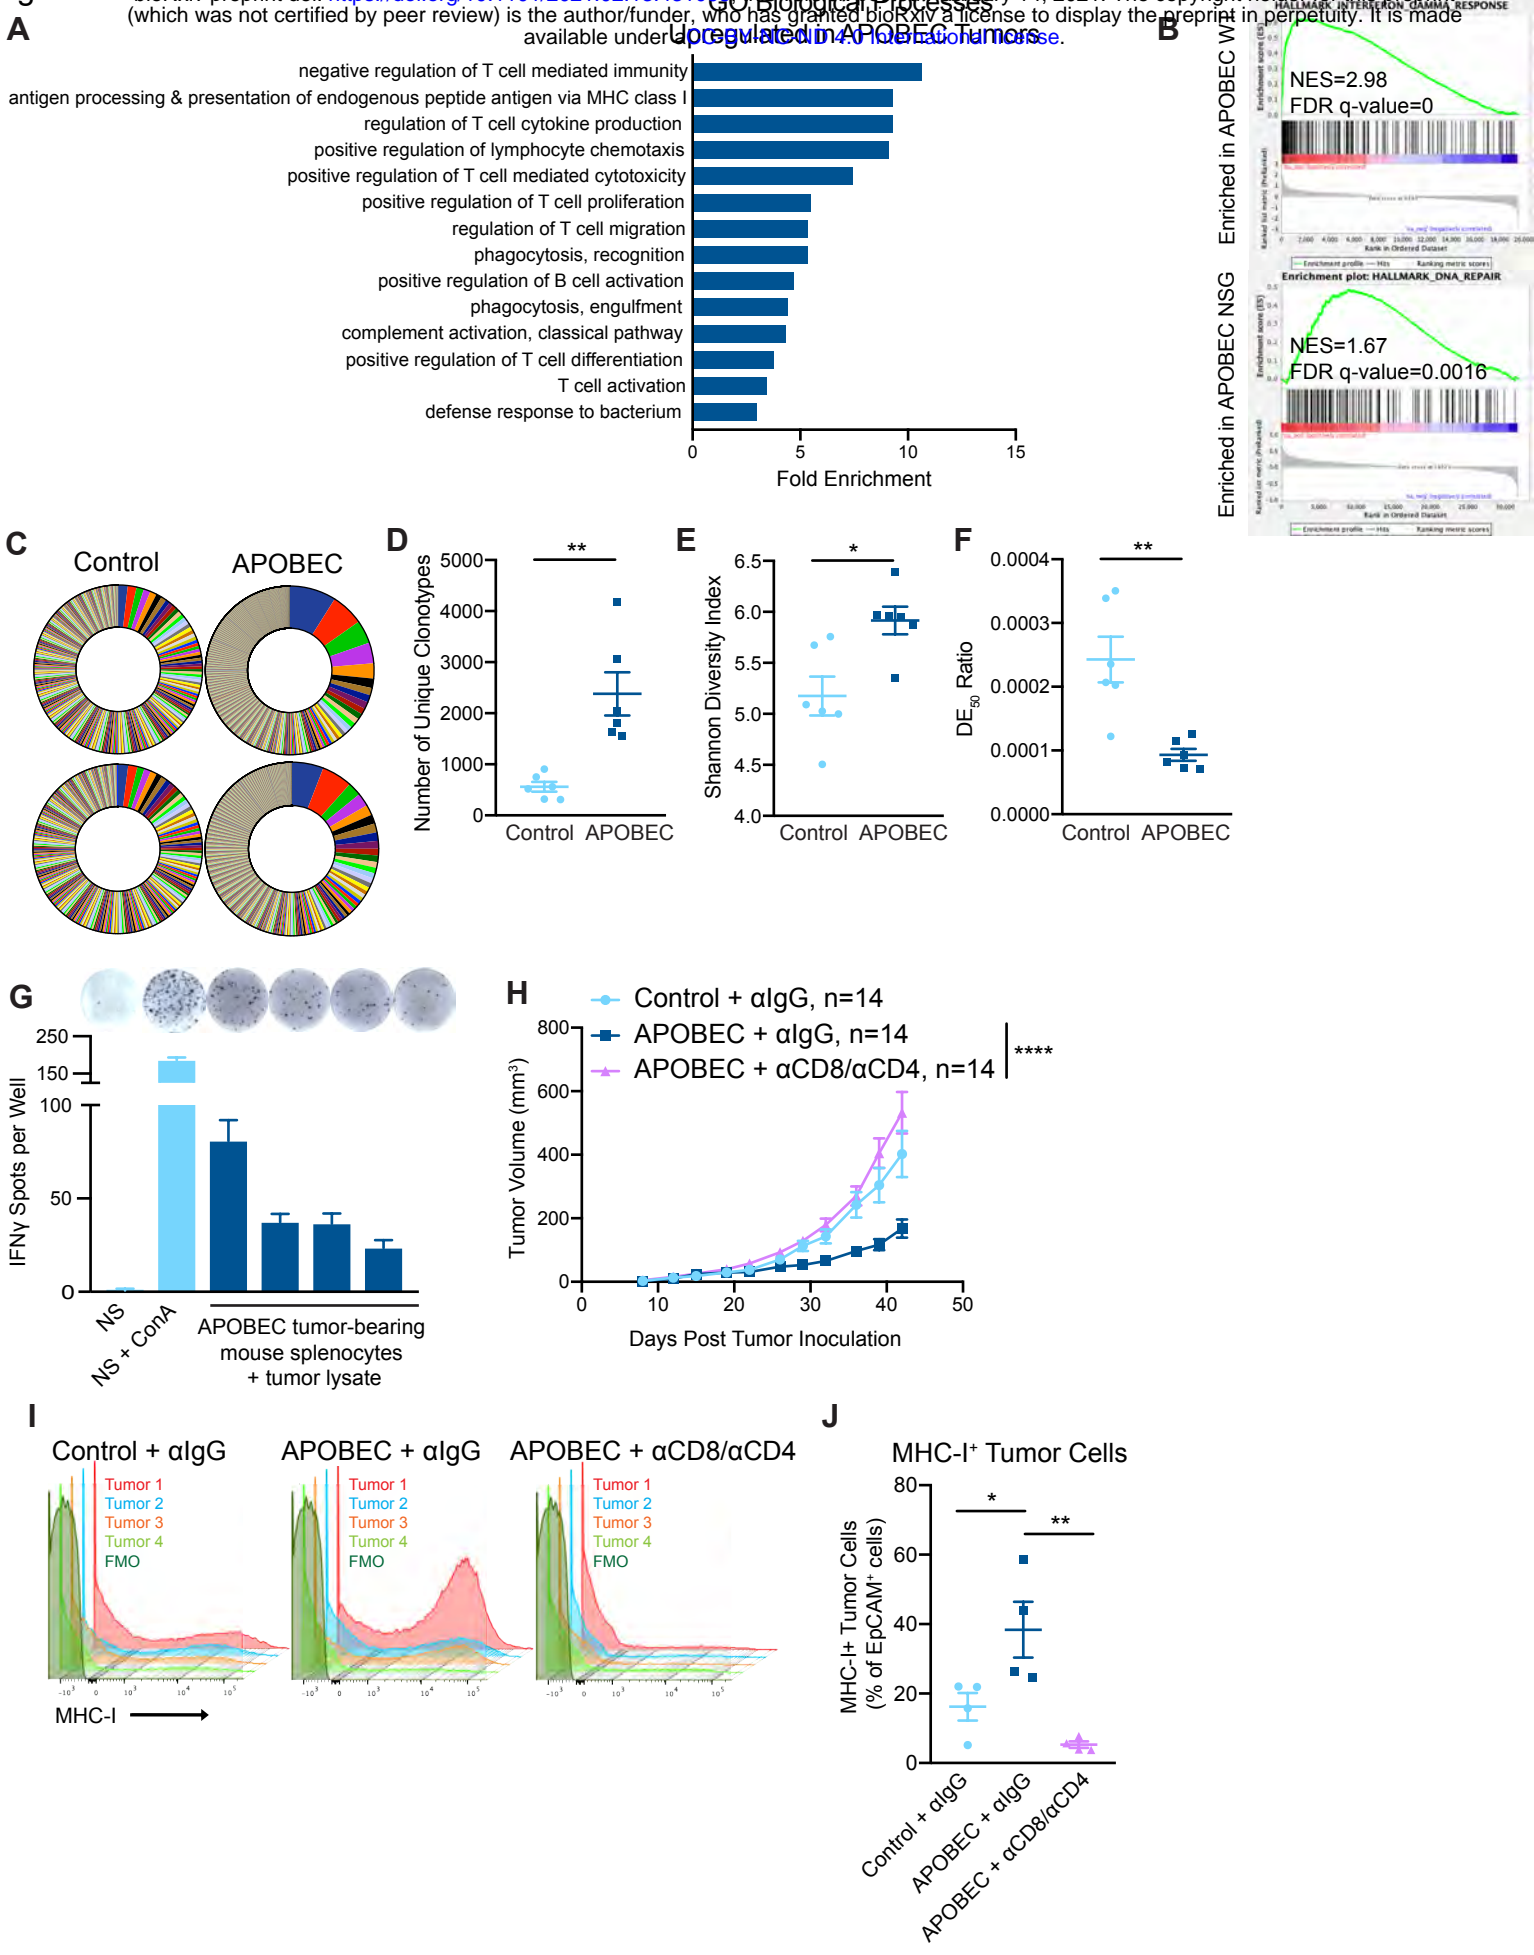

**Figure 3: T cell-dependent antitumor responses in APOBEC tumors.** (A) Gene ontology (GO) analysis of differentially expressed genes between control and APOBEC tumors in immunocompetent mice. Bar graph shows the fold enrichment of select GO biological processes that were significantly enriched in APOBEC tumors (n=6) compared to control tumors (n=6) (FDR<0.05, Fisher's test). All significantly upregulated biological process GO terms are shown in Supplementary Fig. S6A. (B) Gene set enrichment analysis (GSEA) of differentially expressed genes between control and APOBEC tumors. Representative gene sets enriched in APOBEC tumors in immunocompetent mice (top) or immunodeficient mice (bottom) are shown. Normalized Enrichment Scores (NES) and FDR q-values are shown. All significantly enriched gene sets are shown in Supplementary Fig. S6B, C. (C) T cell receptor (TCR) sequencing from control (n=6) and APOBEC tumors (n=6) from wildtype mice. Pie charts show unique TCR clonotypes ranked by abundance in two control and two APOBEC tumors. (D) Quantification of the total number of unique clonotypes in control and APOBEC tumors (n=6 per cohort). (E) The Shannon diversity index of the TCR repertoire in control and APOBEC tumors. (F) TCR diversity evenness 50 (DE50) ratios in control and APOBEC tumors. DE50 ratio is calculated by the number of clonotypes composing the top 50% of total read counts divided by the total number of read counts. Error bars in (C-E) denote mean  $\pm$  SEM. Statistical significance was determined by unpaired Student's t test in (D) and unpaired Student's t test with Welch's correction in (C) and (E). (G) Representative ELISpot images and quantification of the number of IFN $\gamma$  spots per well for each condition. NS, naïve splenocytes from a non-tumor-bearing mouse. ConA, concanavalin A model antigen. Error bars denote mean  $\pm$  SD from 4 technical replicates per condition. (H) Tumor volume (mm<sup>3</sup>) over time for control tumors treated with isotype control antibody (n=14) and APOBEC tumors treated with isotype control (n=14) or  $\alpha$ CD8 and  $\alpha$ CD4 depletion antibodies (n=14) in wildtype mice. Error bars denote mean  $\pm$  SEM. Statistical significance was determined by two-way repeated-measures ANOVA and Tukey's multiple comparisons test. (I) Flow cytometry histograms showing MHC-I expression on EpCAM<sup>+</sup> tumor cells from tumors in (H). (J) Quantification of MHC-I<sup>+</sup> cells, expressed as a percentage of EpCAM<sup>+</sup> cells, in tumors (n=4 per cohort) from (H). Error bars denote mean  $\pm$  SEM. Statistical significance was determined by one-way ANOVA and Tukey's multiple comparisons test. \* p < 0.05, \*\* p < 0.01, \*\*\*\* p < 0.0001

**A**

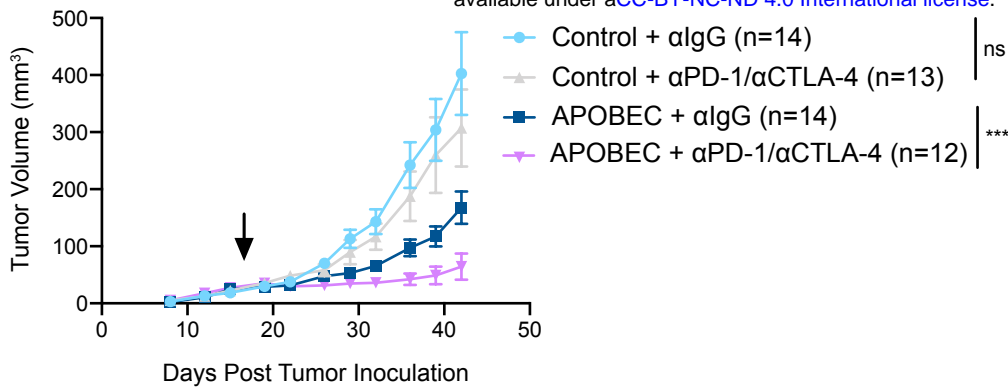

**B**

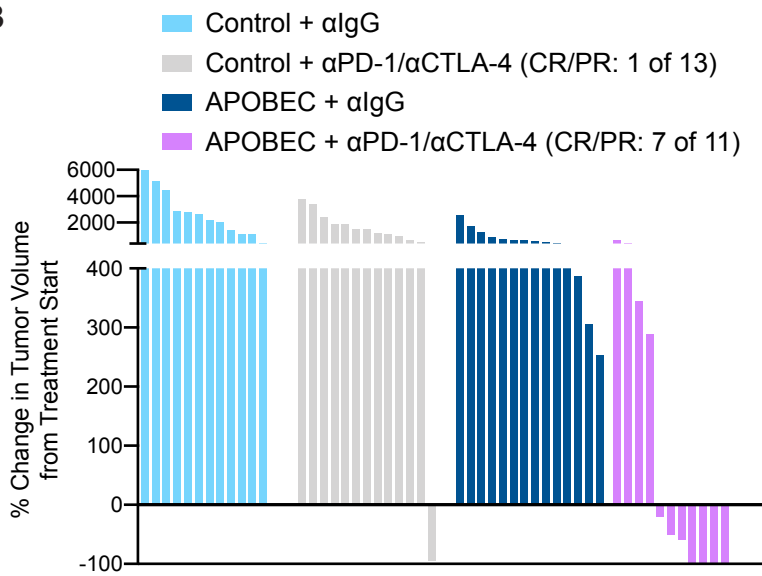

**Figure 4: APOBEC tumors are sensitive to combination anti-PD-1/anti-CTLA4 immune checkpoint blockade.** (A) Tumor volume (mm<sup>3</sup>) over time for control and APOBEC tumors treated with isotype control or αPD-1/αCTLA-4 antibodies. Arrow indicates the treatment start. Error bars denote mean ± SEM. Statistical significance was determined by two-way repeated-measures ANOVA and Tukey's multiple comparisons test. (B) Change in tumor volume from treatment start for palpable tumors until endpoint. Each bar denotes an individual tumor. CR, complete response; PR, partial response. ns p > 0.05, \*\*\* p < 0.001

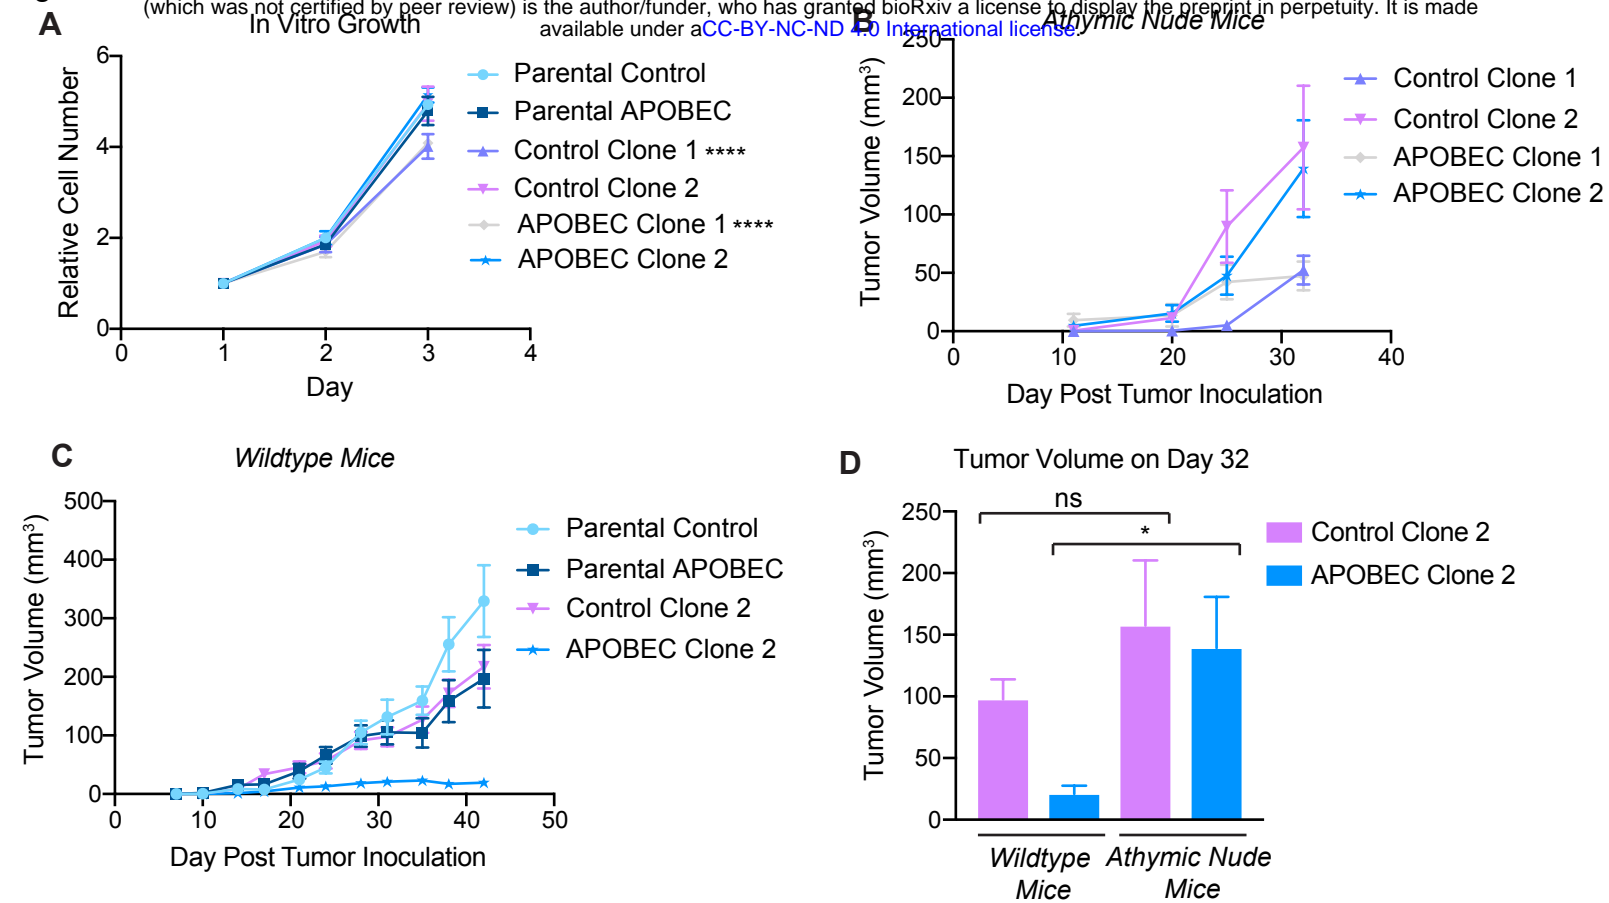

**Figure 5: Complete immune-mediated suppression of clonal APOBEC tumor growth. (A)** In vitro growth curves of single-cell clones derived from control SMF-A3B cells (control) or SMF-A3B cells treated with dox for 2 weeks (APOBEC). The growth curves of the polyclonal parental cells (parental control or parental APOBEC) are shown as a control. Error bars denote mean  $\pm$  SD of 4 replicates. Control Clone 1 and APOBEC Clone 1 proliferate more slowly than the parental control cells, as determined by two-way ANOVA and Dunnett's multiple comparison test. **(B)** Tumor volume (mm<sup>3</sup>) over time for control and APOBEC clones injected in the mammary gland of athymic nude mice. Error bars denote mean  $\pm$  SEM. **(C)** Tumor volume (mm<sup>3</sup>) over time for control and APOBEC clones, as well as the corresponding polyclonal parental populations, injected in the mammary gland of immunocompetent wildtype mice. Error bars denote mean  $\pm$  SEM. **(D)** Comparison of tumor volume on day 32 between clones grown in immunocompromised nude mice from (B) and immunocompetent wildtype mice from (C). Error bars denote mean  $\pm$  SEM and statistical significance was determined by one-way ANOVA and Sidak's multiple comparisons test. ns  $p > 0.05$ , \*  $p < 0.05$ , \*\*\*\*  $p < 0.0001$



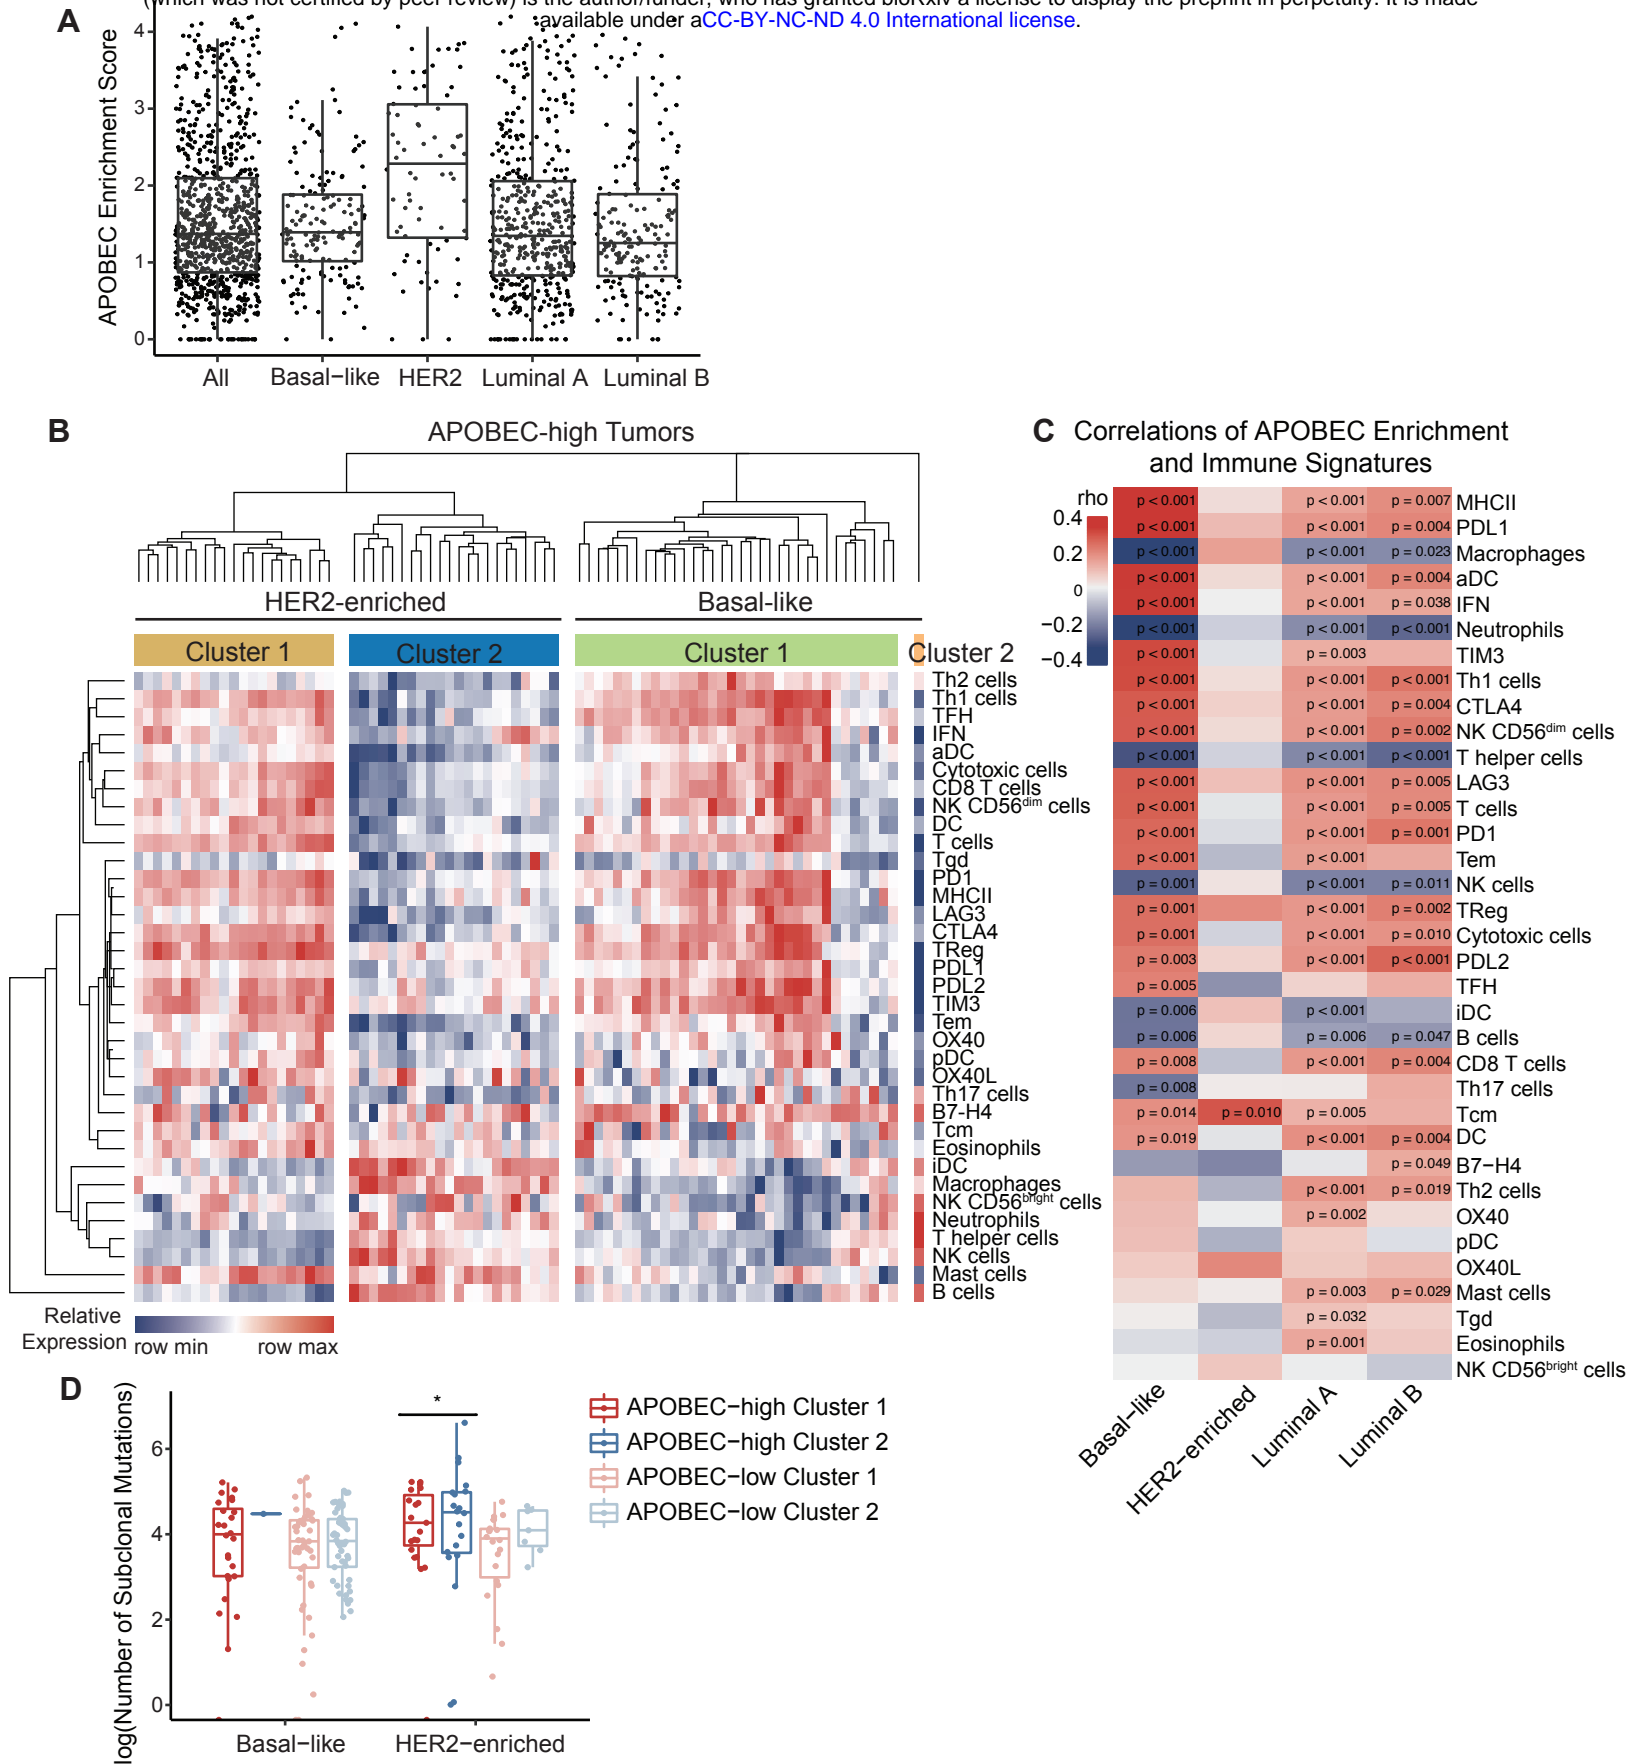

**Figure 6: The TME phenotype of APOBEC-high human breast cancers is dependent on molecular subtype and the number of subclonal mutations. (A)** APOBEC enrichment score calculated from whole-exome sequencing (WES) data for all TCGA breast cancer samples. APOBEC enrichment score of 2 or higher delineates APOBEC-high tumors. Boxplots show 25th percentile, median, and 75th percentile, while whiskers show minimum and maximum values excluding outliers. **(B)** Heatmap showing the relative expression of immune cell gene signatures from TCGA RNA-seq data in APOBEC-high tumors, grouped by breast cancer subtype. Columns are individual patient tumors and rows are different immune cell gene signatures. Legend shows colors corresponding to relative expression levels (red, row max; blue, row min). Hierarchical clustering segregated tumors into 2 main clusters in the HER2-enriched subtype and 2 clusters in the basal-like subtype. **(C)** Heatmap showing correlation Spearman rho values between APOBEC enrichment score and immune gene signatures for each molecular subtype of breast cancer. p-values are shown and legend shows colors corresponding to rho value (red, immune signature positively correlated with APOBEC enrichment score; blue, immune signature negatively correlated with APOBEC enrichment score). **(D)** The number of subclonal mutations (from Raynaud et al.) in APOBEC-high clusters depicted in (B) and APOBEC-low clusters depicted in Supplementary Figure S9. APOBEC-high HER2-enriched tumors in cluster 2 had more subclonal mutations than tumors in cluster 1. Boxplots show 25th percentile, median, and 75th percentile, while whiskers show minimum to maximum values excluding outliers. Statistical significance was determined one-way ANOVA and Sidak's multiple comparisons test. \*  $p < 0.05$ . MHC-II, major histocompatibility complex class II antigen presentation; IFN, interferon signaling pathway; Th1 cells, type-1 T helper cells; Th2 cells, type-2 T helper cells; Tgd, T gamma delta cells; Treg, T regulatory cells; Tem, T effector memory cells; Tcm, T central memory cells; TFH, T follicular helper cells; Th17, T helper 17 cells; DC, dendritic cells; aDC, activated dendritic cells; iDC, immature dendritic cells; pDC, plasmacytoid dendritic cells; CD56dim NK cells, CD56 dim natural killer cells; CD56bright NK cells, CD56 bright natural killer cells.



Supplementary Figure S1

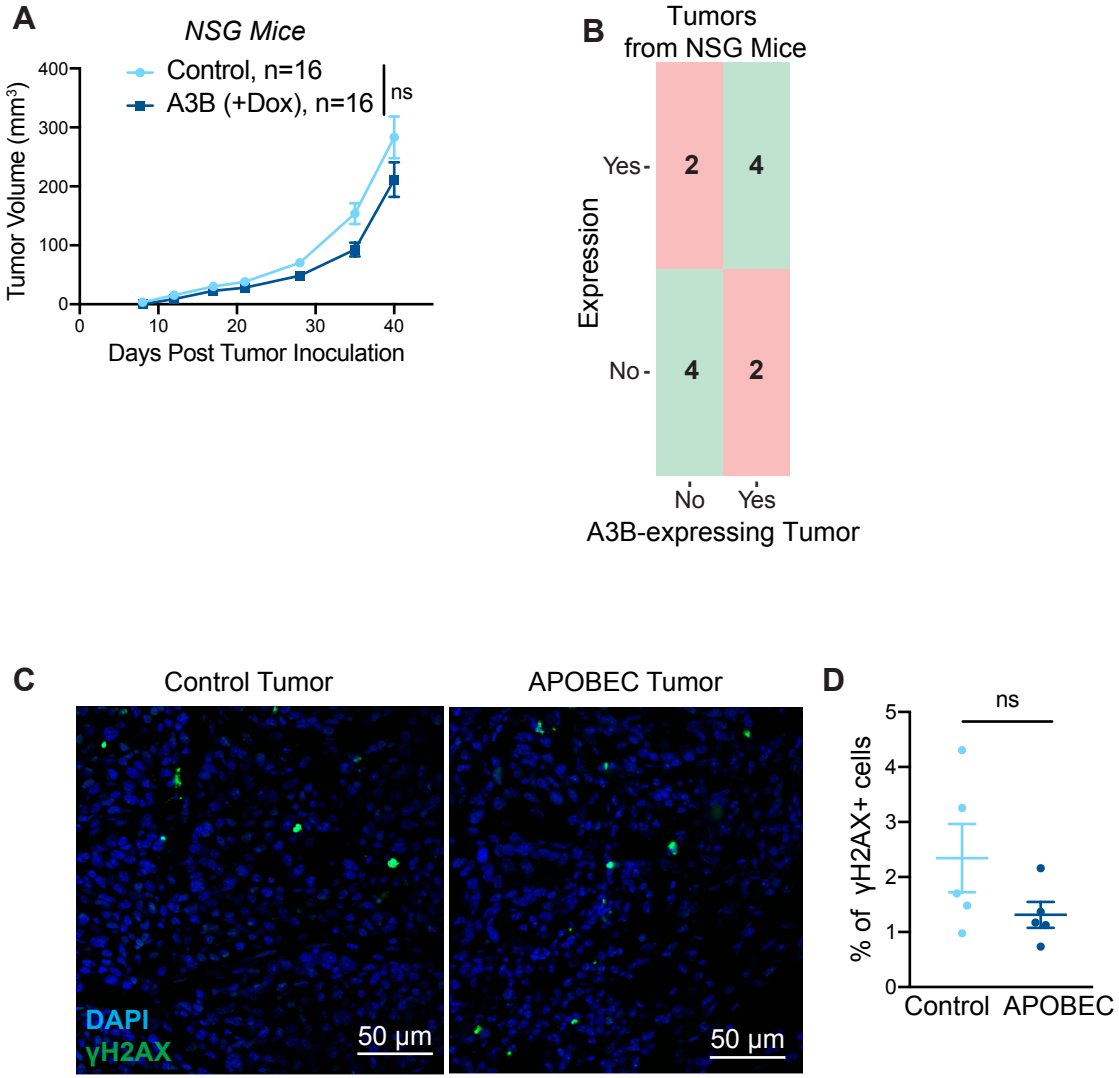

**E**

-Dox    +Dox    -Dox +Dox

Cleaved PARP

A3B-HA

γH2AX

H2A

α-Tubulin

**Supplementary Figure S1: A3B expression does not alter tumor growth in immunodeficient mice and induces an APOBEC mutational gene expression signature without activating the DNA damage response. (A)** Tumor volume (mm<sup>3</sup>) over time for control (n=16) and A3B-expressing tumors (+dox in drinking water; n=16) growing in NSG mice. Error bars denote mean ± SEM. Statistical significance was determined by two-way repeated-measures ANOVA and Tukey's multiple comparisons test with the same control cohort as in Supplementary Fig. S5J. **(B)** Confusion matrix of 10 gene predictor applied to sample of 12 mouse tumors in NSG mice (6 A3B-expressing tumors and 6 control tumors). Squares in red (upper left and bottom right) denote incorrect classifications and squares in green (upper right and bottom left) represent correct classifications. Sensitivity and specificity were both 66%. **(C-D)** Immunofluorescence staining for γH2AX on control and APOBEC tumors growing in wildtype mice (see Figure 2B). Representative images are shown in (C) and quantification of γH2AX+ foci (number of foci/number of cells per field of view) is shown in (D). Five tumors per cohort were analyzed and 8 fields of view were averaged per tumor. DAPI is in blue and γH2AX is in green. Error bars denote mean ± SEM and statistical significance was determined by unpaired Student's t-test. **(E)** Western blot analysis of HA-epitope tagged A3B, γH2AX, and cleaved PARP in SMF-A3B cells treated with or without dox for 2 weeks. α-Tubulin and histone H2A are shown as loading controls. ns > 0.05

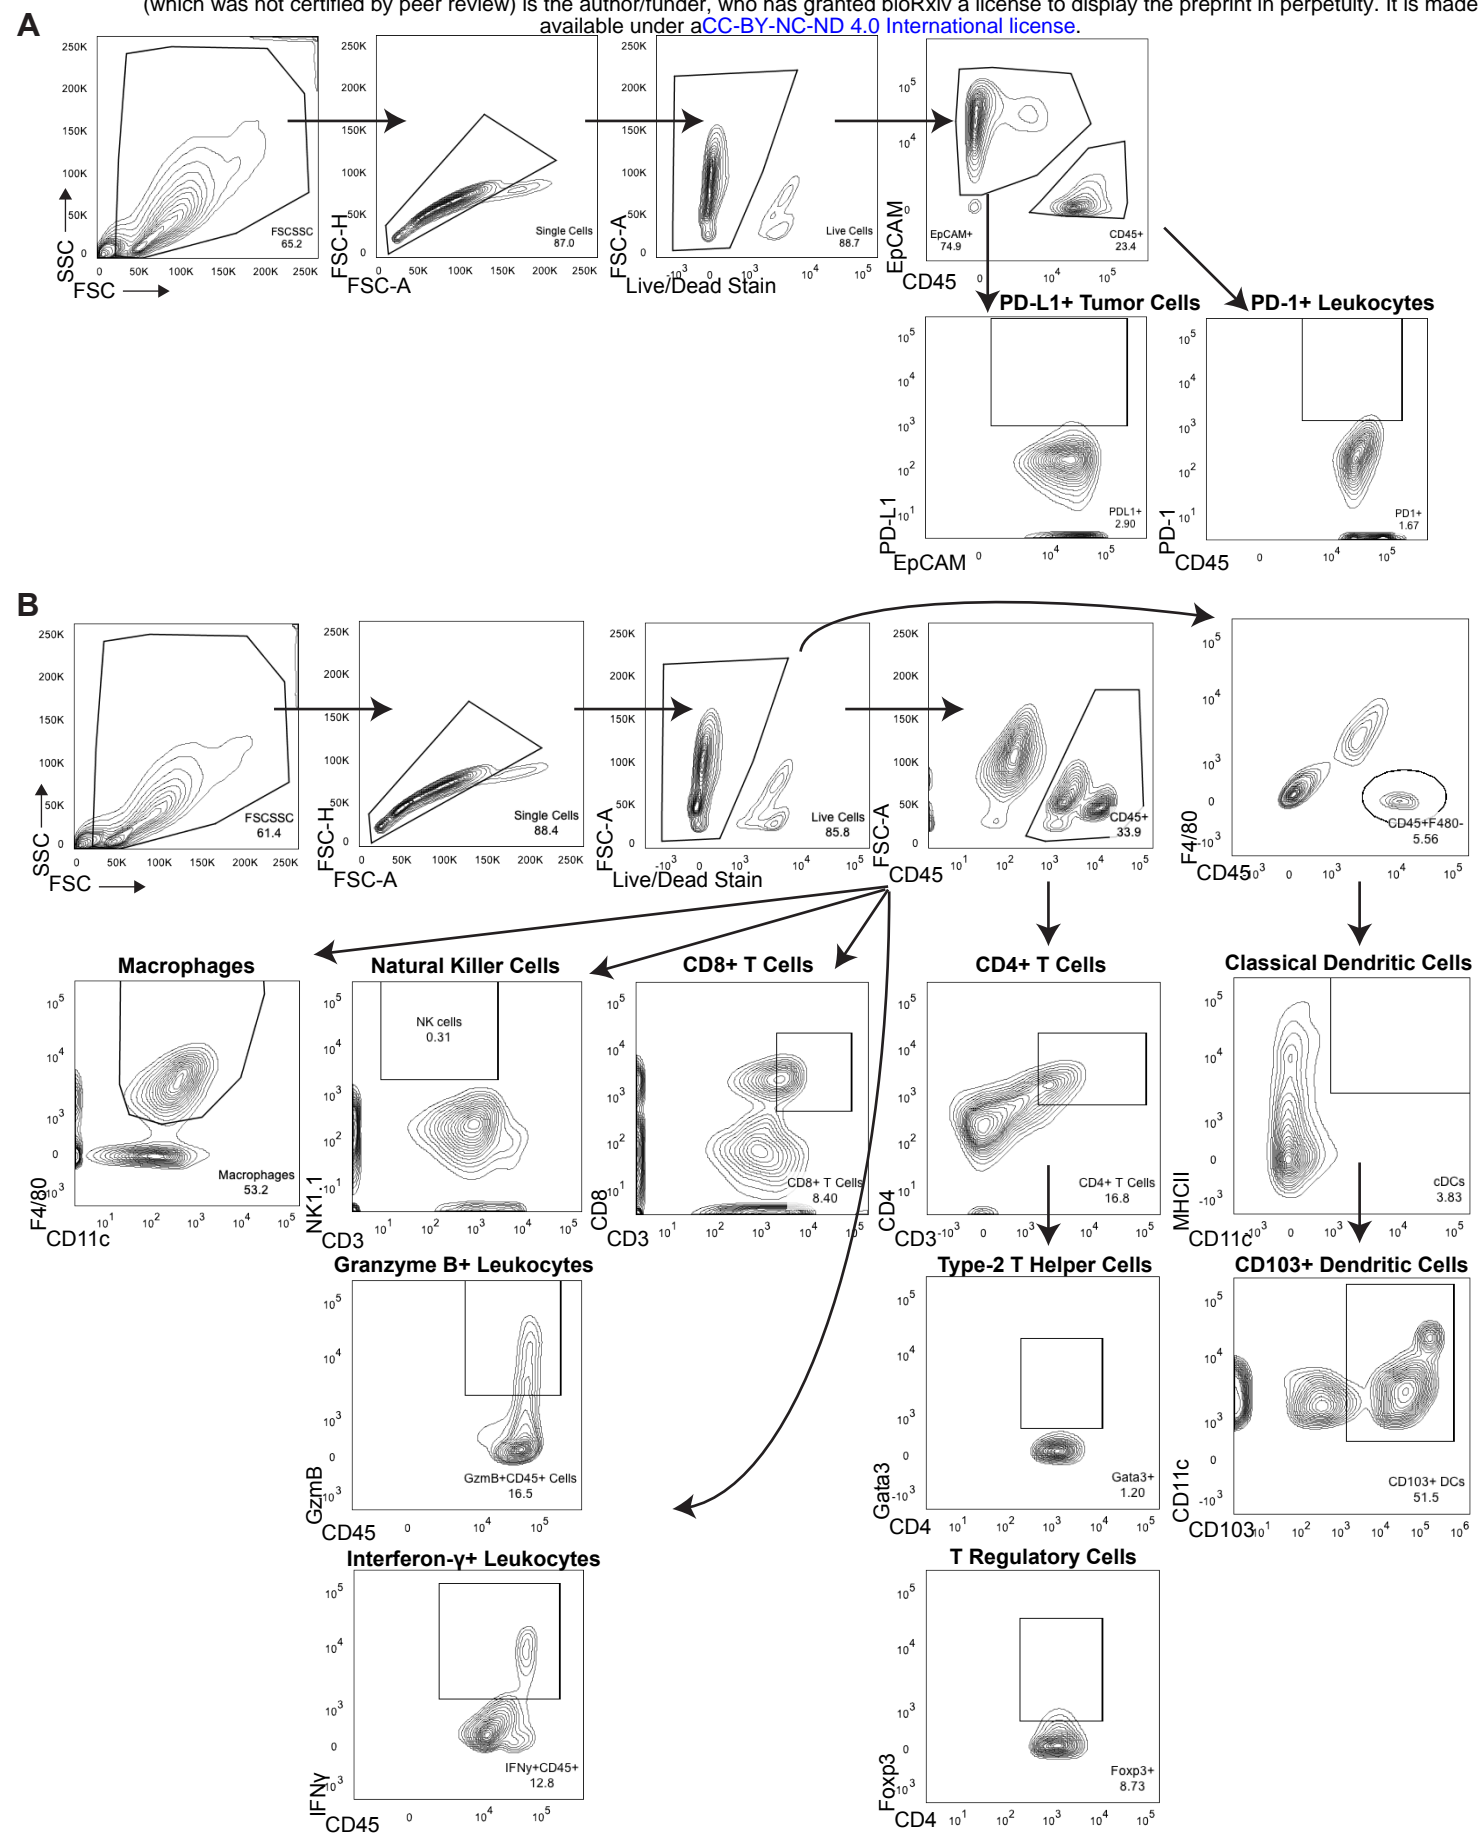

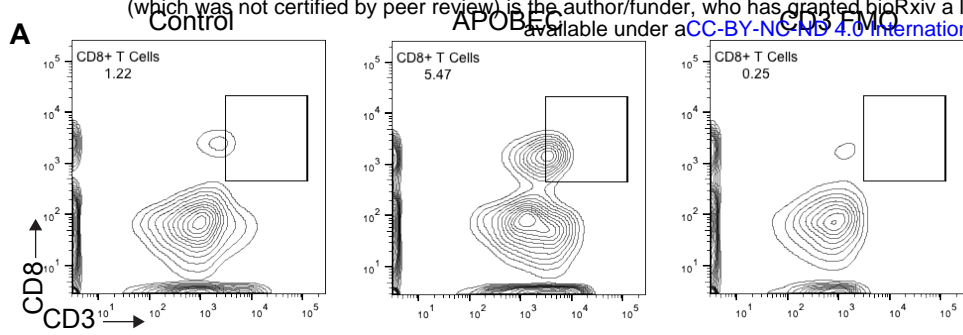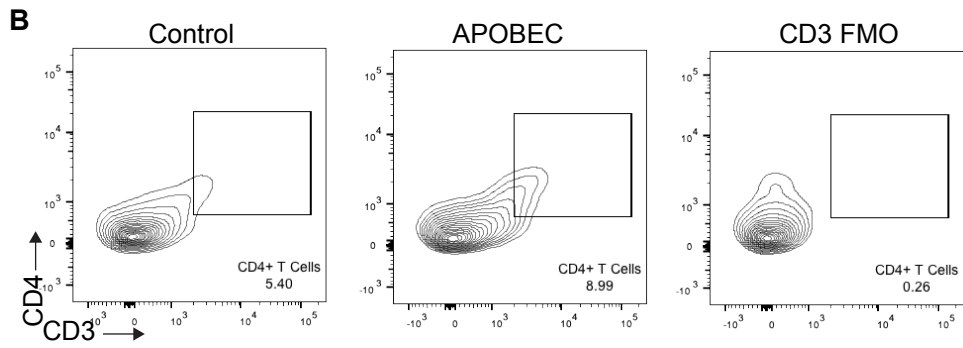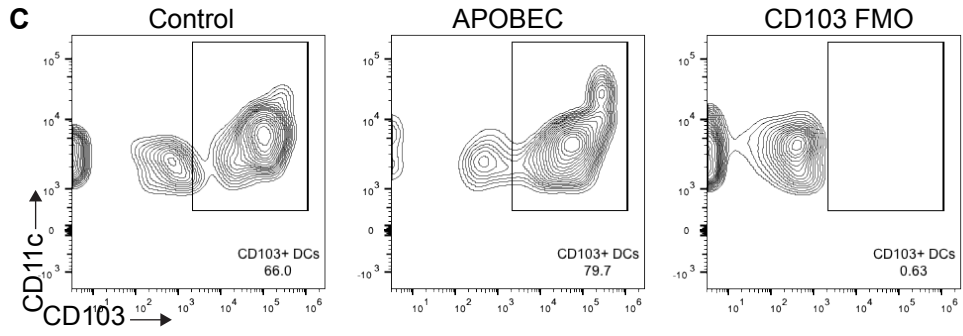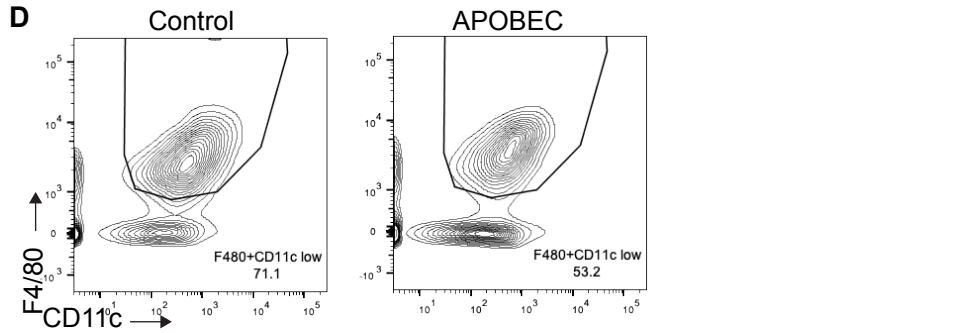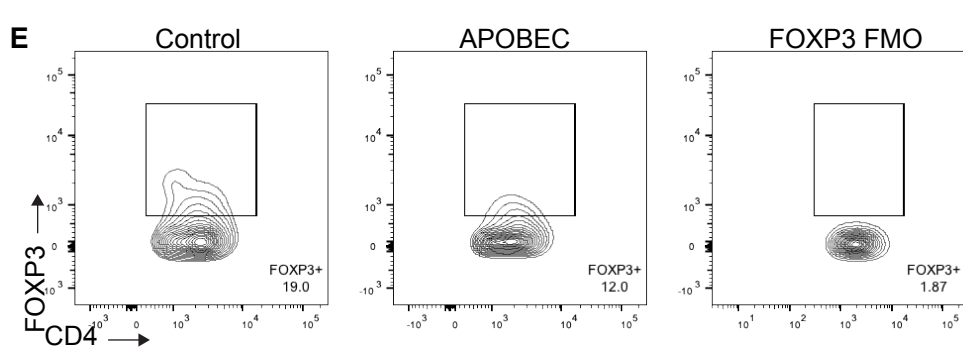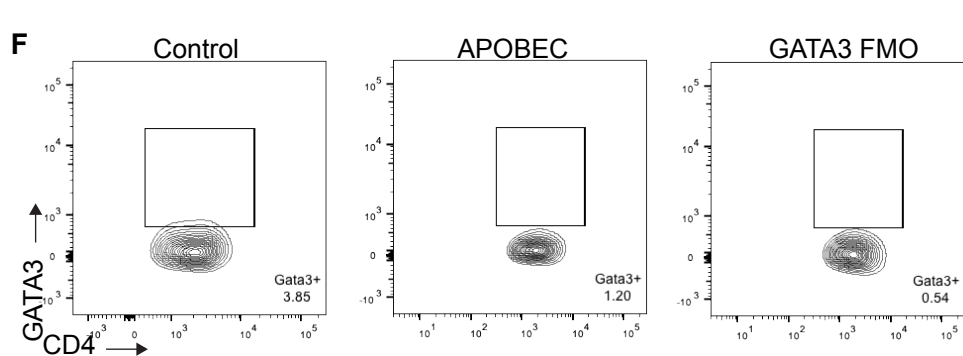

**Supplementary Figure S3:**  
**Representative FACS plots showing immune cell infiltration in APOBEC tumors. (A)** Staining for CD8+ T cells (CD8+CD3+) and CD3 fluorescence minus one (FMO) control without CD3 antibody. **(B)** Staining for CD4+ T cells (CD4+CD3+) and CD3 FMO. **(C)** Staining for CD103 expression on dendritic cells (CD103+CD11c+) and CD103 FMO. **(D)** Staining for macrophages (F4/80+CD11c<sup>low</sup>). **(E)** Staining for T regulatory cells (CD4+FOXP3+) and FOXP3 FMO. **(F)** Staining for Type-2 T helper cells (CD4+GATA3+) and GATA3 FMO.

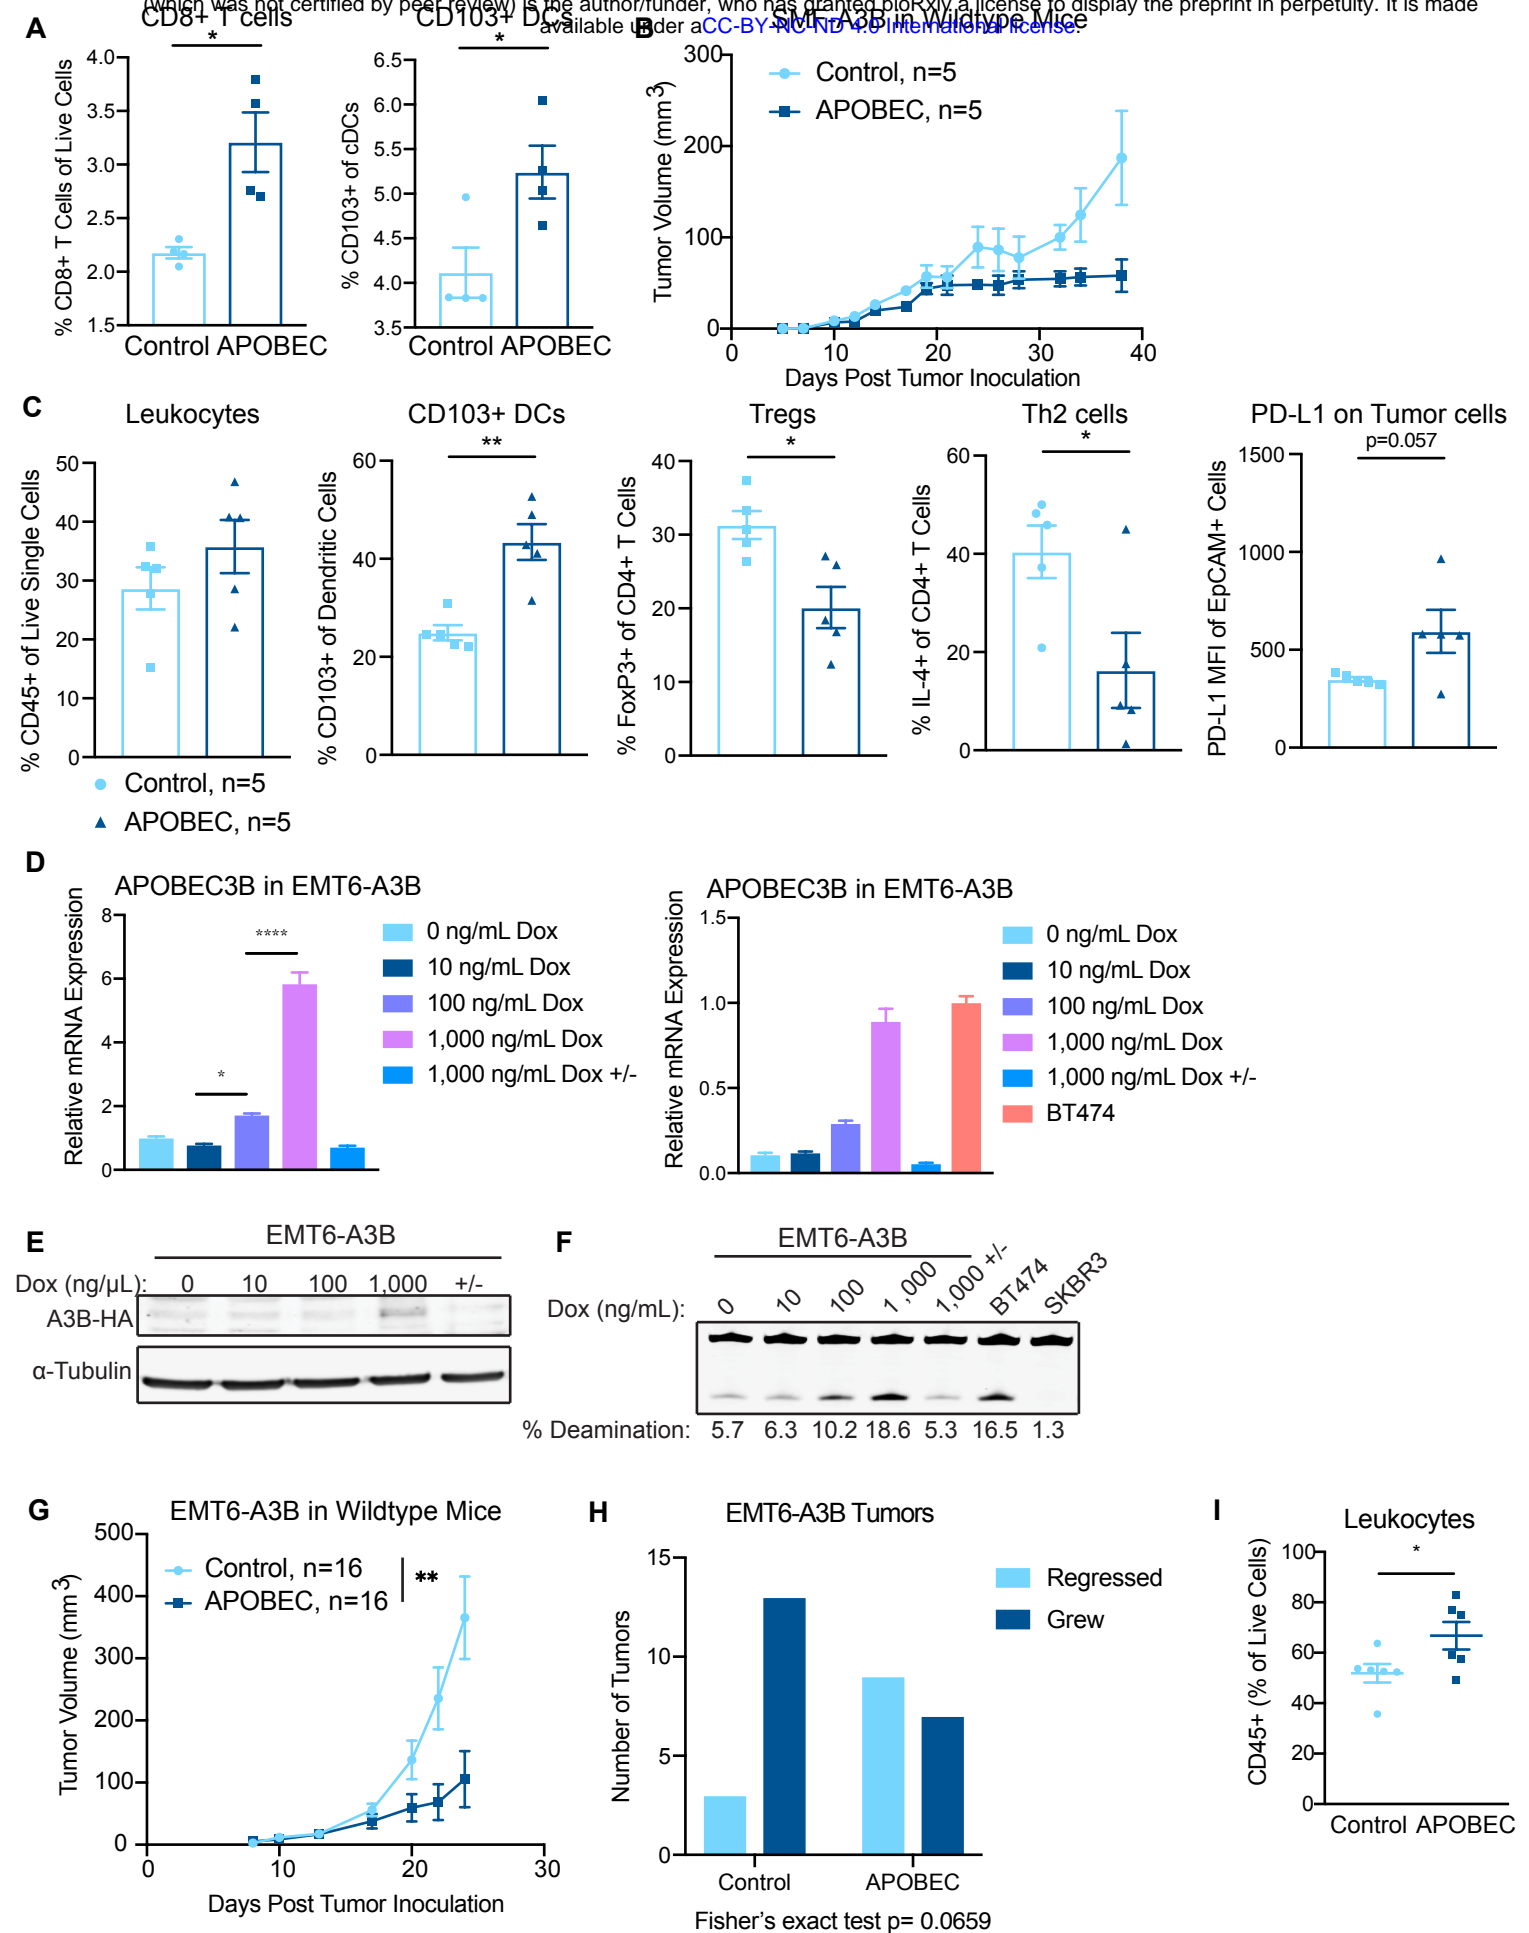

**Supplementary Figure S4: Tumor growth inhibition and increased immune infiltration in APOBEC tumors is reproducible and generalizable.** **(A)** Bilateral tumor-draining inguinal lymph nodes (TDLN) were harvested from mice in Figure 2B and aggregated from 4 mice per cohort for flow cytometry. APOBEC TDLNs had increased CD8<sup>+</sup> T cells and CD103<sup>+</sup> DCs compared to control TDLNs. Error bars denote mean  $\pm$  SEM and statistical significance was determined by unpaired Student's t-test. **(B)** Tumor volume (mm<sup>3</sup>) over time for unilateral control tumors (n=5), and APOBEC tumors (n=5) generated from SMF-A3B cells in wildtype mice in an independent experiment, demonstrating that the growth defect of APOBEC tumors is reproducible in an independent experiment. Error bars denote mean  $\pm$  SEM. **(C)** Control tumors (n=5) and APOBEC tumors (n=5) from (B) were harvested and immune profiled by flow cytometry. Quantification shows the APOBEC tumors had increased leukocytes, CD103<sup>+</sup> dendritic cells (DCs), and tumor cell PD-L1 expression (MFI, mean fluorescence intensity), while T regulatory cells (Tregs) and type-2 T helper (Th2) cells were reduced in APOBEC tumors. These results demonstrate that immune infiltration in APOBEC tumors is reproducible in an independent experiment. Error bars denote mean  $\pm$  SEM and statistical significance was determined by unpaired Student's t-test. **(D)** qRT-PCR analysis for APOBEC3B expression in EMT6-A3B cultured with or without dox for 2 days. 1,000 ng/mL Dox +/- indicates cells cultured with 1,000 ng/mL dox for 2 days followed by removal of dox for 3 days prior to analysis. Left: A3B expression relative to 0  $\mu$ g/mL dox condition. Right: A3B expression relative to BT474 cells. Results show 3 biological replicates and error bars depict mean  $\pm$  SEM. Significance was determined using a one-way ANOVA and Tukey's multiple comparisons test. **(E)** EMT6-A3B cells were cultured as in (D) and cell lysates were harvested for western blot of HA-tagged A3B protein. **(F)** EMT6-A3B cells were cultured as in (D) and cell lysates harvested for in vitro deaminase activity assay. Deaminase activity is comparable to that of human cell line, BT474. SKBR3 human cell line is A3B-null and shown as a negative control. **(G)** Tumor volume curves for control (-dox; n=16) and APOBEC (+dox; n=16) tumors derived from EMT-A3B cells orthotopically implanted in the mammary gland of syngeneic BALB/c mice. Error bars denote mean  $\pm$  SEM and statistical significance was determined by two-way repeated-measures ANOVA. **(H)** The fraction of control and APOBEC EMT6 tumors that grew or spontaneously regressed following tumor cell injection. Fisher's exact test, p=0.0659. **(I)** Flow cytometry quantification of leukocytes in control (n=6) and APOBEC (n=6) EMT6 tumors from (G). Error bars denote mean  $\pm$  SEM and statistical significance was determined by unpaired Student's t-test. \* p < 0.05, \*\* p < 0.01, \*\*\*\* p < 0.0001



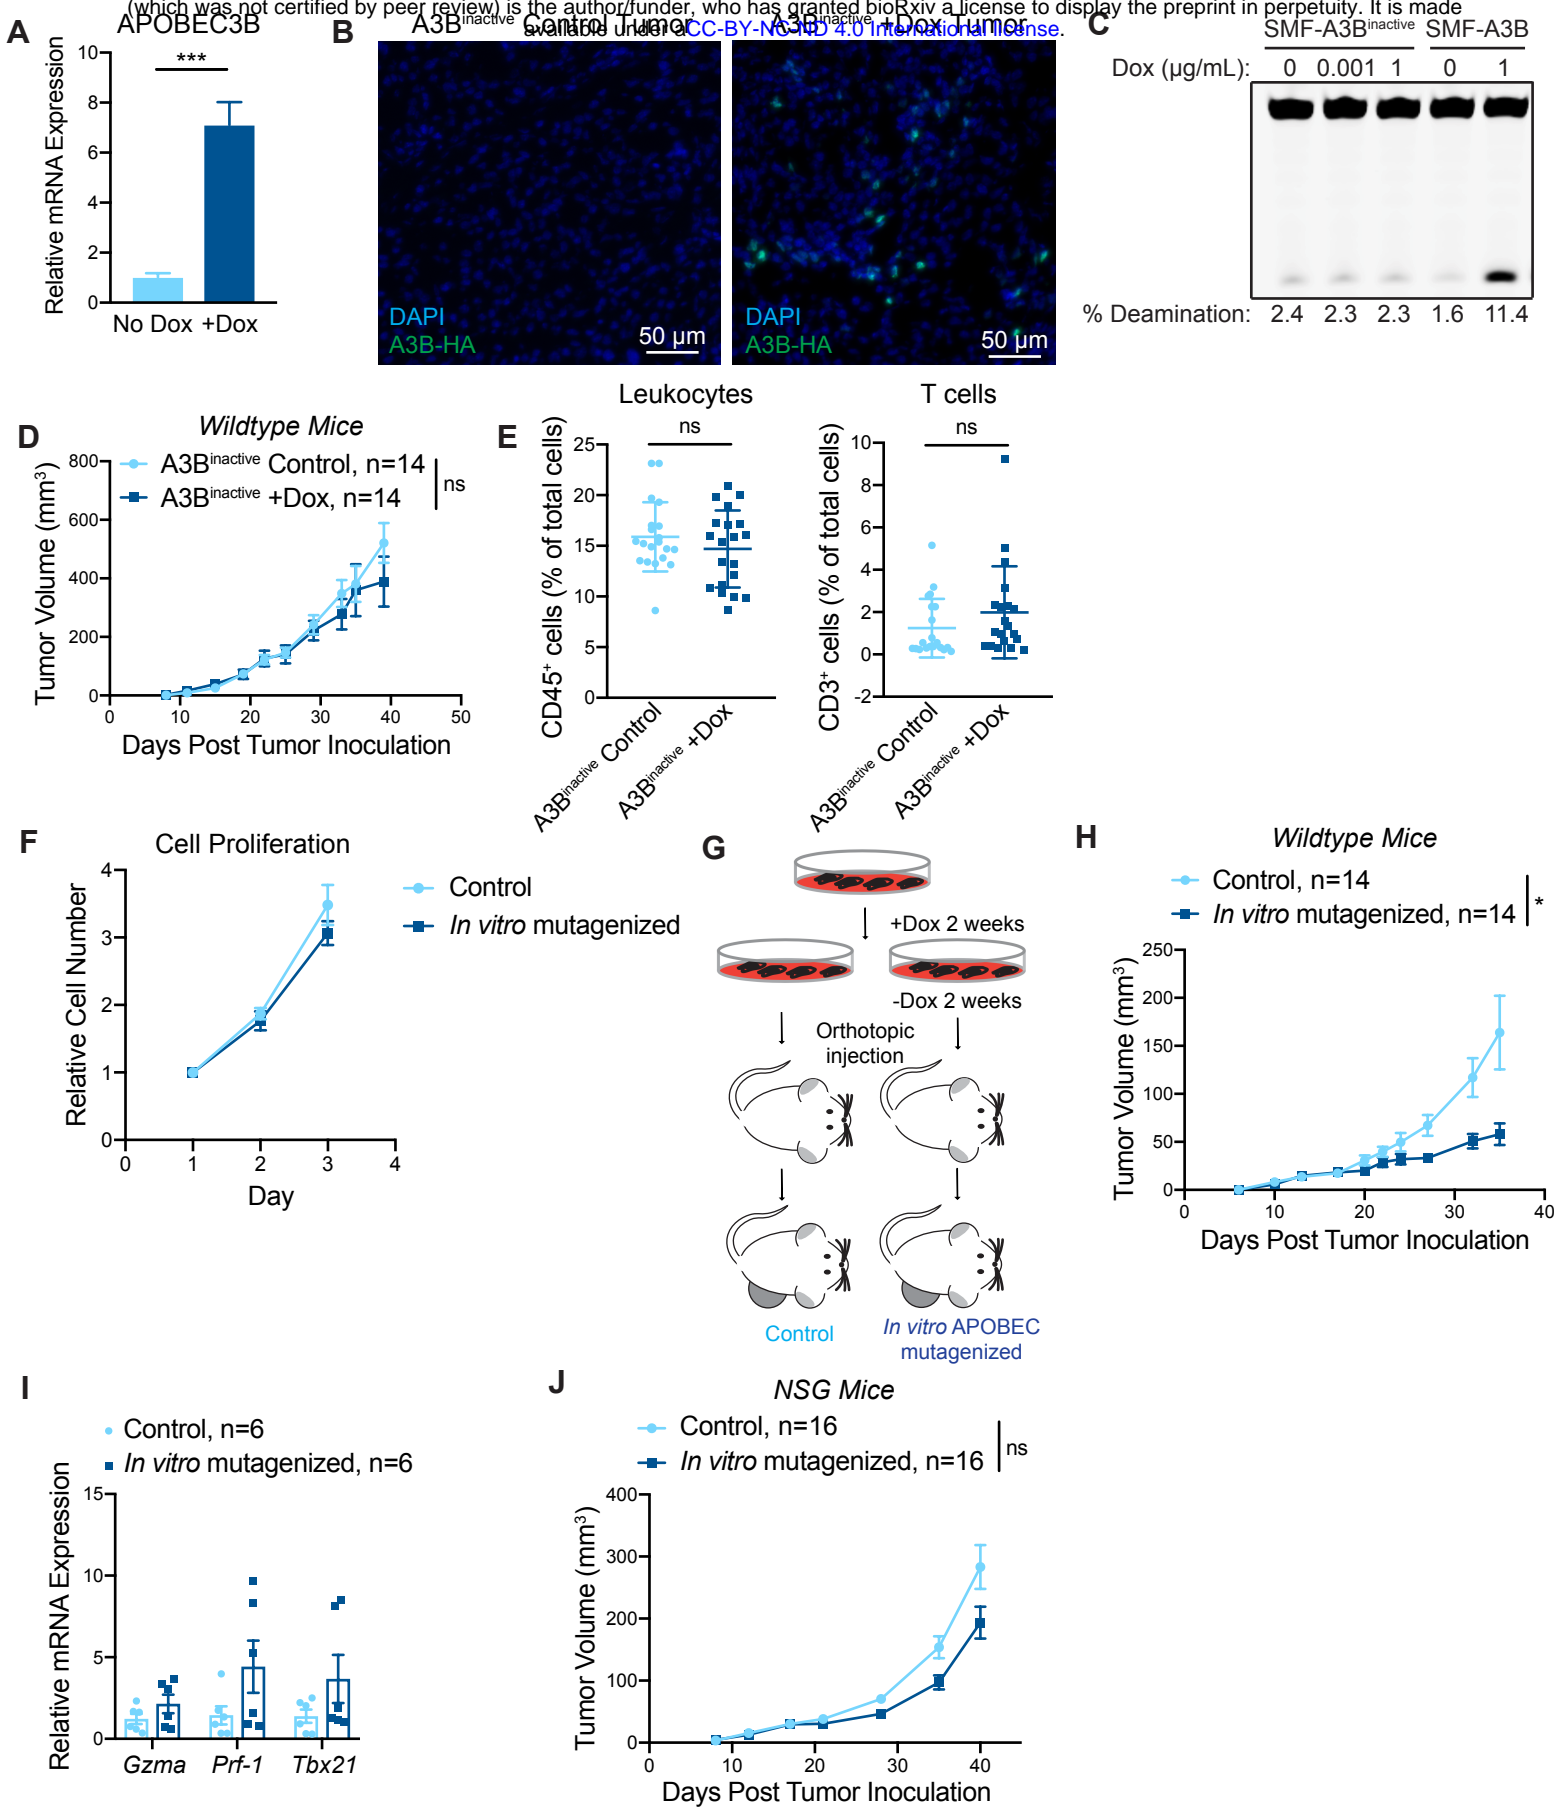

**Supplementary Figure S5: The APOBEC tumor growth defect requires the catalytic activity of A3B.** **(A)** qRT-PCR of A3B gene expression in SMF-A3B<sup>inactive</sup> cells treated with 1 ug/mL dox for 5 days. Error bars denote mean  $\pm$  SD for 3 technical replicates and statistical significance was determined by unpaired Student's t-test. **(B)** Immunofluorescence staining for HA epitope-tagged A3B in control tumors (-dox) and tumors expressing A3B<sup>inactive</sup> (+dox). **(C)** In vitro deaminase activity assay in SMF-A3B<sup>inactive</sup> cells treated with dox. SMF-A3B cells are shown as a control. **(D)** Tumor volume (mm<sup>3</sup>) over time for control tumors (-dox; n=14) and tumors expressing A3B<sup>inactive</sup> (+dox; n=14) in wildtype mice. Error bars denote mean  $\pm$  SEM. Statistical significance was determined by two-way repeated-measures ANOVA. **(E)** Quantification of IHC staining for CD45 (left) or CD3 (right) in control tumors (n=5) and tumors expressing A3B<sup>inactive</sup> (n=5). Four fields of view were quantified for each tumor. Error bars denote mean  $\pm$  SD. Statistical significance was determined by unpaired Student's t-test. **(F)** Growth curves for control and in vitro APOBEC mutagenized cells. Data are shown as mean  $\pm$  SD of 4 replicates. **(G)** Schematic showing experimental design for tumor growth experiment. SMF-A3B cells were cultured with or without dox for 2 weeks, then dox was removed for 2 weeks. These in vitro APOBEC mutagenized cells or control cells were orthotopically implanted in the mammary gland of mice in the absence of dox. **(H)** Tumor volume (mm<sup>3</sup>) over time for control (n=14) and in vitro APOBEC mutagenized tumors (n=14) in wildtype mice. Error bars denote mean  $\pm$  SEM. Statistical significance was determined by two-way repeated-measures ANOVA. **(I)** qRT-PCR analysis for Granzyme A (Gzma), Perforin-1 (Prf-1), and T-bet (Tbx21) in control (n=6) and in vitro APOBEC mutagenized tumors (n=6). All genes showed a trend toward increased expression in the in vitro APOBEC mutagenized cohort that did not reach statistical significance. **(J)** Tumor volume (mm<sup>3</sup>) over time for control (n=16) and in vitro APOBEC mutagenized tumors (n=16) in NSG mice. Error bars denote mean  $\pm$  SEM. Statistical significance was determined by two-way repeated-measures ANOVA and Tukey's multiple comparisons test. Note that control mice are the same as in S1A. ns p > 0.05, \*\* p < 0.01, \*\*\* p < 0.001

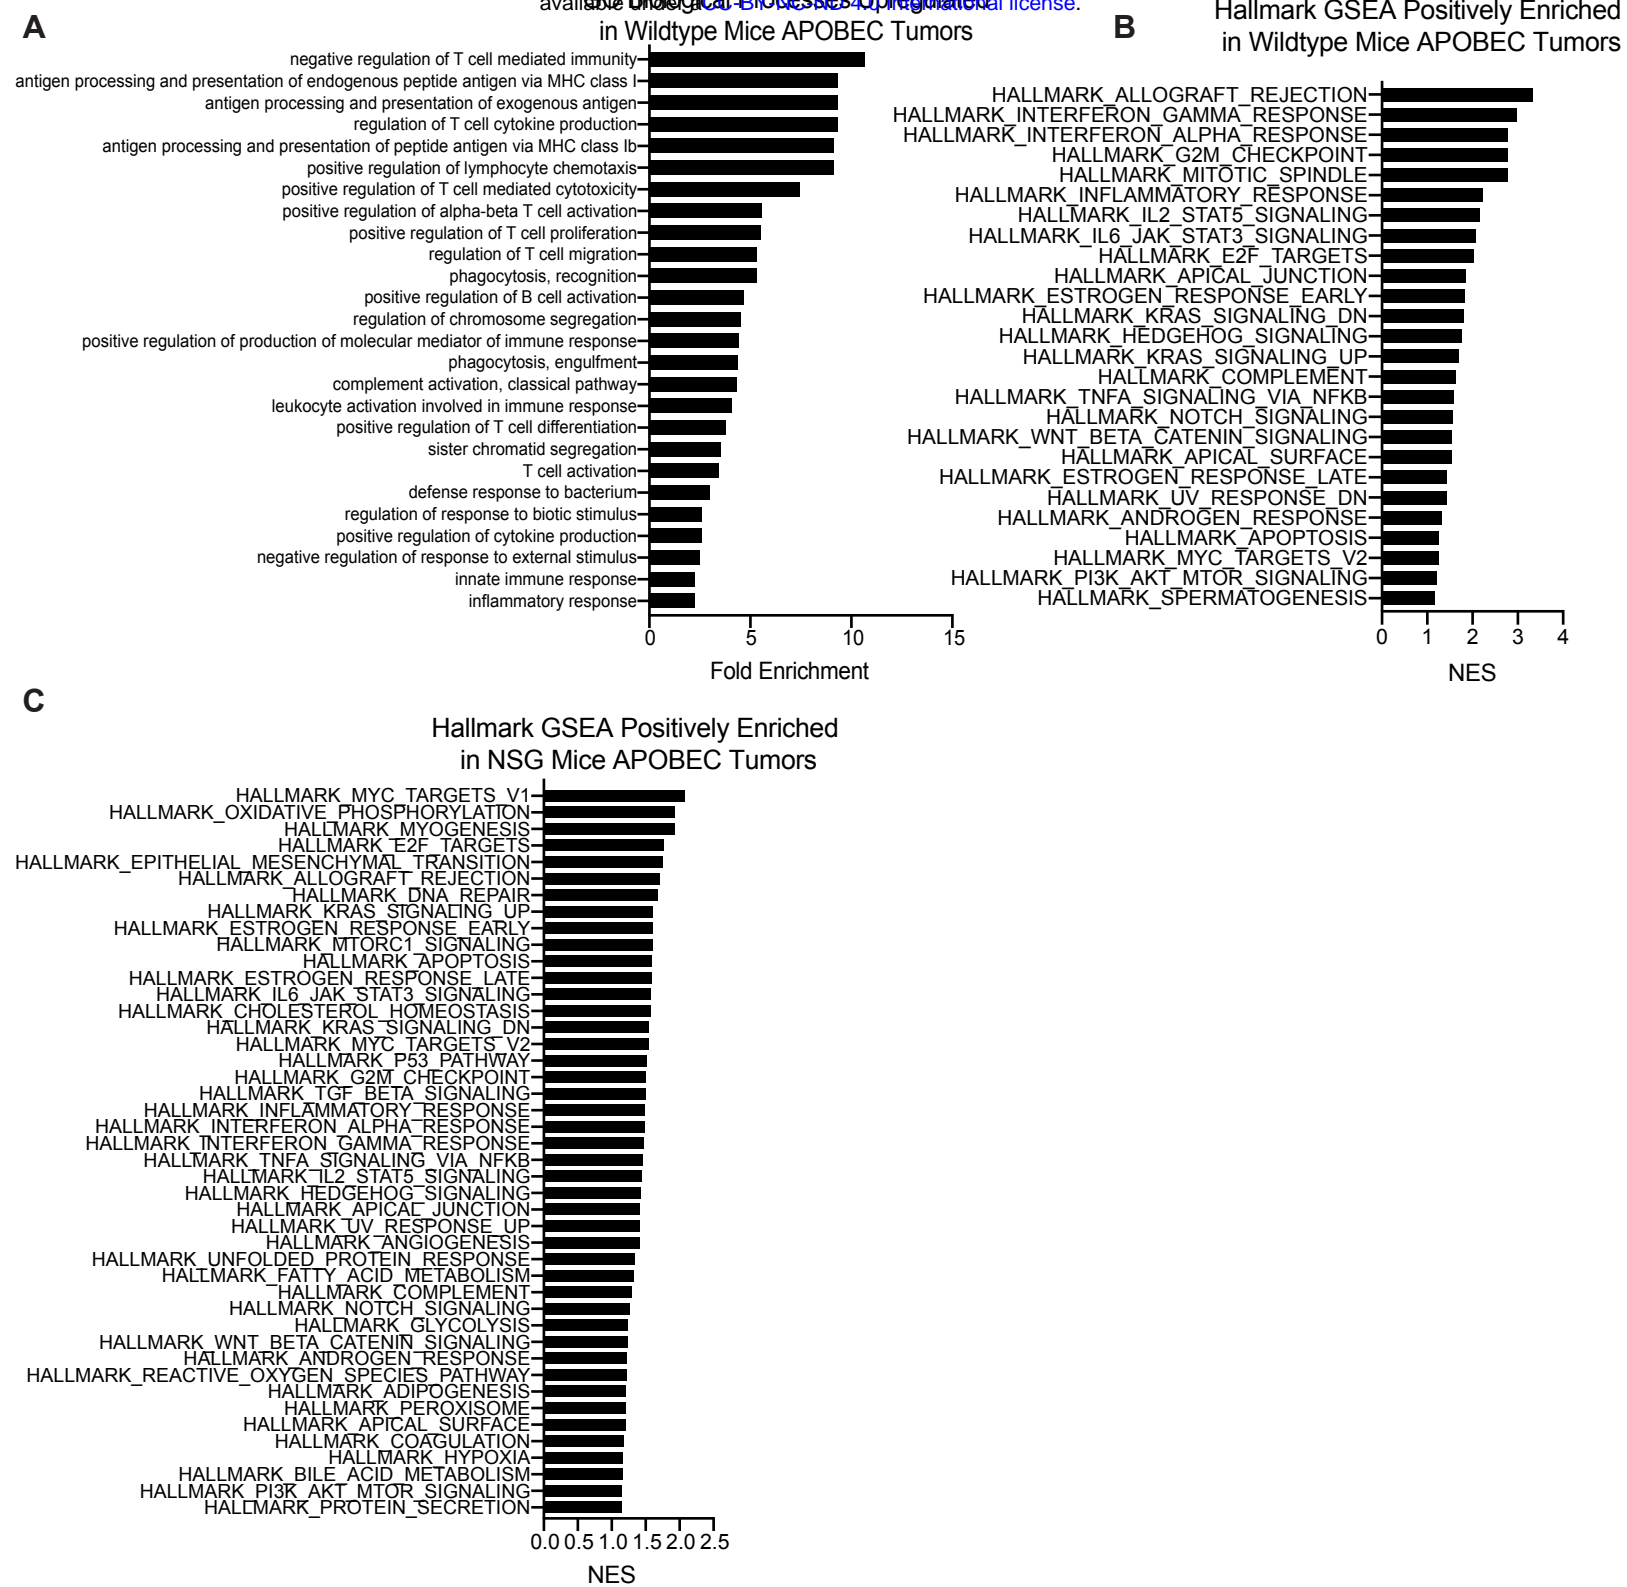

**Supplementary Figure S6: Gene expression analysis of control and APOBEC tumors. (A)** All statistically significant main GO biological processes upregulated in APOBEC tumors from wildtype mice (FDR adjusted  $p < 0.05$  by Fisher's test). Fold enrichment is shown for each. **(B)** All statistically significant GSEA Hallmark pathways positively enriched in APOBEC tumors from wildtype mice (FDR adjusted  $p < 0.25$ ). Normalized enrichment score (NES) is shown for each. **(C)** All statistically significant GSEA Hallmark pathways positively enriched in APOBEC tumors from NSG mice (FDR adjusted  $p < 0.25$ ). Normalized enrichment score (NES) is shown for each.



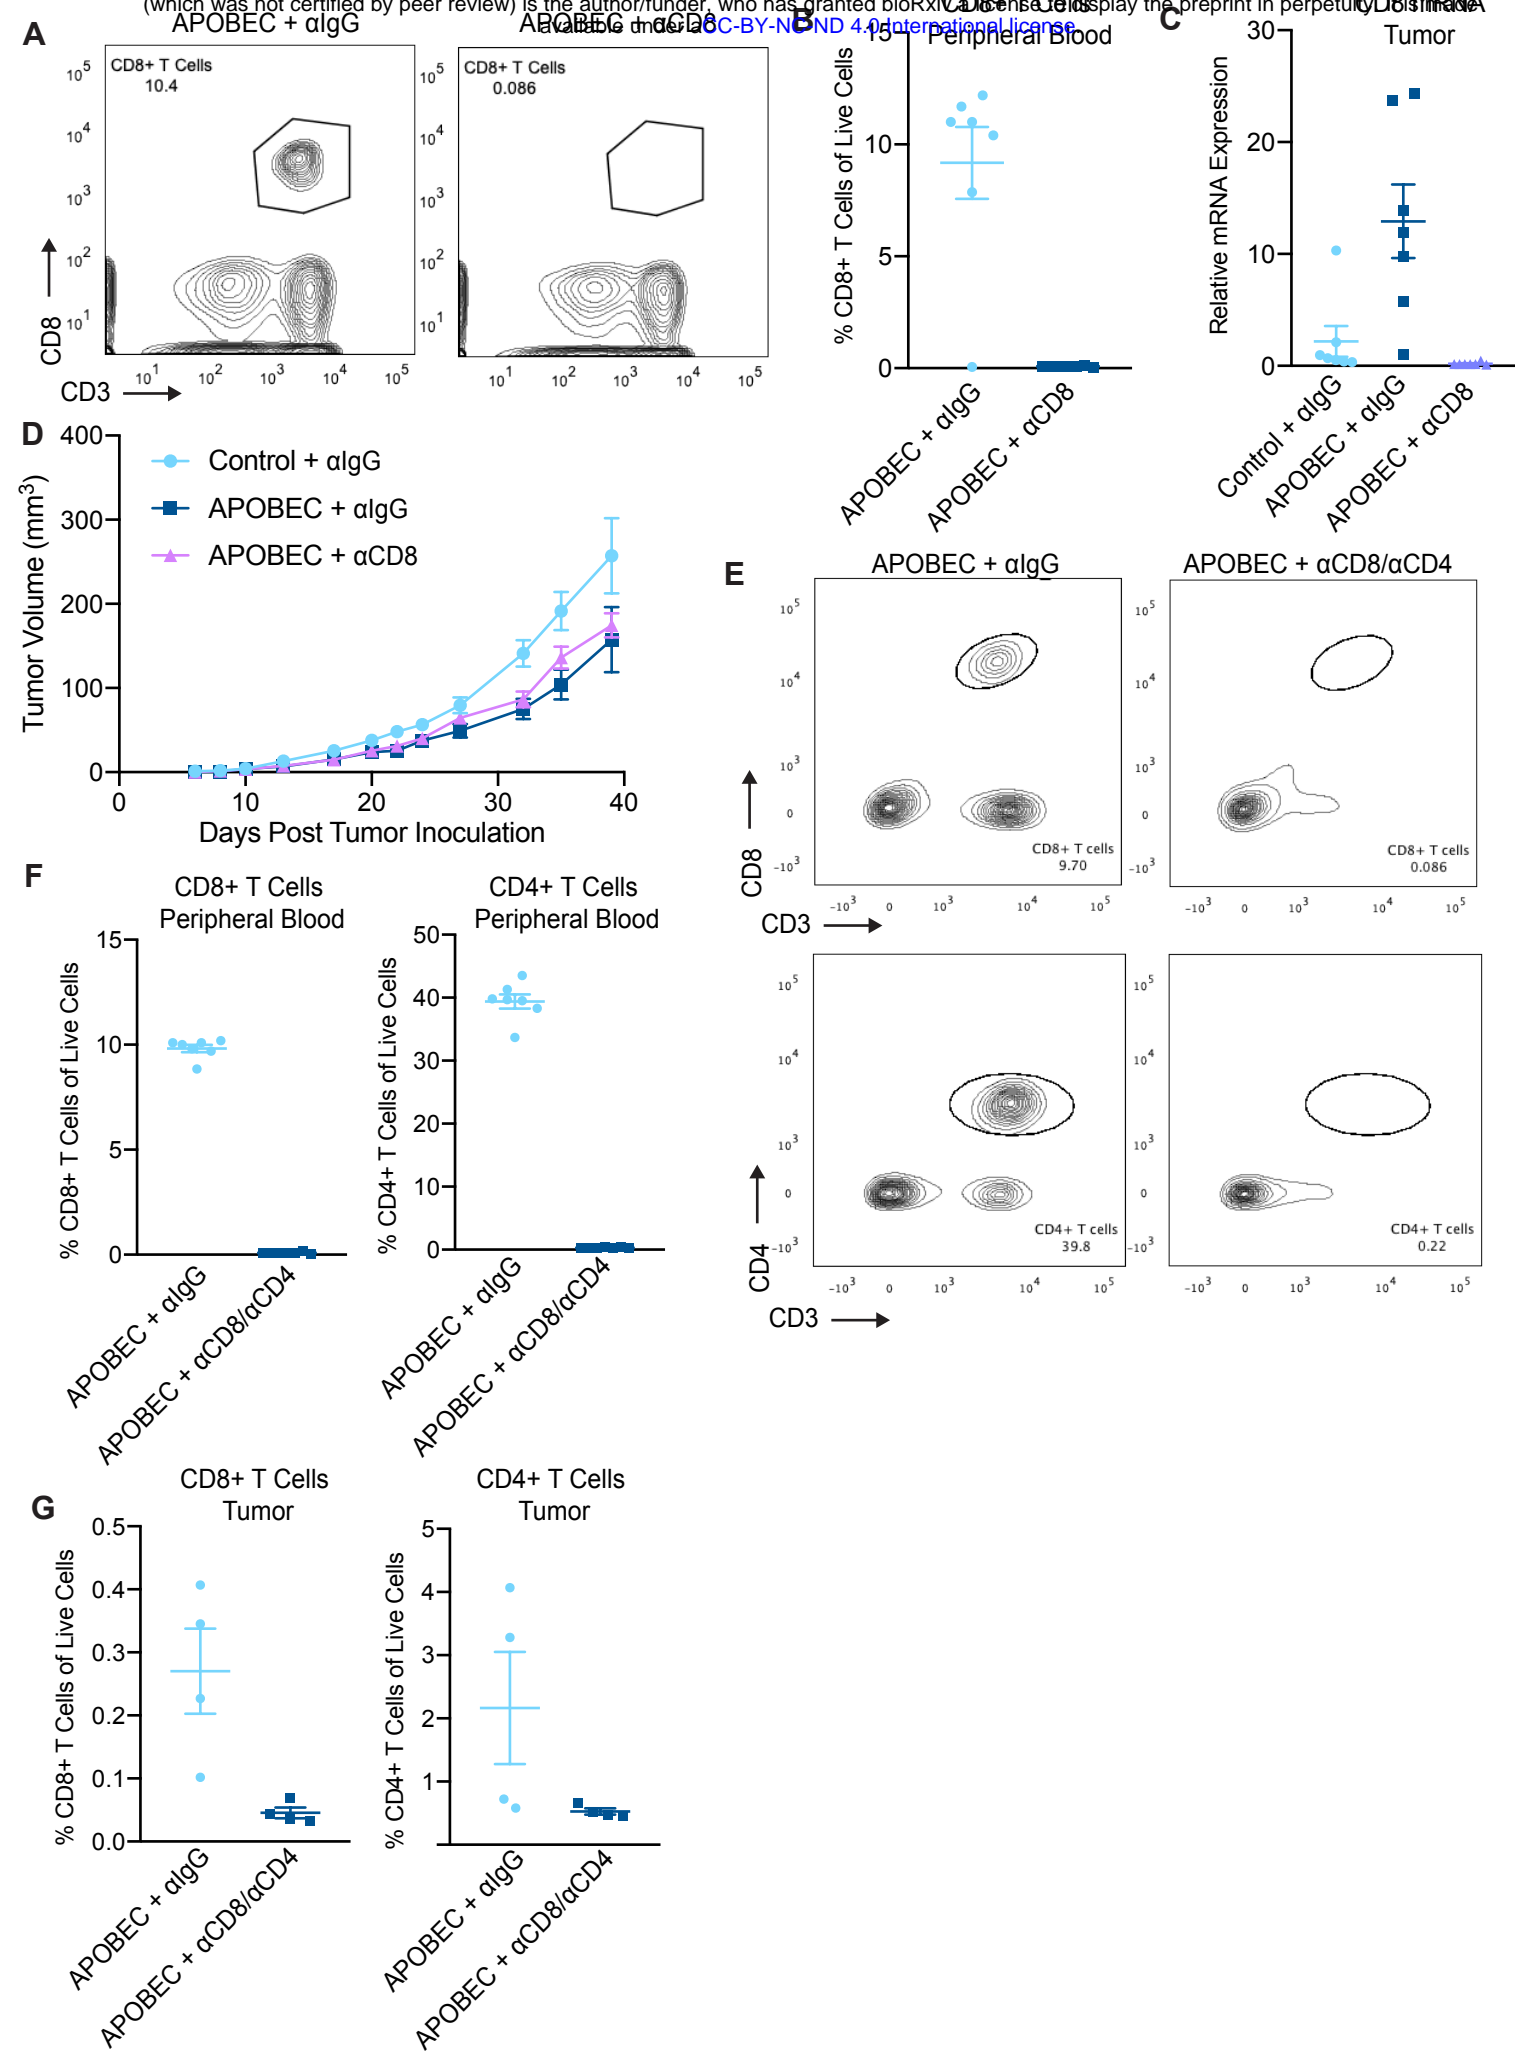

**Supplementary Figure S7: CD4+/CD8+ T cell depletion but not CD8+ T cell depletion alone rescues the growth defect of APOBEC tumors.** **(A)** Flow cytometry showing depletion of CD8+ T cells in peripheral blood following intraperitoneal injection of an in vivo CD8 depleting antibody (300 µg/dose) or isotype-control antibody twice weekly. Peripheral blood was assayed on day 9 post tumor inoculation. **(B)** Quantification of CD8+ T cells in peripheral blood of isotype-control antibody treated mice (n=7) and αCD8 antibody treated mice (n=7) as in (A). Error bars denote mean ± SEM. **(C)** qRT-PCR for CD8 expression in tumors from the indicated cohorts: control tumors + αIgG (n=7); APOBEC tumors + αIgG (n=7); APOBEC tumors + αCD8 (n=7). Error bars denote mean ± SEM. **(D)** Tumor volume (mm<sup>3</sup>) over time for control + αIgG (n=14), APOBEC + αIgG (n=14), and APOBEC + αCD8 (n=14) tumors in wildtype mice. Error bars denote mean ± SEM. **(E)** Flow cytometry showing depletion of CD8+ and CD4+ T cells in peripheral blood following intraperitoneal injection of CD8 and CD4 depleting antibodies (200 µg CD8 and 200 µg CD4/dose) or isotype-control antibody twice weekly. Peripheral blood was assayed on day 25 post tumor inoculation. **(F)** Quantification of CD4+ and CD8+ T cells in peripheral blood of isotype-control antibody treated mice (n=7) and αCD8/αCD4 antibody treated mice (n=7) as in (E). Error bars denote mean ± SEM. **(G)** Flow cytometry quantification of CD8+ and CD4+ T cells in APOBEC tumors treated with isotype-control antibody or αCD8/αCD4 depleting antibodies. Error bars denote mean ± SEM.

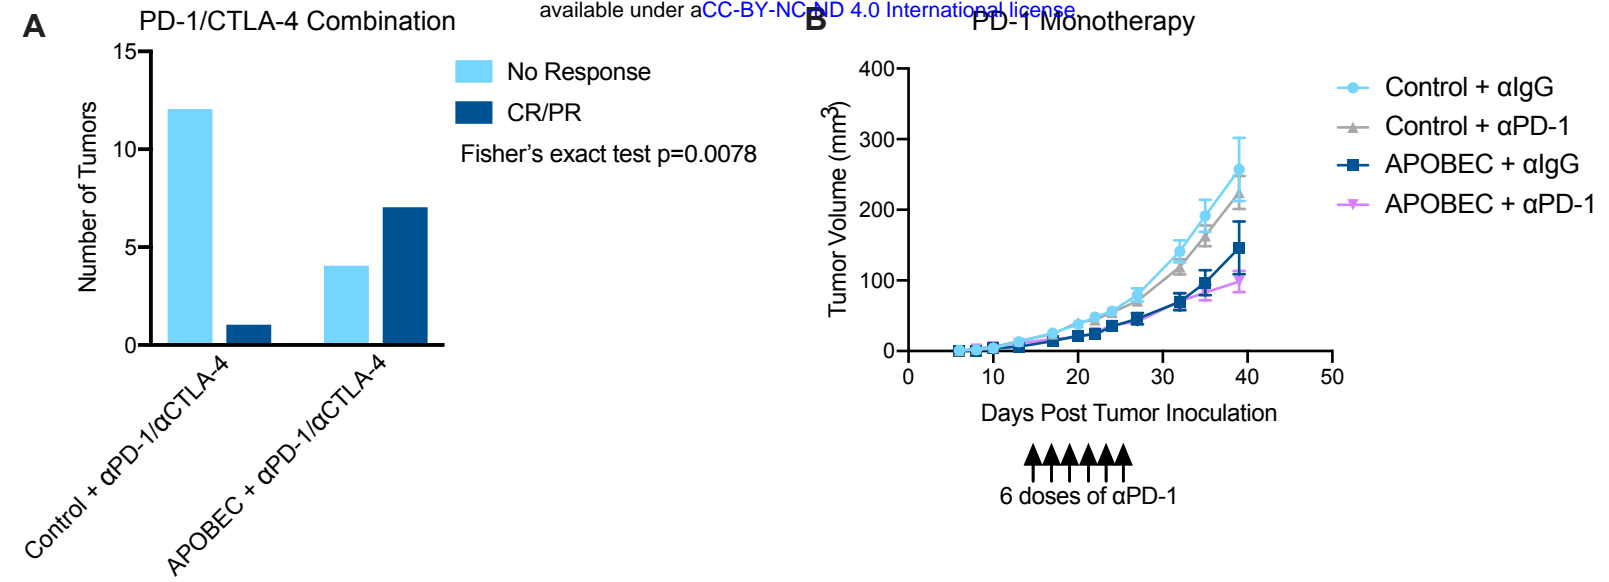

**Supplementary Figure S8: APOBEC activity renders HER2-driven mammary tumors responsive to combination anti-PD-1/anti-CTLA-4 therapy, but not anti-PD-1 monotherapy.** (A) Response of control and APOBEC tumors to combination PD-1/CTLA-4 therapy. Number of tumors with no response or complete response/partial response (CR/PR) are depicted. Statistical significance was determined by Fisher's exact test ( $p=0.0078$ ). (B) Tumor volume ( $\text{mm}^3$ ) over time for Control + algG ( $n=14$ ), Control +  $\alpha$ PD-1 ( $n=14$ ), APOBEC + algG ( $n=14$ ), and APOBEC +  $\alpha$ PD-1 ( $n=14$ ) tumors in wildtype mice. Mice were administered 6 doses of 200  $\mu\text{g}$  of PD-1 or IgG isotype antibody on day 13, 15, 17, 20, 22, 24 post-tumor inoculation. Error bars denote mean  $\pm$  SEM.

**A**

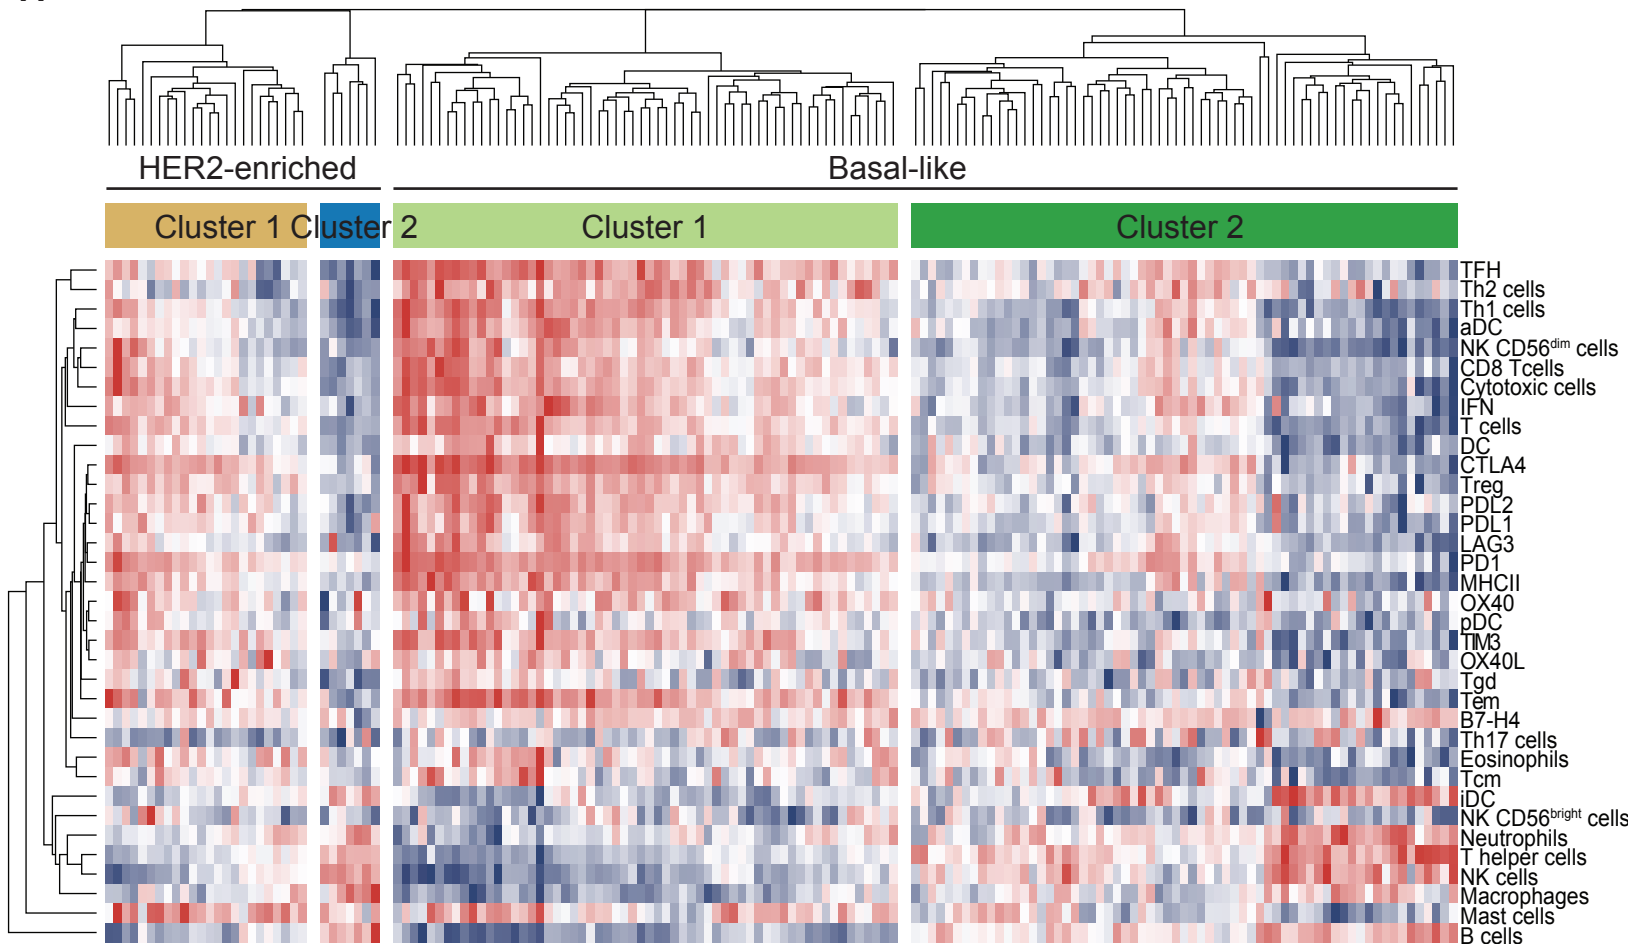

**B**

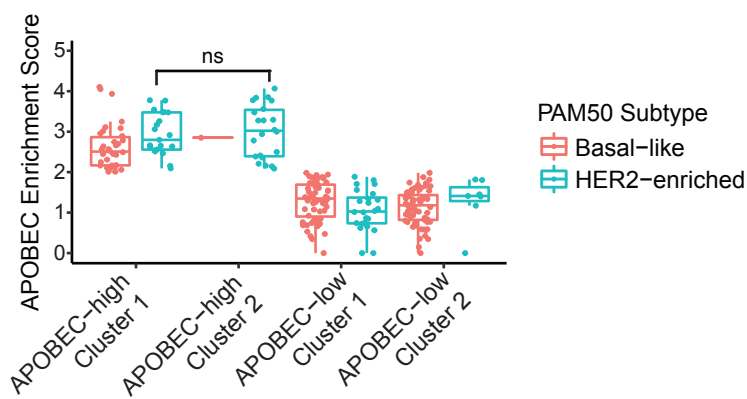

**C**

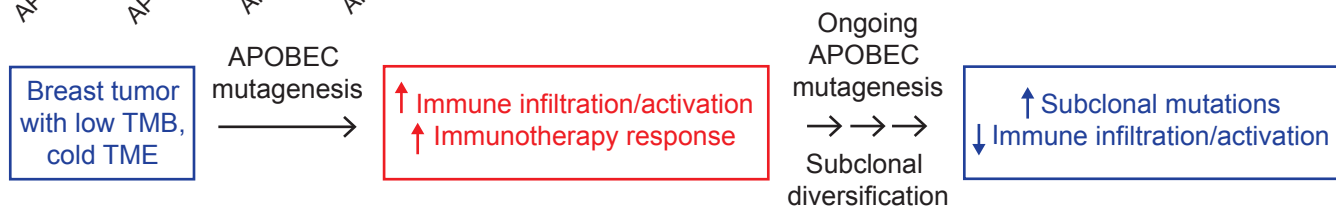

**Supplementary Figure S9: APOBEC-low TCGA tumors and immune signature clusters. (A)** Heatmap showing the relative expression of immune cell gene signatures from TCGA RNA-seq data in APOBEC-low tumors, grouped by breast cancer subtype. Columns are individual patient tumors and rows are different immune cell gene signatures. Legend shows colors corresponding to relative expression levels (red, row max; blue, row min). Hierarchical clustering segregated tumors into 2 main clusters in the HER2-enriched subtype and 2 clusters in the basal-like subtype. **(B)** APOBEC enrichment score plotted for Basal-like and HER2-enriched tumors from each cluster. Boxplots show 25th percentile, median, and 75th percentile, while whiskers show minimum to maximum values excluding outliers. Statistical significance was determined by one-way ANOVA and Sidak's multiple comparisons test. **(C)** Schematic of a model showing APOBEC mutagenesis increases immune activation, infiltration, and immunotherapy response in mouse and human breast tumors. But ongoing APOBEC mutagenesis can also generate subclonal diversification, which leads to increased subclonal mutations and decreased immune activation. ns  $p > 0.05$

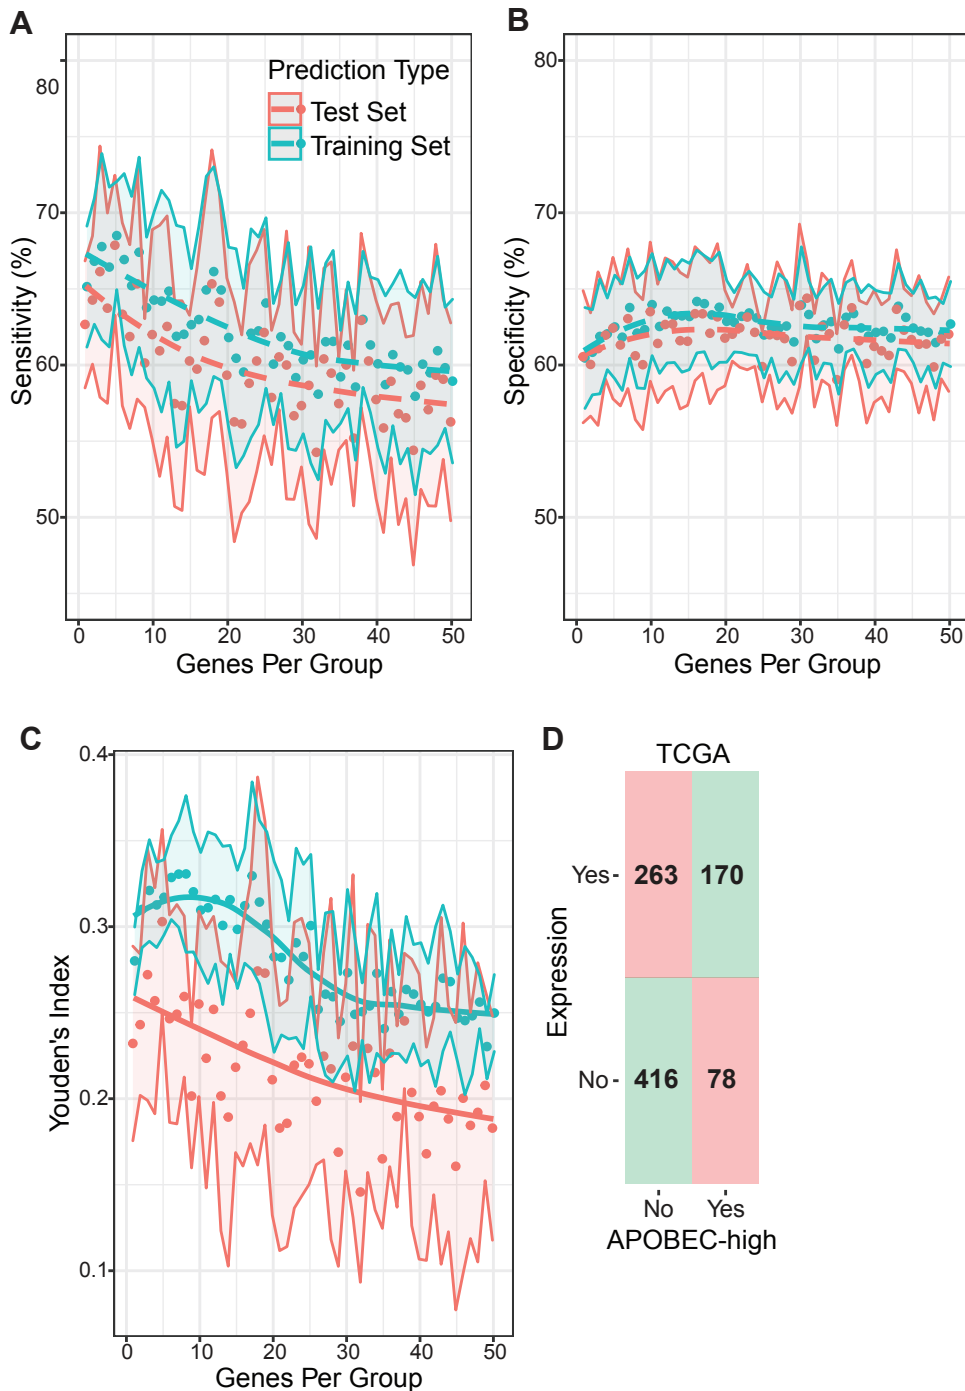

**Supplementary Figure S10: Methods for gene expressed-based classifier of APOBEC mutational signatures.**

**(A-B)** Ten-fold cross validated sensitivity (A) and specificity (B) of TCGA classification to nearest centroids (C1aNC) predictor using 1 to 50 of the top 5% most variably expressed genes to predict high versus low APOBEC enrichment by WES. In each run of the cross validation, 90% of all tumors were randomly selected to serve as the training set and the remaining 10% served as the test set. Points represent the mean sensitivity and specificity across the 10 folds, and confidence bands show standard deviation. **(C)** Ten-fold cross validated Youden's index (sensitivity + specificity - 1) for test and training sets. The maximum Youden's index in the test set was reached using 5 genes per group (10 total) and was therefore selected for the final model. Points represent mean Youden's index, and confidence bands show standard deviation. **(D)** Confusion matrix of predicted (gene expression classifier) versus true (APOBEC enrichment score > 2 by WES) classifications in the full TCGA dataset using the 10 gene predictor. Squares in red (upper left and bottom right) denote incorrect classifications and squares in green (upper right and bottom left) represent correct classifications.
